# Supplementary material for: RNA-seq analysis of small RNPs in Trypanosoma brucei reveals a rich repertoire of non-coding RNAs
Source: PubMed Central journal article supplement — Nucleic Acids Res. 2011 Oct 5;40(3):1282–98. doi: 10.1093/nar/gkr786 (PMC3273796; doi:10.1093/nar/gkr786), 2011-10-05
Supplement: supp_gkr786_nar-01585-h-2011-File012.pdf [file supp_gkr786_nar-01585-h-2011-File012.pdf]

## **S-1. List of oligonucleotides**

### **Oligonucleotides for RT-PCR**

**ETS sense (846-865)**, 5'- CATATATGCGCGTCCCCTG -3', sense, complementary to *T. brucei* 5'-ETS pre-rRNA from position 846-865, used for RT PCR of ETS pre-rRNA.

**SSU107**, 5'- GAGCCATGCGCAGATTCC-3', antisense, complementary to *T. brucei* SSU rRNA from position 79 -96, used to for RT-PCR of 5` ETS.

**ITS1-plasmid-sense**, 5'- CGAAAGTTCACCGATATTGC -3', sense, complementary to *T. brucei* SSU rRNA from position 2197-2216, used for RT-PCR of ITS1.

**ITS1 As 279-299**, 5'- GCGAGGTTTATATACACATAG-3', antisense, complementary to *T. brucei* ITS pre- rRNA from position 279-299, used for RT-PCR of ITS1.

**5.8S rRNA sense 23-40**, 5'- GGCTTCCTATTTTCGTTGA -3', sense, complementary to *T. brucei* 5.8S rRNA from position 23-40, used for RT-PCR of ITS2.

**ITS-2 AS**, 5'- CGTACACGAAAGAAGCAC-3', antisense, complementary to *T. brucei* ITS2 rRNA from position 361-378, used for RT-PCR of ITS2.

**LSU 5` sense (3` end)**, 5'- ACCGGCTTATCTGAAAAG -3', sense, complementary to *T. brucei* LSU-5' rRNA from position 1794-1811, used for RT-PCR of ITS3.

**srRNA1**, 5'- TAATGCGCCGAACTCACAAC -3', antisense, complementary to *T. brucei* srRNA1 rRNA from position 177 to 196, used for RT-PCR of ITS3.

**sr1 sense (165)**, 5'- AAAATGCAGCTCACCTACG -3', sense, complementary to *T. brucei* srRNA1 position 146 to 165, used for RT-PCR of ITS4.

**LSUB As 1-20**, 5'- GAGTACGGTCTGCAGTTGGG -3', antisense, complementary to *T. brucei* LSU 3' rRNA from position 1-20, used for RT-PCR of ITS4.

**LSUB 3'-80 sense**, 5'- GTTTAGACCGTCGTGAGACAG -3', sense, complementary to *T. brucei* LSU 3' rRNA from position 1406-1426, used for RT-PCR of ITS5.

**srRNA2 for PE**, 5'-GCATGGGAGTTCCTCTCGTA-3', antisense, complementary to *T. brucei* srRNA2 from position 51-70, used for RT-PCR of ITS5.

**srRNA2 sense**, 5'-TTGTGAAGGGATCTCGCAGG-3', sense, complementary to position 7-26 of *T. brucei* srRNA2, used for RT-PCR of ITS6.

**srRNA6 for PE**, 5'-GAAAATGAAGGTACTGGGCG-3', antisense, complementary to *T. brucei* srRNA6 from position 51-70, used for RT-PCR of ITS6.

**sr6 rRNA sense**, 5'- TCTCGAATCGCCACTTCTCT -3', sense, complementary to *T. brucei* srRNA6 from position 1-20, used for RT-PCR of ITS7.

**As ITS7**, 5'- GTAATGAAATTCTTCCGTTG -3', antisense, complementary to *T. brucei* ITS7 pre-rRNA from position 38-57, used for RT-PCR of ITS7.

**Tubulin sense**, 5'- TGCGTGAGGCTATCTGCATC -3', sense, complementary to position 2- 21 of Tb927.1.2380 ( $\alpha$ Tubulin).

**Tubulin antisense**, 5'-CCCTGAAGACCAGTGCAGTTG -3', antisense, complementary to position 381-401 of Tb927.1.2380 ( $\alpha$ Tubulin).

### **Oligonucleotides for synthesis of T7 transcribed RNA probes**

**ETS A0-62 sense (+10)**, 5'- TACCGTACGGAAGTAGTGTGTTTTGTGTTA-3' sense, specific to *T. brucei* 5' ETS rRNA, from position 934-952; unpaired nucleotides are highlighted in gray, used for synthesis of ETS PCR product for Northern analysis.

**18S +60 T7 AS (+10)**, 5'-TTAATACGACTCACTATAGGGAGAACAAACA

GGCATGCATGGCTAAGTCC-3', antisense, specific to *T. brucei* SSU rRNA, from position 42-60, carrying T7 promoter sequence (underlined); unpaired nucleotides are highlighted in gray, used for synthesis of ETS PCR product for Northern analysis.

**ITS2 473 sense (+10)**, 5'-TACCGTACGGGTGTATCACAGGAAGCAACT-3' sense, specific to *T. brucei* ITS2 rRNA, from position 473-492; unpaired nucleotides are highlighted in gray, used for synthesis of ITS2 PCR product for Northern analysis and RNase protection.

**LSU 5' 88 T7 AS (+10)**, 5'-TTAATACGACTCACTATAGGGAGAACAAACAAA

TCCCTCTTCGCTCGCCGC-3' antisense, specific to *T. brucei* SSU rRNA, from position 88-107, carrying T7 promoter sequence (underlined); unpaired nucleotides are highlighted in gray, used for synthesis of ITS2 PCR product for Northern analysis and RNase protection.

**Sr1 sense (160) (+10)**, 5'-AGTTCTAACTAAAATGCAGCTCACCTACG-3', sense, specific to *T. brucei* srRNA1, from position 161-179; unpaired nucleotides are highlighted in gray, used for synthesis of ITS4 PCR product for Northern analysis and RNase protection.

**LSUB AS T7 1-20 (+5)**, 5'-TTAATACGACTCACTATAGGGAGAACTACAGTACGGTCTGCAGTTGGG-3', antisense, specific to *T. brucei* LSU 3' rRNA, from position 1-19, carrying T7 promoter sequence (underlined); unpaired nucleotides are highlighted in gray, used for synthesis of ITS4 PCR product for Northern analysis and RNase protection.

**LSUB 3'-80 sense (+10nt)**, 5'-TCATTAGACCGTTTAGACCGTCGTGAGACAG-3', sense, specific to *T. brucei* LSU 3' rRNA, from position 1406-1426; unpaired nucleotides are highlighted in gray, used for synthesis of ITS5 PCR product for Northern analysis and RNase protection.

**ITS5 120 AS T7(+9nt)**, 5'-TTAATACGACTCACTATAGGGAGAACCACCACC

ACGTGTGTATAACAGCATT -3', antisense, specific to *T. brucei* ITS5 rRNA, from position 102-120, carrying T7 promoter sequence (underlined); unpaired nucleotides are highlighted in gray, used for synthesis of ITS5 PCR product for RNase protection.

**Sr2 sense 3`-60 (+10nt)**, 5'- GGCTAGGTTTACGGTGGTTCTCGGCTGA -3', sense, specific to *T. brucei* srRNA2 from position 124-141, unpaired nucleotides are highlighted in gray, used for synthesis of ITS6 PCR product for RNase protection.

**ITS6 T7 AS 5`+ 140 (+6nt)**, 5'- TTAATACGACTCACTATAGGGAGAGAAATTCAACGTCAATGAGCCATAT -3', anti sense, specific to *T. brucei* ITS6 rRNA, from position 122-140, carrying T7 promoter sequence (underlined), unpaired nucleotides are highlighted in gray, used for synthesis of ITS6 PCR product for RNase protection.

**Sr6 sense 3`-49 (+10nt)**, 5'- TCTTTCAACAGGCTCTGCCCGCCCTTG-3', sense, specific to *T. brucei* srRNA6, from position 31-46, unpaired nucleotides are highlighted in gray, used for synthesis of ITS7 PCR product for RNase protection.

**ITS7 T7 AS 5`+ 189 (+6nt)**, 5'- TTAATACGACTCACTATAGGGAGATATCTGTAGTACCACACAGTGTGA-3', anti sense, specific to *T. brucei* ITS7 rRNA, from position 172-189, carrying T7 promoter sequence (underlined), unpaired nucleotides are highlighted in gray, used for synthesis of ITS7 PCR product for RNase protection.

**TBsRNA-3**, 5'-TGCCGAATGGCTGTGGG-3', sense, specific to sequence 14-30 and 5'-TTAATACGACTCACTATAGGGAGAATTACACACACTCGCTC-3', antisense, complementary to sequence 57-73 of TBsRNA-3, carrying T7 promoter sequence (underlined), used for synthesis of TBsRNA-3 PCR product for RNA probe.

**TBsRNA-4**, 5'-TGAAGACGGCGTTATTG-3', sense, specific to sequence 26-41 and 5'-TTAATACGACTCACTATAGGGAGATATCTTTTGGTGAGGCA-3', antisense, complementary to sequence 106-118 of TBsRNA-4, carrying T7 promoter sequence (underlined), used for synthesis of TBsRNA-4 PCR product for RNA probe.

**TBsRNA-10**, 5'-GCGGGCGCAAGGATTTTC-3', sense, specific to sequence 1-17 and 5'-TTAATACGACTCACTATAGGGAGAAAGGGCGATTGCGGCTT-3', antisense, complementary to sequence 136-153 of TBsRNA-10, carrying T7 promoter sequence (underlined), used for synthesis of TBsRNA-10 PCR product for RNA probe.

**TB10Cs3C1/H1**, 5'-TCGCGTGATGAGGTGCA-3', sense, specific to sequence 1-17 and 5'-TTAATACGACTCACTATAGGGAGACCTCTCGCACGTGCTTC-3', antisense, complementary to sequence 174-190 of TB10Cs3C1/H1, carrying T7 promoter sequence (underlined), used for synthesis of TB10Cs3C1/H1 PCR product for RNA probe.

**TB11Cs2H1 (SLA1)**, 5'-CATGACCATACCCCATATATAC-3', sense, specific to positions -30 to -19 relative to Tb11Cs2H1 (SLA1) and 5'-TTAATACGACTCACTATAGGGAGAGAGTCTCGCTCTCCAGTTTC-3', antisense, carrying T7 promoter sequence (underlined), complementary to position 52-71 of SLA1, used for synthesis of SLA1 PCR product for RNA probe.

**U3**, 5`AAG ACC GTA CTC TGA ACA GAA TCG-3', sense, specific to positions 1-24 of U3 and 5'-TTAATACGACTCACTATAGGGAGAATCCTTCTGGAACCGGCTC-3', antisense, carrying T7 promoter sequence (underlined), complementary to position 124-142 of U3, used for synthesis of U3 PCR product for RNA probe.

**SL RNA**: 5'-AACTAACGCTATTATTA-3', sense, complementary to positions 1–17 of SL RNA and 5'-TTAATACGACTCACTATAGGGAGAAAAAAATAAAAAAATA-3', antisense, complementary to positions 143–161 of SL RNA, used for PCR amplification of the 161-bp fragment for in situ hybridization.

**U2 snRNA**: 5'-ATATCTTCTCGGCTATTTAG-3', sense, complementary to positions 112–131 of U2 snRNA, and 5'-TTAATACGACTCACTATAGGGAGAACCGTCGCGCTCCGTCCGGA-3', antisense, complementary to positions 240–259 of U2 snRNA used for PCR amplification of the 148-bp fragment for in situ hybridization.

## **Oligonucleotides for primer extension and northern analysis**

**AS TB6Cs1C1**, 5'- CAGTAAATCCTTGTATGAAG-3', antisense, complementary to *T.brucei* TB6Cs1C1 snoRNA from position 71-90.

**AS TB6Cs1C3**, 5'- TCCCGTGCTTATGATAGGTA -3', antisense, complementary to *T.brucei* TB6Cs1C3 snoRNA from position 65-84.

**AS TB9Cs2C1**, 5'- GTTGTGCGGCGCCCCAGAAA -3', antisense, complementary to *T.brucei* TB9Cs2C1 snoRNA from position 77-96, used for primer extension and Northern analysis.

**AS TB9Cs3C3**, 5'- AGACATAGCGCCTCTGTGCA -3', antisense, complementary to *T.brucei* TB9Cs3C3 snoRNA from position 101-120.

**AS TB10Cs4C4**, 5'-AGTCAAATACAGCACTCTCG-3', antisense, complementary to *T.brucei* TB10Cs4C4 snoRNA from position 72-91.

**AS TB9Cs5C1**, 5'-TTAGTGAAGCGTGTGTAAGT-3', antisense, complementary to *T.brucei* TB9Cs5C1 from position 56-75.

**AS TB11Cs2C2**, 5'-CAGGGCATAAAATAGTAC-3', antisense, complementary to *T.brucei* TB11Cs2C2 from position 66-83.

**AS TBsRNA-4**, 5'-TATCTTTGGTGAGGCAG-3', antisense, complementary to *T.brucei* TB11sRNA-4 from position 105-121.

**tRNA control** : 5'-GCTCCCGCTAATTGAGTG-3'

**U2 AS** : 5'-GAACAGTTTAATAAC-3', antisense, complementary to positions 31–45 of U2 snRNA.

**AS TB5Cs1C1**, 5'-TGTTTTCAATCGCAGGGTCC-3', antisense, complementary to snoRNA TB5Cs1C1, from position 38 to 57.

**U3 AS**, 5'- TGCCGTTTCATCGAAC -3', antisense, complementary to *T.brucei* U3 snoRNA from position 107-121.

**TB10Cs3C1H1\_Probe 1**, 5'-CCTCTCGCACGTGCTTC-3', antisense, complementary to *T.brucei* TB10Cs3C1H1 from position 174-190.

**TB10Cs3C1H1\_probe 2**, 5'-CATCAGAGATTGTTTAC-3', antisense, complementary to *T.brucei* TB10Cs3C1H1 from position 96-112.

**TB9Cs2C1\_Probe1'**,5'- GGAATGTTGTGCGGCGC -3' antisense, complementary to *T.brucei* TB9Cs2C1 from position 85-101.

**TB9Cs2C1\_Probe2'**, 5'-GCCTCGGACGCAGGACG-3', antisense, complementary to *T.brucei* TB9Cs2C1 from position 111-127.

**TB6Cs1C2\_Probe 1**, 5'-ACGTCGACGCGTACACC-3', antisense, complementary to *T.brucei* TB6Cs1C3 from position 77-93.

**TB6Cs1C2\_Probe 3**, 5'-TAACAACATCATTGGCG-3', antisense, complementary to *T.brucei* TB6Cs1C3 from position 17-33.

**TB6Cs1C3\_Probe 2**, 5'-CACCTCAGCGTTTCCTC-3', antisense, complementary to *T.brucei* TB6Cs1C3 from position 65-81.

**TB1Cs1H1**, 5'-CGCTCTCGGGTACCTTAA-3', antisense, complementary to *T.brucei* TB1Cs1H1 from position 51-68.

**TB1Cs2H1**, 5'-TGATCTCACTAGCTCATC-3', antisense, complementary to *T.brucei* TB1Cs2H1 from position 52-69.

**TB7Cs3H1**, 5'-CCTTCTCCGACGATTTA-3', antisense, complementary to *T.brucei* TB7Cs3H1 from position 57-73.

**TB11Cs6H1**, 5'-ATATCTCTCTCACATGA-3', antisense, complementary to *T.brucei* TB11Cs6H1 from position 50-66.

**TB11Cs1'H1**, 5'-GAATTCTCGTGGCCTTT-3', antisense, complementary to *T.brucei* TB11Cs1'H1 from position 56-72.

**TB3Cs3C1**, 5'-AATCAGAGTTGTGTTAA-3', antisense, complementary to *T.brucei* Tb3Cs3C1 from position 64-80.

**TB7Cs2C1**, 5'-TCAGAACACACGTATTG-3', antisense, complementary to *T.brucei* Tb7Cs2C1 from position 52-68.

**Tb11Cs4'C1**, 5'-AACGGTTATTCCATCAC-3', antisense, complementary to *T.brucei* Tb11Cs4'C1 from position 54-70.

### **Oligonucleotides for the silencing constructs:**

**T7 TB10Cs4C4 S XhoI**, 5'- CCGCTCGAGGGGCTGTGTATGAGGACAGAA -3', sense, complementary TB10Cs4C4 from position (-4) to (+16) relative to the +1 position of the gene, including the XhoI site (underlined), used for PCR amplification of the 150 bp fragment for cloning into the pZJM vector.

**T7 TB10Cs4C4 AS HindIII**, 5'- CCCAAGCTTAATAGAAGGTAACACTGAAG -3', antisense, complementary TB10Cs4C4 from position (+132) to (+151) relative to the +1 position of the gene, including the Hind III site (underlined), used for PCR amplification of the 150 bp fragment for cloning into the pZJM vector.

**T7 TB9Cs2C1 S XhoI**, 5'- CCGCTCGAGTTGTACTTTGCCCATGACGA -3', sense, complementary TB9Cs2C1 from position (-9) to (+11) relative to the +1 position of the gene,



including the XhoI site (underlined), used for PCR amplification of the 157 bp fragment for cloning into the pZJM vector.

**T7 TB9Cs2C1 AS HindIII**, 5`- CCCAAGCTTAAGGTGAGAAAGTTACCGTA -3, antisense, complementary TB9Cs2C1 from position (+118) to (+137) relative to the +1 position of the gene, including the Hind III site (underlined), used for PCR amplification of the 157 bp fragment for cloning into the pZJM vector.

**T7 TB6Cs1C3 S XhoI**, 5`- CCGCTCGAGTGGTTTGTGTGTGTGTGTAT -3`, sense, complementary TB6Cs1C3 from position (-42) to (-22) relative to the +1 position of the gene, including the XhoI site (underlined), used for PCR amplification of the 152 bp fragment for cloning into the pZJM vector.

**T7 TB6Cs1C3 AS HindIII**, 5`- CCCAAGCTTTGCAAAGAAAGGGGGAAGAT -3`, antisense, complementary TB6Cs1C3 from position (+90) to (+109) relative to the +1 position of the gene, including the Hind III site (underlined), used for PCR amplification of the 152 bp fragment for cloning into the pZJM vector.

### **Oligonucleotides for Northern Analysis:**

**7SL: Tb927.8.2861**

**7SL sense:** 5'- CCGCTCGAGAGCCGGAGCGCATTGCTCTG-3` from position 1-21.

**7SL antisense:** 5'- CCCAAGCTTCCGCCTCGCGACGACACTTG-3` from position 255-274.

### **Oligonucleotides for the “RNA walk”:**

**5681S:** 5`- ACTTGCAGACCGTACTCATCA-3`, sense, complementary to positions 5-25 of LSU $\beta$  rRNA.

**LCLSU $\beta$ 560AS:** 5`- CATGCGCGTCTCTAATTG-3`, antisense, complementary to positions 538-558 of LSU $\beta$  rRNA.

**6393S:** 5'- GTAGTATAGGTGGAAGCGC-3', sense, complementary to positions 699-717 of LSU $\beta$  rRNA

**LCLSU $\beta$ 1090AS:** 5'- CACTGAGCTCGCCTTAGG-3', antisense, complementary to positions 1079-1096 of LSU $\beta$  rRNA.

**LSU $\beta$ 1088S:** 5'- GCTCAGTGGGAACAGAAA-3', sense, complementary to positions 1089-1106 of LSU $\beta$  rRNA.

**LCLSU $\beta$ 1450AS:** 5'- CTTTGCACGGATAATCTT-3', antisense, complementary to positions 1447-1466 of LSU $\beta$  rRNA.

**3373S:** 5'- GAGTGTGGCAGGACCACCCG-3', sense, complementary to positions 9-28 of LSU $\alpha$  rRNA.

**LCLSU500AS:** 5'- GAAATGGAGGTACTTCC-3', antisense, complementary to positions 494-510 of LSU $\alpha$  rRNA.

**4353S:** 5'- GTAGCGATGCTGACGTGCAA-3', sense, complementary to positions 979-998 of LSU $\alpha$  rRNA.

**LCLSU1580AS:** 5'- GGGCCGGTGGATTCGGTT-3', antisense, complementary to positions 1417-1434 of LSU $\alpha$  rRNA.

**LCM21S:** 5'- GTGAGATTGTGAAGGGAT-3', sense, complementary to positions 1-18 of SR2 rRNA.

**LCM2-120SRLAS:** 5'- CGAGAACCACCGTGCGAT-3', complementary to positions 119-137 of SR2 rRNA.

**RR171:** 5'-GAGTGTGGCAGGACCACCCG-3',Sense, complementary to positions 1-21 of LSU5' rRNA.

**RR176:** 5'- TCCCTTGCGCGTCTGTTT-3',Antisense, complementary to positions 925-942 of LSU5' rRNA.

**RR291:** 5'- AATCTCCAGCCAAGTAGGGT -3',Antisense, complementary to positions 1375-1393 of LSU 3' rRNA.

**RR293:** 5`- GTAGTATAGGTGGAAGCGCA -3`, Sense, complementary to positions 718-737 of LSU 3` rRNA.

**RR364:** 5`-GGCTAGGTTTACGGTGGTTCTCGGCTGA-3`, Sense, complementary to positions 124-141 of srRNA2. Nucleotides highlighted in gray are unpaired nucleotide to make use of this oligo for RNase protection also.

**RR382:** 5`- CACAAGCCGTGCCACACACT -3`, Antisense, complementary to positions 90-111 of ITS6 rRNA.

**RR391:** 5`- TCTCGAATCGCCACTTCTCT -3`, Sense, complementary to positions 1-20 of srRNA6.

**RR392:** 5`- GAAAATGAAGGTACTGGGCG -3`, Antisense, complementary to positions 51-70 of srRNA6.

**RR292:** 5`- ACTGCAGACCGTACTCATCA -3`, Sense, complementary to positions 5-24 of LSU 3` rRNA.

**RR300:** 5`- GGCAGAAATCAGTTTGCG -3`, Antisense, complementary to positions 385-403 of LSU 3` rRNA.

**ITS4 Sense1-20:** 5`- TATGGAAAATGAAAACAAAA -3`, Sense, complementary to positions 1-20 of ITS4 rRNA.

**RR281:** 5`- TATAATATATGATTTTTGTTTTTC-3`, Antisense, complementary to positions 41-62 of ITS4 rRNA.

**ITS5 Sense1-20:** 5`- GGCAGTCCGTTTTTTTCTGG -3`, Sense, complementary to positions 1-20 of ITS5 rRNA.

**RR353:** 5`- TACACGTGTGTATAACAGC -3`, Antisense, complementary to positions 118-136 of ITS5 rRNA.

**ITS6 Sense1-20:** 5`-AAAAGCAAAAAGCAAAAAGA -3`, Sense, complementary to positions 1-20 of ITS6 rRNA.

**RR383:** 5`- TTAATACGACT CACTATAGGGAGAGAAATTCAACGTCAATGAGCCATAT -3`, Antisense, complementary to positions 122-140 of UTS6 rRNA. Underlined nucleotides are

T7 sequence and gray marked are extra nucleotides to use the same oligo for RNase protection also.

**ITS7 Sense1-20:** 5`- TGTTTTGAACGCGTTGAACA -3`, Sense, complementary to positions 1-20 of ITS7 rRNA.

**RR411:** 5`- GG TTCACAGAGTTGGTGGC -3`, Antisense, complementary to positions 294-314 of ITS7 rRNA.

**RR134:** 5`- GGCTTCCTATTTTCGTTGA-3`, Sense, complementary to positions 22-40 of 5.8S rRNA.

**RR133:** 5`- ATCGCACTTTGCTGCGTTCT -3`, Antisense, complementary to positions 41-60 of 5.8S rRNA.

**RR131:** 5`- ATTCGACACTGAGAAATGTGGC -3`, Antisense, complementary to positions 151-172 of 5.8S rRNA.

**RR172:** 5`- GTAGCGATGCTGACGTGCAA -3`, Sense, complementary to positions 978-997 of LSU5` rRNA.

**RR177:** 5`- GGCTTAAGCGTCATCCATTT -3`, Antisense, complementary to positions 1605-1624 of LSU5` rRNA.

**RR178:** 5`- ACCAGCTATCCTGAGGGAAA -3`, Antisense, complementary to positions 1238-1257 of LSU5` rRNA.

### **Biotinylated Oligonucleotides for the affinity:**

**Biotin Anti TBsRNA-4:** 5'-biotin/ CCGCCATCTGCTATCTAAGTGC -3', anti sense, complementary to TBsRNA-4 from position 48-67. Used for affinity purification of TBsRNA-4 cross-linked species. Unpaired nucleotides are highlighted in yellow.

**Biotin Anti TB9Cs2C1:** 5'-biotin/ CCCCATGTTTCGGGTGTGTGTCA -3', anti sense, complementary to TB9Cs2C1 from position 34-53. Used for affinity purification of TB9Cs2C1 cross-linked species. Unpaired nucleotides are highlighted in yellow.

**Biotin Anti TB6Cs1C3:** 5'-biotin/ CCCTTATGATAGGTAGCTTAGT -3', anti sense, complementary to TB6Cs1C3 from position 48-67. Used for affinity purification of TB6Cs1C3 cross-linked species. Unpaired nucleotides are highlighted in yellow.

**Biotin Anti TB10Cs4C4:** 5'-biotin/ CCTCAGTCAAGTACAGCACTCT -3', anti sense, complementary to TB10Cs4C4 from position 74-93. Used for affinity purification of TB10Cs4C4 cross-linked species. Unpaired nucleotides are highlighted in yellow.

## S-2

|                      | Total number of known | Run 1                    |                  |                | Run 2                    |                  |                |
|----------------------|-----------------------|--------------------------|------------------|----------------|--------------------------|------------------|----------------|
|                      |                       | Found in deep sequencing | Percentage found | Number of loci | Found in deep sequencing | Percentage found | Number of loci |
| <b>C/D snoRNA</b>    | 69                    | 62                       | 90%              | 232            | 62                       | 90%              | 246            |
| <b>H/ACA snoRNA</b>  | 48                    | 42                       | 88%              | 148            | 42                       | 88%              | 147            |
| <b>tRNA</b>          | 66                    | 66                       | 100%             | 70             | 66                       | 100%             | 76             |
| <b>rRNA</b>          | 106                   | 106                      | 100%             | 132            | 106                      | 100%             | 171            |
| <b>siRNA</b>         | NWA                   | NWA                      | NWA              | 1217           | NWA                      | NWA              | 5794           |
| <b>abundant sRNA</b> | 10                    | 10                       | 100%             | 39             | 10                       | 100%             | 39             |

Abundant sRNA (UsnRNA, MRP, SLRNA, 7SL, snR30)

### **S-2. Summary of published RNAs identified in both runs.**

Comparison between the results obtained in the first and second run of the RNA seq, demonstrating the number of loci detected for each group of RNAs and the extent to which these cover the known groups of small RNAs.

### S-3

|                     | Length (nt) | Number of repeats | Number of reads Run-1 | Number of reads Run-2 |
|---------------------|-------------|-------------------|-----------------------|-----------------------|
| <b>MRP</b>          | 533         | 2                 | 950                   | 7659                  |
| <b>snR30</b>        | 169/270     | 2                 | 42843                 | 334518                |
| <b>U1</b>           | 84          | 1                 | 98734                 | 621994                |
| <b>U2</b>           | 373         | 1                 | 114079                | 459460                |
| <b>U3</b>           | 147         | 1                 | 41933                 | 343143                |
| <b>U4</b>           | 114         | 1                 | 65418                 | 259669                |
| <b>U5</b>           | 76          | 1                 | 1023                  | 2403                  |
| <b>U6</b>           | 99          | 1                 | 14507                 | 87467                 |
| <b>SLRNA</b>        | 128         | 28                | 6442                  | 42935                 |
| <b>SRP RNA, 7SL</b> | 261         | 1                 | 10435                 | 51861                 |

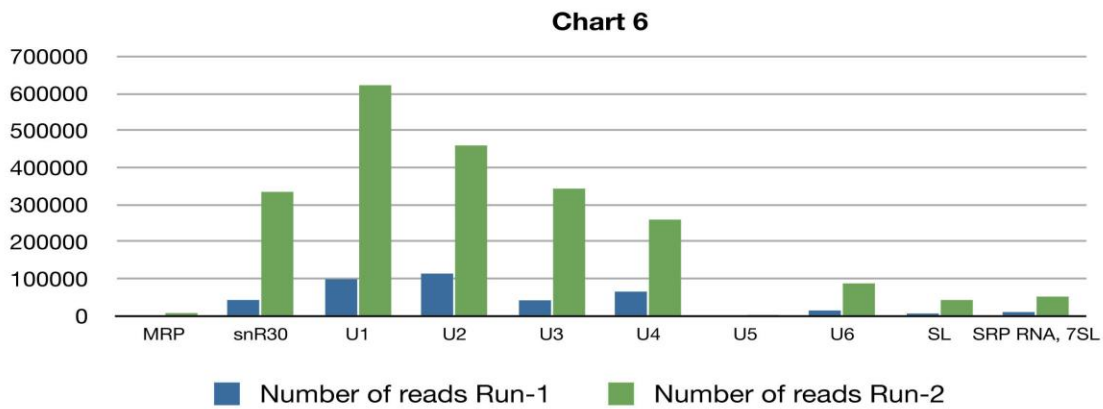

**S-3.Comparison of the number of reads in both runs of abundant sRNAs.** The number of reads obtained in each of the runs for the U snRNAs, 7SL (SRP) RNA and SL RNA is given.

### S-4: The sequence, and the number of reads of each snoRNA.

| Cluster | snoRNA    | Status              | length (bps) | # of genomic repeats | max num reads I | max num reads II | Sequence                                                                                                                                                                       |
|---------|-----------|---------------------|--------------|----------------------|-----------------|------------------|--------------------------------------------------------------------------------------------------------------------------------------------------------------------------------|
| TB1Cs   | TB1Cs1H1  | DS                  | 82           | 2                    | 507             | 2929             | GAAGGGCGCGTTGAGTGGGAAGCCATGCCGAATTT<br>AGTGCAGAGCCATCCTAATTAAGGTACCCGAGAGC<br>GCGGTGAGTTGTG                                                                                    |
|         | TB1Cs2H1  | DS                  | 64           | 4                    | 503             | 5933             | TTGGGGTCCCTGTCTGTCTTACGTGACTATGTAT<br>GAACCGTCACGTGTAAGATGAGCTAGTGA                                                                                                            |
| TB2Cs1  | TB2Cs1C1  | Doniger et al. 2010 | 200          | 1                    | 0               | 0                | TCTGCATTGGAACGTATGGCATCATGGCGGATTGG<br>GTGTATCGCGGTTATGTGGATTTGTGGTATGGCGT<br>GTAT                                                                                             |
| TB3Cs1  | TB3Cs1C-1 | Barth et al. 2008   | 84           | 3                    | 395             | 3448             | TGATGTGAATCTATCTGTGCAAATGACACCTCTAG<br>TCTGAAACACAACATGACGCGAGCACAAATACAAG<br>TTATCCCTGGCTGA<br>CTGATGACTATAACGTTTCACTCTTGTCTAGGAA<br>ATGTCTTGACGAAACTTATACTTCGTTTGATTCTG<br>A |
|         | TB3Cs1C1  | Liang et al. 2005   | 71           | 3                    | 97              | 668              | A                                                                                                                                                                              |
| TB3Cs2  | TB3Cs2C1  | Liang et al. 2005   | 119          | 2                    | 0               | 0                | GTGACGAATTTGAAGCCTCCGAGTCCGAAAGAAG<br>GATCCTGACACTGAGGATCAGAAAGATAACCGAGTC<br>GGAGCGGTCCCGCTCATCATCGAAGAAGCCTGAGG<br>A                                                         |
| TB3Cs2' | TB3Cs2'H1 | Myslyuk et al. 2008 | 150          | 1                    | 52              | 1066             | TAATGAGGGTCTAAGAGCTGGGGACCGAACCTTT<br>CCATGTTCTTCCAGTGTCAATGCCCTCAGAGA<br>GCAGCAGAGATGTTTGAGGGGCTTTGCTGCCACGA<br>AGTGTGGCCACAATAGCAAATACTGCGCCATAGGT<br>ACTCTGCAAGAAAT         |
|         | TB3Cs2'H2 | Myslyuk et al. 2008 | 85           | 1                    | 144             | 632              |                                                                                                                                                                                |



|                       |          |                   |     |   |      |                    |                                                                                                                                                                                                                                         |
|-----------------------|----------|-------------------|-----|---|------|--------------------|-----------------------------------------------------------------------------------------------------------------------------------------------------------------------------------------------------------------------------------------|
| T<br>B<br>3<br>C<br>s | TB3Cs3C1 | DS                | 80  | 1 | 112  | 2031               | TATGATGTCCAAATGCCAAATTTTACGCATCTATT<br>TTTCTGATGTGAAACGATGAATCAAAGCTTAACAC<br>AACTCTGATT                                                                                                                                                |
| T<br>B<br>5<br>C<br>s | TB5Cs1C1 | Liang et al. 2005 | 87  | 3 | 1908 | 9325               | GTGATGAATTTTAAAGCTTAGGACACCTTTGGACGC<br>AGGGACCCTGCGATTGAAAACAGTGAAAACCTTGATC<br>GATTCGTACACTGATTT                                                                                                                                      |
| T<br>B<br>5<br>C<br>s | TB5Cs2H1 | DS                | 105 | 1 | 165  | 1345               | AAGAGCTGCATTTTCGCCGAGAGTGAACAAAAAAAA<br>ACCAGTGTTTTCGCTCGTATAGAGCAGCTCCAGAT<br>TAAGTGAAGTGCGCGCCGTTATGGGTTTCATTTGGG                                                                                                                     |
| T<br>B<br>6<br>C<br>s | TB6Cs1C1 | Liang et al. 2005 | 93  | 5 | 6    | 1296<br>1101<br>58 | AGCATGATGATCATACTGCAATTCCTGTGGTATC<br>TGAAAAATGCAATGACAGAAGAAGCTGCGACGATGC<br>CTTCATACAAGGATTTACTGACT                                                                                                                                   |
|                       | TB6Cs1H1 | Liang et al. 2005 | 68  | 3 | 93   | 861                | GGCTAGCGAAAAACAGGGCGTTTTGCTTACGTCAA<br>TCACTGCGTCTGCACCTGTGCTACCCGAGAGTT<br>CGAGCCCCGTGGGTGAGGCGGCGGCTAACTCTT<br>TGGTGTGTGACGGCTCAATCGGACCCGCGAGAG<br>CT                                                                                |
|                       | TB6Cs1H2 | Liang et al. 2005 | 72  | 5 | 2033 | 9575               | CCAATGATGTTGTTATTTAATTATACACCTGATCA<br>TGTTGTTGATGAGAGGAAACGCTGAGGTTG<br>GTACCGCGGGTTGCACCGTTGCGGGACACGCTGAT<br>TGTCATGTGACGGACTTGCTGTGGAAGAGTG<br>ACACCTCATTATTAAGGTCCCTTGGCGACTGTAC<br>TTATCGATGCCGCTCCACAGGATACCCATTGAGGT<br>TAGATGC |
|                       | TB6Cs1C2 | Liang et al. 2005 | 64  | 5 | 317  | 2417               | GATGATGCTAACAATCGAGGCATTTGTATGATTTT<br>CAAATGAATTAGGCATCCGTGCACTAAGCTACCTA<br>TCATAAGCACGGGACTGAT                                                                                                                                       |
|                       | TB6Cs1H3 | Liang et al. 2005 | 68  | 6 | 336  | 1973               |                                                                                                                                                                                                                                         |
|                       | TB6Cs1H4 | Liang et al. 2005 | 77  | 6 | 223  | 2216<br>7514<br>1  |                                                                                                                                                                                                                                         |
|                       | TB6Cs1C3 | Liang et al. 2005 | 89  | 6 | 7837 | 1                  |                                                                                                                                                                                                                                         |
| T<br>B<br>6<br>C<br>s | TB6Cs2C1 | Liang et al. 2005 | 90  | 1 | 2    | 0                  | CGCTGATGAATTAATTTTTCTGAGTGTTTTCTTAG<br>AGTTCCGTAACGGGCATGATAAGCACACAAATTAT<br>GAACCCTTAACTCTGAGAG<br>GAAACACAGAAATCGTGATCCCTATTGATACACGT<br>TTTTTCAGCTGCGGATTATCAAAACTGTGTGAGATG<br>A                                                   |
|                       | TB6Cs2H1 | Liang et al. 2005 | 71  | 1 | 115  | 2223               | AATGTTGATGAGAGGAACTTGTAAGTTTGTATTCTT<br>TCCTGAGGTAGTGTGTATTACGAAAAATTAACCTTGT<br>GAGAAAGCATTCAAATGTTGTTTTGAAGG                                                                                                                          |
|                       | TB6Cs2C2 | Liang et al. 2005 | 99  | 1 | 0    | 0                  |                                                                                                                                                                                                                                         |

|                                 |           |                   |     |     |      |           |                                                                                                                                                                                    |
|---------------------------------|-----------|-------------------|-----|-----|------|-----------|------------------------------------------------------------------------------------------------------------------------------------------------------------------------------------|
| T<br>B<br>7<br>C<br>s<br>1      | TB7Cs1C1  | Barth et al. 2008 | 87  | 1   | 0    | 0         | TACGGTGATGAAAATACATGTATATGCTAACTTTT<br>CTGTACTCCATGGAGTGAGCATGAAGTGAATTATC<br>CGCAGAGAAGTCTGAAA                                                                                    |
| T<br>B<br>7<br>C<br>s<br>1<br>p | TB7Cs1'H1 | DS                | 75  | 1   | 26   | 293       | TCACGAATGGGTAGTCAGCTGCAGTCCGGCTTCAC<br>AAGTCATAGGCCACCGTGGCGTTACCCCATTCGAA<br>GAGCC                                                                                                |
| T<br>B<br>7<br>C<br>s<br>2      | TB7Cs2C1  | DS                | 68  | 1   | 130  | 1096      | AACATACTTTTTTCCTAACAAAACGCCTGAATGTG<br>TTGAATGATGCACAACCAATACGTGTGTTCTGA                                                                                                           |
| T<br>B<br>7<br>C<br>s<br>3      | TB7Cs3H1  | DS                | 74  | 2   | 58   | 470       | AACGACGAAGCTTACCGCGTGGGGTTCATTAAACT<br>AGTGAACAGCGCACGTAGAATAAAATCGTCGGAGAA<br>GGG                                                                                                 |
| T<br>B<br>8<br>C<br>s<br>1      | TB8Cs1C1  | Liang et al. 2005 | 83  | 6   | 4902 | 2610<br>0 | GTGTGTGATGTATATACGACTATGAACAACCTCGTC<br>AGAGTGCTATCTTTGATGATCACATACATTTTGCT<br>TCCTCACTGACAA                                                                                       |
|                                 | TB8Cs1C2  | Liang et al. 2005 | 74  | 5.5 | 468  | 3604      | CACGGTGATGTTCAATACAATAACTGATGTAATGA<br>GACCTAGTGGAATACTGCGGACACTTCTTGTTCTG<br>AGCG                                                                                                 |
|                                 | TB8Cs1C3  | Liang et al. 2005 | 118 | 5   | 2622 | 1933<br>1 | ACACATGATGAGCAGCAAAGAAAGGGAATCTCTTG<br>TCGAGCTCAGGGAATGAATCCCAGTGGCGGTGACA<br>TGACAACTTTGATATTACTATAATCCATTCTATT<br>CTGTTACTGATGC                                                  |
|                                 | TB8Cs1C4  | Liang et al. 2005 | 78  | 6   | 2419 | 2415<br>6 | TCCCTTGATGATTGTGGCAACTCTCCACGGAACTT<br>ATCTGACAAAATTTGCCTACGAACCTATTACCAAG<br>GCTGAGGT                                                                                             |
| T<br>B<br>8<br>C<br>s<br>2      | TB8Cs2C0  | Liang et al. 2005 | 96  | 1   | 235  | 1160      | GCGCGTGATGAATAAATAACAAACGACCAATAATCG<br>GAAGCGTCAGTAACACCTCACGCATGACGCCACTT<br>TGAATGCAATACTAATTATCTGACTC                                                                          |
|                                 | TB8Cs2H1  | Liang et al. 2005 | 67  | 5   | 145  | 280       | ACACCTCCGCTTCGCTCGTGGCATTCTTCCAGTGA<br>GCGCACTTACGATGGATGGTGGAGGAAGAATA<br>TACCTCGATGATGTGTATGAGAACAAGCATATGTC<br>CGAGCTGACCACAATTGTGGCACAATGAGAGCATT<br>ACTCGAGTCCTTGAAAAGCTGAGTG |
|                                 | TB8Cs2C1  | Liang et al. 2005 | 94  | 3   | 776  | 5838      | GCAAAGCAAATAAACAGCGGGGGAAACCTCGTCTC<br>AAAATGTGATTTTGCCTGAACGAGCGTTTTCAAGC<br>GTCATCCACTGACTC                                                                                      |
|                                 | TB8Cs2C2  | DS                | 85  | 3   | 722  | 5533      |                                                                                                                                                                                    |

|                       |          |                   |                        |    |     |      |                                                                                                            |                                                                                                                                                            |
|-----------------------|----------|-------------------|------------------------|----|-----|------|------------------------------------------------------------------------------------------------------------|------------------------------------------------------------------------------------------------------------------------------------------------------------|
| T<br>B<br>8<br>C<br>s | 3        | TB8Cs3C1          | Liang et al. 2005      | 83 | 3   | 27   | 729                                                                                                        | GCCAGTGATTATACGTAATGTCTTTGCTACAGGTG<br>ATTGTACGATATGACCATAACCGACTAAACCAACCG<br>AGATCAATGAGGC                                                               |
|                       |          | TB8Cs3C2          | Liang et al. 2005      | 87 | 3   | 478  | 3055                                                                                                       | CGGTGTGATTACAGACAGGATGTAAGTGAGTCAAT<br>GTCAATATCTCCGTATTACACCATGAGGACTATTG<br>TCCCCGTGTCTGACCG                                                             |
|                       |          | TB8Cs3C3          | Liang et al. 2005      | 81 | 3   | 463  | 2964                                                                                                       | ACACATGATGTCATTTCTGATTCTGCAATACTGAC<br>AATAACTTGAGCGAGACAAGACATATTTGACTACT<br>GGCAACTGAAAC                                                                 |
|                       |          | TB8Cs3H-1         | DS                     | 67 | 6   | 151  | 493                                                                                                        | CACGAGGCTCAAAAAGAACACACTGAGCGTGTACCA<br>ATGCCCAGTGAGTGGGACAGCCATCGAAGATAA<br>CAATGAGGTTTCAATGCGCCTGACGGTTTTTGTCC                                           |
|                       | TB8Cs3H1 | Liang et al. 2005 | 65                     | 5  | 561 | 5316 | GACGTGGTGTGGGAAACGCTCAAAGAAGT                                                                              |                                                                                                                                                            |
| T<br>B<br>8<br>C<br>s | 4        | TB8Cs4C1          | Myslyuk et al.<br>2008 | 90 | 1   | 13   | 0                                                                                                          | TGATGAGAGAAAAGAGGGAAGGGAATGACCATCGGA<br>TTAATGAAAACATTTTCATAGCACATGTGGAGCGGT<br>GTAAATCCTTCTGTTTCTGA                                                       |
|                       |          | TB8Cs4H1          | Myslyuk et al.<br>2008 | 70 | 1   | 0    | 0                                                                                                          | CATCTGTGGGCTCACCCGGGTGATTAATGCACTT<br>TAAAAGTGGGGAACGTGACACCCAAAGGGAGAAGG<br>AAACGAGGGACATCGTCGGGGGCTCTGATTCAACT                                           |
|                       |          | TB8Cs4H2          | Myslyuk et al.<br>2008 | 73 | 1   | 427  | 3158                                                                                                       | TCTGTGGGGCCAAACCGAAACAACACCTTCGAAGA<br>TAT                                                                                                                 |
|                       |          | TB8Cs5H1          | DS                     | 68 | 1   | 114  | 1090                                                                                                       | ATCCCAATGATTTGCCGCCATTGATCGACAGAAAT<br>GCTCAGCCAGGCGTACTCAGTTGGGGGAGATGT                                                                                   |
| T<br>B<br>8<br>C<br>s | 6        | TB8Cs6H1          | DS                     | 68 | 1   | 388  | 1330                                                                                                       | AATGACCGTTTCGTGCCTTCACTACCTCGATGTGC<br>AGTGGTAGATGGAAGTCAGATAGCGGCCAGAGA                                                                                   |
|                       | 1        | TB9Cs1H1          | Liang et al. 2005      | 68 | 2   | 220  | 1662                                                                                                       | ACAGCACAGAAAATGAAGCTAGTTATGGCGTACCG<br>CTGCTGCTCTAGTGCCGACACTGTGCGAGATGC<br>ACACGGGGCAATCCGAGGTCAGTGAGCTTCACTTC<br>GTGCCGATGATGCCTTCTGGTGGCTCCGGAGAAG<br>C |
|                       | TB9Cs1H2 | Liang et al. 2005 | 71                     | 2  | 88  | 0    | CTTCGTGATGATCCCGGAACTGAGTGTACCTTTT<br>TTCAGCACTTTTCGTGCAATGGAATGTAATGGCACC<br>GTGCCCTCTTGTGGGTGTACTIONGATA |                                                                                                                                                            |
|                       | TB9Cs1C1 | Liang et al. 2005 | 98                     | 2  | 707 | 7322 | AGAACGCGCTATTAGCTCCCAACGGGTATGACTGC<br>TTCCACTTGGGTTTCTGAGGCGTGTGAGAGTG                                    |                                                                                                                                                            |
|                       | TB9Cs1H3 | Liang et al. 2005 | 67                     | 2  | 297 | 1304 |                                                                                                            |                                                                                                                                                            |

|                            |             |                     |     |   |           |           |                                                                                                                           |
|----------------------------|-------------|---------------------|-----|---|-----------|-----------|---------------------------------------------------------------------------------------------------------------------------|
| T<br>B<br>9<br>C<br>s<br>1 | ' TB9Cs1'H1 | Doniger et al. 2009 | 70  | 2 | 539       | 2770      | GCAGTACCGTGTTACCCTACCGACTACTTTGATAT<br>GTTGGATGATTTGGGTGTCAAAGGGCTGCAAGAT                                                 |
| T<br>B<br>9<br>C<br>s<br>1 | " TB9Cs1"H1 | DS                  | 80  | 1 | 99        | 981       | CCTTCCGCCTTTGTAGCCCACTGCTGTGCGAGTTG<br>TGCCGCACTTTTGGCCGGATACGGTGTGGCTCCG<br>GTGAGAAGACA                                  |
| T<br>B<br>9<br>C<br>s<br>2 | TB9Cs2C1    | Liang et al. 2005   | 107 | 6 | 2005<br>3 | 8367<br>5 | GCCCATGACGATAAAACCACTTACGACGGTCTTATG<br>ACACACACCCGAACATGGATTGAGCACGAGTGTTA<br>CGATAGTTTCTGGGGCGCCGCACAACATTCCCAGAG<br>GC |
|                            | TB9Cs2C2    | Liang et al. 2005   | 87  | 7 | 696       | 5143      | GTCAATGATGAGTCTGTCAAATCCGTGTTTTAGCT<br>GAATTTATTTGATGCTGACATCAGTTAATTTTGTG<br>TGTTTACTTCTGAGTA                            |
|                            | TB9Cs2C3    | Liang et al. 2005   | 97  | 7 | 1026<br>6 | 7219<br>7 | GTGGCCGATGATGGAACTAGTTGAGCGTCCAAAC<br>ATGTTCCGACGTCATATTCATGAGGGATCTATAACA<br>ACACAAATCACCTTTCGGGTCTGATGG                 |
|                            | TB9Cs2C4    | Liang et al. 2005   | 76  | 7 | 780       | 5822      | GGGTGACGATGTACAATATGTTCAAATTGCACCGA<br>GAACCTGTGAGGACACCATAACACAGACCTGCACT<br>GAACCT                                      |
|                            | TB9Cs2C5    | Liang et al. 2005   | 96  | 7 | 9903      | 9614<br>1 | GCCACTGATGAAAGAGCTTCCGATACCGCGTAGGC<br>GGAACGGAAACACACTATGTCGATGCAACTGTGAA<br>CTCTATCTTTCGCTCCGAGCTGACGT                  |
|                            | TB9Cs2C6    | Liang et al. 2005   | 79  | 7 | 1113      | 9794      | GCGTGTGATGAATACCTAATAACAAATTAACAG<br>CAACATCTGAACAGAACCCGTGACGCTAATATTGT<br>TTCTGACGC                                     |
|                            | TB9Cs2H1    | Liang et al. 2005   | 75  | 8 | 136       | 1701      | AAGGCCACATTGGAGTTGTGTCTTGGGCTAACAT<br>TTCTGTGTCCTTGTTTGCACACTCACGTGGTCCGA<br>GAATT                                        |
|                            | TB9Cs2H2    | Liang et al. 2005   | 73  | 8 | 1164      | 7688      | AAAGGGGCTTTAGCCATGGAGCGGCCGTTTTGTGA<br>TTGCATGCCGTAGGCCATCTTGGTGCCTCCGAGA<br>GTT                                          |
|                            | TB9Cs2C7    | Liang et al. 2005   | 91  | 8 | 1876      | 1281<br>5 | CTACTTGATGACATCAATGGACTGGAGTCTCTGAG<br>TGTATTTGAATGACAATAACCCATTTAAAGAATAT<br>TCTTCTTTCCCCGGCTGATGG                       |
| T<br>B<br>9<br>C<br>s<br>3 | TB9Cs3C1    | Liang et al. 2005   | 87  | 4 | 45        | 481       | ATTACTTGATGTATAACACGATATTCAGGTAAAGA<br>TTATCAGGAGTAACTGACTGAGATAACATCATGCA<br>CCACTCTGACCA                                |
|                            | TB9Cs3C2    | Liang et al. 2005   | 125 | 3 | 1735      | 5540      | CTCCATGATGCCATGACAAGACTATAAGAGCACAG<br>TTTGAACCTGACTTCACAAGACGGACGAGAACGTCG<br>CTGCAATATTCTGATGA                          |
|                            | TB9Cs3H1    | Liang et al. 2005   | 67  | 3 | 916       | 3198      | GAAGCACAATTTACACGGATTACCCCTGACTTATA<br>TTTTAATGCCGGTGTATCCGCCAGTGTGTGCCA<br>GATAT                                         |

|                       |          |                     |     |   |      |      |   |      |                                                                                                                                                                                                  |
|-----------------------|----------|---------------------|-----|---|------|------|---|------|--------------------------------------------------------------------------------------------------------------------------------------------------------------------------------------------------|
| T<br>B<br>9<br>C<br>s | TB9Cs3C3 | Liang et al. 2005   | 81  | 3 | 4417 | 3544 | 5 | 4417 | CTCTATGATGTTAAAAGAAGTTTTGTAGTAGGGTA<br>AAATCTGACATCCGACCATGAAGGTACGAATTTAA<br>TGTGCTTTCATGTGCTTCTGCTATTGTGGTTGCAC                                                                                |
|                       | TB9Cs3H2 | Liang et al. 2005   | 75  | 3 | 4663 | 4371 | 6 | 4663 | AGAGGCGCTATGTCTGAGAA<br>CGAGTGCCTCAGGTATTGTGGTGTGTTGTTGCTTA<br>TCGCCATCACAGGTTCAAGAGGCACAAGAAGT                                                                                                  |
| T<br>B<br>9<br>C<br>s | TB9Cs4H1 | Liang et al. 2005   | 66  | 5 | 312  | 2856 | 5 | 312  | TAAGGTTGCCTGTGTACCTCATGCGTCTCTTTGTG<br>GTGTTGTGGGGAATGAAGGCGACCGAGATAC<br>GATCGTGATGATATTAACCCTGCTCCGCTACTGAG                                                                                    |
|                       | TB9Cs4C1 | Liang et al. 2005   | 75  | 6 | 1421 | 1007 | 5 | 1421 | TGTTGAAGCATGAAACGATATCCTTCAGGGCTACT<br>GATGC<br>GTAGGCCCGCCAGCTACCACGTGGAGTGATACTC<br>TCTATCTCTACGACGGTTCGTTCTACCGGGCCAAGA<br>AAC                                                                |
| T<br>B<br>9<br>C<br>s | TB9Cs4H2 | Liang et al. 2005   | 73  | 6 | 1182 | 5741 | 6 | 1182 | CCACATGATGATCCATGTATTACCATATCGACAC<br>TGAGTCGAAACTCCCCGTGACGCACAAGTGATTG<br>TGCATGGAACCGCCGCACACGCTGTAGGGCACTG<br>ACTA                                                                           |
|                       | TB9Cs4C2 | Liang et al. 2005   | 109 | 6 | 1974 | 1340 | 2 | 1974 | TACTATGATTACATCCATAATGCGTCAGGACACAC<br>GAGTGTGTACGTGACTGTTGGATTCTAACGCGACG<br>CCGTAAGCAATATGATCA<br>TAAGTTTATTATTATCATTGTTTCAAGAAAAGACAA<br>AACTATCCGTAACGAGAAAA                                 |
| T<br>B<br>9<br>C<br>s | TB9Cs4C3 | Liang et al. 2005   | 88  | 6 | 396  | 3059 | 6 | 396  | TAAGTTTATTATTATCATTGTTTCAAGAAAAGACAA<br>AACTATCCGTAACGAGAAAA                                                                                                                                     |
|                       | TB9Cs4H3 | Liang et al. 2005   | 56  | 5 | 0    | 0    | 5 | 0    |                                                                                                                                                                                                  |
| T<br>B<br>9<br>C<br>s | TB9Cs5C1 | Liang et al. 2005   | 100 | 1 | 1896 | 1066 | 2 | 1896 | GCGAGTGATGAGAACATGGAAC TATTGCACGTTTA<br>TATGATAAGGCAACTTGATGACTTACACACGCTTC<br>ACTAAATATCGTACGAGCGATTACTGATCA<br>AGCCGGCGTAAGAGTCATTCCCCGTGGTCTTATCG<br>TGTACCAGGTAATGTAGTAAC TACGGCAAGATAT<br>A |
|                       | TB9Cs5H1 | DS                  | 70  | 1 | 310  | 1236 | 1 | 310  | GCATGATGACGAAAACAATTTTGCACGTCAGTTTGA<br>ATTAGCAAATGTGAAGATGAAATTGACACAGCTAT<br>TTTATGGGCTGTCTTGATCT                                                                                              |
| T<br>B<br>9<br>C<br>s | TB9Cs5C2 | Liang et al. 2005   | 90  | 1 | 147  | 897  | 1 | 147  | CCCTCCGTTGTTTGTGCTTTTTGATATACTTGCTA<br>ATGCTTTGAAGTGTGTGAGGGGAAGGGGAGGAGGG<br>AGAGAAAA<br>TGTTTCTTTTTATTATTATTATTGCTTACGTTCA<br>TAAAAAGTAGAGGAATGGAATGGAAAAGAGATGG                               |
|                       | TB9Cs6H1 | Myslyuk et al. 2008 | 150 | 1 | 0    | 0    | 1 | 0    |                                                                                                                                                                                                  |
| T<br>B<br>9<br>C<br>s | TB9Cs6H2 | Myslyuk et al. 2008 | 68  | 1 | 0    | 0    | 1 | 0    |                                                                                                                                                                                                  |
|                       | TB9Cs7H1 | Doniger et al. 2010 | 70  | 1 | 5    | 0    | 1 | 5    | CGTCTTGGCCACCAACTCATTAAGGAGCCATTGGG<br>TCATGAGCAAATACTTTTCGCCCGGCCAGCGTA<br>CGATGGCAAATACGCTTAAGGGCTTTTAC                                                                                        |

T  
B  
1  
0  
C  
s  
1  
T  
B  
1  
0  
C  
s  
1  
'  
T  
B  
1  
0  
C  
s  
2

|                 |                   |     |   |      |              |                                                                                                                                                                                                                                                                                                                                                                                                                                                                                                                                                                                                                                                                                                                                                                                                                                                                                                                                                                                                                                                                                                                                                                   |
|-----------------|-------------------|-----|---|------|--------------|-------------------------------------------------------------------------------------------------------------------------------------------------------------------------------------------------------------------------------------------------------------------------------------------------------------------------------------------------------------------------------------------------------------------------------------------------------------------------------------------------------------------------------------------------------------------------------------------------------------------------------------------------------------------------------------------------------------------------------------------------------------------------------------------------------------------------------------------------------------------------------------------------------------------------------------------------------------------------------------------------------------------------------------------------------------------------------------------------------------------------------------------------------------------|
| TB10Cs1C1       | Liang et al. 2005 | 96  | 3 | 2185 | 2220<br>5    | GTGTATGATGAGAAACCTATTTTTATGTAACCTCGG<br>GAGAACTGAGCATATTACCTGATGAGTAAACAATC<br>AATCGTTAGATAGTAGCACTGATGT<br>TCATCCCCCTTTAATAGCGAGTGGTCTTTGTGTGCA<br>TCTCCGCAAACCACTCGTCTACACCGGGGGAAAGA<br>TAA<br>TAGTGTGTGTGTCTGTGTCCGTCTACTAGTAAA<br>GGATGATGAGGATGCGGCCACCCACGCGACGTGA<br>TGCGGTGTGTGTGACTGCAGGCGTGTAGTTT<br>CCCCCTCCGCTGCCGTTGCAAAAAGCAAACCCATTTT<br>GGGCAACATACGCAGCCGCGCGCCACAAGACGCCCT<br>CCACCGCTCGACGGGGTGCCGCCATGACGCGGGTC<br>CCGAGCCAAAAGTCCCTCGCCGAATTTCCGAAGGC<br>AGTGAGTGCCCTCGCGTGGGGAGACCTGCGCGCAGT<br>AAAACCTCGTGCCGCTGGCGGTGCGGGGGCCACCG<br>GCTGTGGTGGTTGATCCCCCTCTGGTGGATCCCACA<br>GCAGCAACTACGCGGGCCGTAATTTCTGTCGGTGCG<br>AGACTCCCCACCCGGTGGTATGAATGGCGGGCACC<br>ACTGAGTACACGTATAGCCATGAGCGGCATGTGCA<br>GAAGAGGGCTTACAAAGGAGGCAGCGCGAGCGAGC<br>GAATGGGTAACACTGGCGCGCTGCAGAGAAA<br>TCACGTGATGAGCATTCAATTCACATCGCGACACA<br>CCGATGATTCGAATGAGTGAGCTTCGAATGGGATA<br>AATTTAATCGAGAAAAGAAGAGCTGAGAT<br>CGAGCACTCATTTCAGCTGCGCGAGCATAAGCGT<br>GTTGCTCCGTGGTCCGGTGACGTGCGAGACAC<br>GAGAATGATGAGATTGCCATCATACTATTGGAAGA<br>CGAGTCTGAACCCCTGATGCATTTTATCATGCGGCA<br>CTGACGA<br>GCAGGAACGTGGCAGGCTACCGAGGTACACTCGT<br>GCTTCGCGTGGTTCAACAACATGGTCCCAGATTG |
| TB10Cs1H1       | Liang et al. 2005 | 73  | 3 | 80   | 1137         |                                                                                                                                                                                                                                                                                                                                                                                                                                                                                                                                                                                                                                                                                                                                                                                                                                                                                                                                                                                                                                                                                                                                                                   |
| TB10Cs1C2 (MRP) | Liang et al. 2005 | 520 | 2 | 950  | 7659         |                                                                                                                                                                                                                                                                                                                                                                                                                                                                                                                                                                                                                                                                                                                                                                                                                                                                                                                                                                                                                                                                                                                                                                   |
| TB10Cs1C3       | Liang et al. 2005 | 98  | 2 | 1208 | 5853         |                                                                                                                                                                                                                                                                                                                                                                                                                                                                                                                                                                                                                                                                                                                                                                                                                                                                                                                                                                                                                                                                                                                                                                   |
| TB10Cs1H2       | Liang et al. 2005 | 67  | 2 | 414  | 1996         |                                                                                                                                                                                                                                                                                                                                                                                                                                                                                                                                                                                                                                                                                                                                                                                                                                                                                                                                                                                                                                                                                                                                                                   |
| TB10Cs1C4       | Liang et al. 2005 | 78  | 4 | 2524 | 2272<br>7    |                                                                                                                                                                                                                                                                                                                                                                                                                                                                                                                                                                                                                                                                                                                                                                                                                                                                                                                                                                                                                                                                                                                                                                   |
| TB10Cs1H3       | Liang et al. 2005 | 69  | 3 | 79   | 1173         |                                                                                                                                                                                                                                                                                                                                                                                                                                                                                                                                                                                                                                                                                                                                                                                                                                                                                                                                                                                                                                                                                                                                                                   |
| TB10Cs1'H1      | DS                | 68  | 1 | 55   | 458          | GAAATCTCGCAGTGTACTTTCGCTTAGGAGCTAC<br>AAATTAATGGAACGCCCATTTGTAAGACATCTAA<br>CGCCAGAAA                                                                                                                                                                                                                                                                                                                                                                                                                                                                                                                                                                                                                                                                                                                                                                                                                                                                                                                                                                                                                                                                             |
| TB10Cs2H1       | Liang et al. 2005 | 68  | 2 | 542  | 2356<br>1461 | TACGGCGTTGTCCGTTGGGCCAGTGGCAAATTTTA<br>TCCCTGCAGCCCTATCTCGCAACTCCTAGAACC<br>TAACATGACGAGTGAGGAGCGCTATATCTTCTTCA<br>CCAAGTGCAGAATTAACCGTCTGAGTACTTTATCA<br>CTTTGAAGTGAAGCGCAACCTGATTT<br>TCAGGGAGTTCTGTACGCCGCTGAGTGGTATTGCT<br>CGCTTAGTGAGCGATTTACTCCCCAGATTT                                                                                                                                                                                                                                                                                                                                                                                                                                                                                                                                                                                                                                                                                                                                                                                                                                                                                                     |
| TB10Cs2C1       | Liang et al. 2005 | 96  | 3 | 1572 | 2            |                                                                                                                                                                                                                                                                                                                                                                                                                                                                                                                                                                                                                                                                                                                                                                                                                                                                                                                                                                                                                                                                                                                                                                   |
| TB10Cs2H2       | Liang et al. 2005 | 66  | 3 | 215  | 2007         |                                                                                                                                                                                                                                                                                                                                                                                                                                                                                                                                                                                                                                                                                                                                                                                                                                                                                                                                                                                                                                                                                                                                                                   |

|                                 |                |                        |     |   |          |      |                                                                                                                                                                                                                                                                                                                                                                                                                                                                                                                                                                                                                                                                                                                                    |
|---------------------------------|----------------|------------------------|-----|---|----------|------|------------------------------------------------------------------------------------------------------------------------------------------------------------------------------------------------------------------------------------------------------------------------------------------------------------------------------------------------------------------------------------------------------------------------------------------------------------------------------------------------------------------------------------------------------------------------------------------------------------------------------------------------------------------------------------------------------------------------------------|
| T<br>B<br>1<br>0<br>C<br>s<br>2 | TB10Cs2C2      | Liang et al. 2005      | 70  | 3 | 1285     | 1167 | CGCTGATGAAGTTGATATGGTCCGTGTTTCAGATC<br>GCTGAATTGACGCACAATAGCATATCTTCTGAGTT                                                                                                                                                                                                                                                                                                                                                                                                                                                                                                                                                                                                                                                         |
|                                 |                |                        |     |   |          | 1    |                                                                                                                                                                                                                                                                                                                                                                                                                                                                                                                                                                                                                                                                                                                                    |
| T<br>B<br>1<br>0<br>C<br>s<br>2 | TB10Cs2'C1     | Barth et al. 2008      | 88  | 1 | 13       | 15   | GCACGTGATGAGAGTATGTTCTTTCTATATACTGA<br>TTTGTCCATTGAAGTACACAGATACATATTCATAG<br>ACTGTCGTTTCCCTGACC                                                                                                                                                                                                                                                                                                                                                                                                                                                                                                                                                                                                                                   |
|                                 |                |                        |     |   |          |      |                                                                                                                                                                                                                                                                                                                                                                                                                                                                                                                                                                                                                                                                                                                                    |
| T<br>B<br>1<br>0<br>C<br>s<br>2 | TB10Cs2"C<br>1 | Doniger et al.<br>2010 | 74  | 2 | 270<br>3 | 8084 | TGATGACATCACTAAGCGTTTCTGACGGAATTTCGT<br>ATGCTGAACACATAACAAACGCAAATCACTCCACA<br>CTGA<br>TGAGGCAAACGATGAAAAATAAATGGATCGCTGA<br>CTCTGAACACATTATCTGATTGACAGGACATTTCT<br>TTGACTATACCTCTGA<br>TGATTACAAAGCAATTTTATCCTCACCTGACGTG<br>AGTGGTTCTGTGACGAGAAACCGATTGACAATAAT<br>ACCAAGATCTGCTATGA                                                                                                                                                                                                                                                                                                                                                                                                                                             |
|                                 | TB10Cs2"C<br>2 | Doniger et al.<br>2010 | 77  | 2 | 454      | 2182 | AGACGCTGTATTAATCCCGCCCGTATGGCAAAC<br>CATGCCCGGGCGATTTCATGCACAGCGGAGATGC                                                                                                                                                                                                                                                                                                                                                                                                                                                                                                                                                                                                                                                            |
|                                 | TB10Cs2"C<br>3 | Doniger et al.<br>2010 | 95  | 2 | 809      | 6792 |                                                                                                                                                                                                                                                                                                                                                                                                                                                                                                                                                                                                                                                                                                                                    |
|                                 | TB10Cs2"C<br>4 | Doniger et al.<br>2010 | 63  | 2 | 125      | 594  |                                                                                                                                                                                                                                                                                                                                                                                                                                                                                                                                                                                                                                                                                                                                    |
| T<br>B<br>1<br>0<br>C<br>s<br>3 | TB10Cs3C1      | Liang et al. 2005      | 111 | 4 | 1416     | 9097 | CGCGTGATGAGGTGCAGAAGGCATGTCGCCGCTAC<br>GGCGGTGGCTCGCGTAGCCGTCTGGCTGTGCGCGT<br>ACTGTGAGCTACTGTACTCCATGGGTGAACAATCT<br>CTGATG<br>AGCAGTGTGCTATGCGTTCCCGTCAGTAATACGG<br>GCTAACGGTACGAAGCACGTGCGAGAGGT<br>GCCTGTGAACACAGCAGGTACACATGATGCACACA<br>ATTCAATACTCACTCTGAACATCACTTGTGAGGAG<br>GAATGTGATAACATGCACCACCAGCTGATCA<br>GCGCATGATGTGCTCAACTGGAATTACCATCTGAA<br>CGCGGGATAACCGCAAGTCGATGAATTAATGCTACG<br>TGCAATTACCTCCGCTGTTACTCGTATCACTGACAC<br>CGCGTGATGACATACAAAGTTGTTTGCACATTATC<br>CGACACACCGTGAGCGAGTTACAATATTACAAGAA<br>CACCATCTGAAT<br>CGGTGATTAGCAGTGCCTCTTCCACCTAACGACCC<br>TTGATGATTATGATACGATGCCCTGGTCAACAGAAC<br>TATACTACACCAAATTTAGTAAATGAGAC<br>GCAGCCGCCCGGGCAGGATGGCGCCCGTGTCCCTT<br>GGCGTGACGTCTAATCGGTGCGGCGAGATGT |
|                                 | TB10Cs3H1      | Liang et al. 2005      | 64  | 4 | 704      | 4818 |                                                                                                                                                                                                                                                                                                                                                                                                                                                                                                                                                                                                                                                                                                                                    |
|                                 | TB10Cs3C2      | Liang et al. 2005      | 101 | 4 | 525      | 4818 |                                                                                                                                                                                                                                                                                                                                                                                                                                                                                                                                                                                                                                                                                                                                    |
|                                 | TB10Cs3C3      | Liang et al. 2005      | 105 | 5 | 561      | 4821 |                                                                                                                                                                                                                                                                                                                                                                                                                                                                                                                                                                                                                                                                                                                                    |
|                                 | TB10Cs3C4      | Liang et al. 2005      | 82  | 4 | 902      | 5071 |                                                                                                                                                                                                                                                                                                                                                                                                                                                                                                                                                                                                                                                                                                                                    |
|                                 | TB10Cs3C5      | Liang et al. 2005      | 99  | 4 | 687      | 5984 |                                                                                                                                                                                                                                                                                                                                                                                                                                                                                                                                                                                                                                                                                                                                    |
|                                 | TB10Cs3H2      | Liang et al. 2005      | 66  | 4 | 567      | 1538 |                                                                                                                                                                                                                                                                                                                                                                                                                                                                                                                                                                                                                                                                                                                                    |
|                                 |                |                        |     |   |          |      |                                                                                                                                                                                                                                                                                                                                                                                                                                                                                                                                                                                                                                                                                                                                    |
| T<br>B<br>1<br>0<br>C<br>s<br>4 | TB10Cs4C1      | Liang et al. 2005      | 78  | 1 | 0        | 0    | GTACTTGAAGATGGGGATGATATGAATATGTTTCAT<br>ACGTAATGAGCGTTTTCTGCCTGCAATGAAGTAG<br>ACTGATGC                                                                                                                                                                                                                                                                                                                                                                                                                                                                                                                                                                                                                                             |
|                                 |                |                        |     |   |          |      |                                                                                                                                                                                                                                                                                                                                                                                                                                                                                                                                                                                                                                                                                                                                    |

|                                      |                   |                     |    |      |      |                                                                                                                                                                                                                                                                                                                                                                                                                                                                                                                                                                                                                                              |                                                                                                                                                                                                                                                                                                                                                                                                                                                                                                                                                                                                                                                                                                                                                                                                                                                                                                                                                                                                                                     |
|--------------------------------------|-------------------|---------------------|----|------|------|----------------------------------------------------------------------------------------------------------------------------------------------------------------------------------------------------------------------------------------------------------------------------------------------------------------------------------------------------------------------------------------------------------------------------------------------------------------------------------------------------------------------------------------------------------------------------------------------------------------------------------------------|-------------------------------------------------------------------------------------------------------------------------------------------------------------------------------------------------------------------------------------------------------------------------------------------------------------------------------------------------------------------------------------------------------------------------------------------------------------------------------------------------------------------------------------------------------------------------------------------------------------------------------------------------------------------------------------------------------------------------------------------------------------------------------------------------------------------------------------------------------------------------------------------------------------------------------------------------------------------------------------------------------------------------------------|
|                                      |                   |                     |    |      |      | TTATTTCTTTTCATATGTACAAACCTAAGGCAGTACC<br>C<br>C<br>A<br>A<br>A<br>A<br>T<br>A<br>C<br>G<br>C<br>T<br>T<br>A<br>T<br>C<br>A<br>C<br>T<br>C<br>A<br>T<br>C<br>A<br>C<br>C<br>C<br>A<br>A<br>G<br>A<br>A<br>A<br>A<br>A                                                                                                                                                                                                                                                                                                                                                                                                                         |                                                                                                                                                                                                                                                                                                                                                                                                                                                                                                                                                                                                                                                                                                                                                                                                                                                                                                                                                                                                                                     |
| TB10Cs4H1                            | Liang et al. 2005 | 77                  | 1  | 0    | 0    | TAGACAG                                                                                                                                                                                                                                                                                                                                                                                                                                                                                                                                                                                                                                      |                                                                                                                                                                                                                                                                                                                                                                                                                                                                                                                                                                                                                                                                                                                                                                                                                                                                                                                                                                                                                                     |
| TB10Cs4H2                            | Liang et al. 2005 | 68                  | 3  | 376  | 3209 | TTACCGTCTCTGTCTAACGCCTCACATGTGCAGAA<br>A<br>T<br>C<br>G<br>T<br>T<br>G<br>T<br>G<br>G<br>G<br>G<br>C<br>G<br>A<br>T<br>T<br>C<br>A<br>G<br>G<br>A<br>G<br>G<br>C<br>G<br>G<br>A<br>G<br>A<br>T<br>A<br>T<br>C<br>T<br>G<br>C<br>G<br>T<br>G<br>A<br>T<br>G<br>T<br>G<br>A<br>C<br>T<br>G<br>C<br>G<br>C<br>A<br>C<br>T<br>G<br>A<br>C<br>G<br>A<br>C<br>C<br>C<br>A<br>T<br>C<br>A<br>T<br>G<br>A<br>G<br>C<br>G<br>A<br>G<br>A<br>A<br>A<br>C<br>C<br>A<br>A<br>C<br>T<br>T<br>T<br>G<br>C<br>G<br>T<br>T<br>T                                                                                                                              |                                                                                                                                                                                                                                                                                                                                                                                                                                                                                                                                                                                                                                                                                                                                                                                                                                                                                                                                                                                                                                     |
| TB10Cs4C2                            | Liang et al. 2005 | 87                  | 3  | 1941 | 680  | ACCAATCTATCTGATTC<br>T<br>G<br>C<br>G<br>A<br>C<br>G<br>A<br>T<br>G<br>A<br>G<br>A<br>A<br>A<br>C<br>T<br>G<br>T<br>C<br>T<br>A<br>A<br>C<br>G<br>A<br>C<br>A<br>G<br>G<br>C<br>G<br>G<br>A<br>C<br>G<br>A<br>C<br>A<br>T<br>C<br>C<br>A<br>A<br>T<br>G<br>A<br>G<br>G<br>A<br>C<br>T<br>C<br>T<br>T<br>G<br>A<br>A<br>T<br>G<br>T<br>G<br>T<br>A<br>C<br>A<br>A                                                                                                                                                                                                                                                                             |                                                                                                                                                                                                                                                                                                                                                                                                                                                                                                                                                                                                                                                                                                                                                                                                                                                                                                                                                                                                                                     |
| TB10Cs4C3                            | Liang et al. 2005 | 80                  | 4  | 1406 | 6658 | ATGTTGAGCA<br>C<br>G<br>A<br>C<br>G<br>C<br>C<br>C<br>A<br>T<br>A<br>C<br>A<br>A<br>C<br>C<br>G<br>C<br>C<br>C<br>C<br>A<br>C<br>A<br>C<br>C<br>G<br>T<br>G<br>C<br>T<br>T<br>T<br>G<br>C                                                                                                                                                                                                                                                                                                                                                                                                                                                    |                                                                                                                                                                                                                                                                                                                                                                                                                                                                                                                                                                                                                                                                                                                                                                                                                                                                                                                                                                                                                                     |
| TB10Cs4H3                            | Liang et al. 2005 | 69                  | 4  | 229  | 510  | ATGCATTGTGGGGTGATACATGTGGCGGAGATGT<br>G<br>T<br>G<br>T<br>A<br>T<br>G<br>A<br>G<br>G<br>A<br>C<br>A<br>G<br>A<br>A<br>G<br>T<br>T<br>G<br>T<br>A<br>G<br>T<br>G<br>C<br>G<br>C<br>G<br>A<br>C<br>T<br>G<br>A<br>G<br>T<br>G<br>A<br>C<br>A<br>A<br>C<br>T<br>T<br>A<br>G<br>T<br>G<br>C<br>T<br>G<br>A<br>T<br>T<br>G<br>A<br>T<br>A<br>C<br>C<br>A<br>A<br>C<br>G<br>C<br>T<br>T<br>T<br>T<br>C<br>A                                                                                                                                                                                                                                        |                                                                                                                                                                                                                                                                                                                                                                                                                                                                                                                                                                                                                                                                                                                                                                                                                                                                                                                                                                                                                                     |
| TB10Cs4C4                            | Liang et al. 2005 | 96                  | 4  | 6308 | 1    | GCGAGAGTGCTGTACTTGACTGACAC                                                                                                                                                                                                                                                                                                                                                                                                                                                                                                                                                                                                                   |                                                                                                                                                                                                                                                                                                                                                                                                                                                                                                                                                                                                                                                                                                                                                                                                                                                                                                                                                                                                                                     |
| TB10Cs4H4                            | Liang et al. 2005 | 67                  | 4  | 300  | 3264 | TGAGGAGGCCCGTAGCCACGGCATGCCTTTTTGGT<br>G<br>G<br>T<br>G<br>C<br>G<br>T<br>T<br>G<br>T<br>G<br>G<br>G<br>T<br>G<br>G<br>T<br>G<br>G<br>C<br>T<br>T<br>T<br>C<br>A<br>A<br>G<br>A<br>G<br>G<br>C<br>T<br>G<br>T<br>A<br>G<br>A<br>A<br>G<br>T<br>G<br>A<br>G<br>G<br>C<br>T<br>T<br>A<br>T<br>G<br>T<br>T<br>G<br>T<br>G<br>C<br>T<br>T<br>T<br>T<br>T<br>G<br>A<br>A<br>A<br>A<br>A<br>T<br>A<br>T<br>C<br>A<br>C<br>T<br>A<br>C<br>A<br>C<br>T<br>T<br>A<br>C<br>C<br>G<br>G<br>A<br>G<br>T<br>G<br>C<br>A<br>C<br>T<br>T<br>G<br>T<br>C<br>A<br>G<br>T<br>A<br>T<br>C<br>G<br>T<br>T<br>A<br>A<br>A<br>G<br>C<br>T<br>G<br>A<br>G<br>C<br>C |                                                                                                                                                                                                                                                                                                                                                                                                                                                                                                                                                                                                                                                                                                                                                                                                                                                                                                                                                                                                                                     |
| TB10Cs4C5                            | Liang et al. 2005 | 86                  | 2  | 0    | 0    | TCGTTAAAGCTGAGCC                                                                                                                                                                                                                                                                                                                                                                                                                                                                                                                                                                                                                             |                                                                                                                                                                                                                                                                                                                                                                                                                                                                                                                                                                                                                                                                                                                                                                                                                                                                                                                                                                                                                                     |
| T<br>B<br>1<br>0<br>C<br>s<br>4<br>' | TB10Cs4'H1        | Doniger et al. 2009 | 99 | 1    | 194  | 392                                                                                                                                                                                                                                                                                                                                                                                                                                                                                                                                                                                                                                          | ACCCAAACGTCTGCTACGCGGTGTGCTTCGTACGC<br>A<br>T<br>G<br>T<br>T<br>G<br>A<br>A<br>T<br>T<br>C<br>A<br>T<br>G<br>T<br>T<br>G<br>G<br>G<br>A<br>T<br>A<br>G<br>G<br>A<br>G<br>T<br>G<br>G<br>C<br>A<br>C<br>C<br>A<br>C<br>A<br>A<br>A<br>G<br>C<br>G<br>G<br>C<br>G<br>T<br>G<br>A<br>G<br>A<br>T<br>G<br>A<br>C<br>A<br>T                                                                                                                                                                                                                                                                                                                                                                                                                                                                                                                                                                                                                                                                                                              |
| T<br>B<br>1<br>0<br>C<br>s<br>5      | TB10Cs5H1         | Myslyuk et al. 2008 | 86 | 1    | 0    | 0                                                                                                                                                                                                                                                                                                                                                                                                                                                                                                                                                                                                                                            | CTTTTTCTTTTATCTCGTTTTTGTAGATCTCTACCA<br>C<br>A<br>T<br>G<br>T<br>G<br>C<br>G<br>T<br>A<br>T<br>G<br>C<br>C<br>A<br>A<br>A<br>G<br>G<br>T<br>G<br>T<br>A<br>A<br>T<br>T<br>A<br>A<br>A<br>G<br>C<br>A<br>G<br>G<br>T<br>A<br>G<br>G<br>A<br>G<br>A<br>A<br>C<br>G<br>A<br>G<br>G<br>A                                                                                                                                                                                                                                                                                                                                                                                                                                                                                                                                                                                                                                                                                                                                                |
|                                      | TB10Cs5H2         | Myslyuk et al. 2008 | 70 | 1    | 0    | 148                                                                                                                                                                                                                                                                                                                                                                                                                                                                                                                                                                                                                                          | GGAGCAGACTACGTCTGTAATATGCGGAACCAACC<br>T<br>T<br>C<br>T<br>C<br>T<br>G<br>C<br>A<br>C<br>T<br>T<br>T<br>A<br>C<br>T<br>G<br>T<br>A<br>A<br>A<br>T<br>G<br>T<br>C<br>T<br>G<br>C<br>G<br>A<br>G<br>A<br>T<br>C<br>A<br>A<br>C<br>T<br>T<br>A<br>T<br>G<br>A<br>T<br>G<br>A<br>C<br>A<br>A<br>T<br>A<br>T<br>T<br>A<br>T<br>T<br>T<br>C<br>T<br>T<br>A<br>C<br>T<br>T<br>T<br>C<br>T<br>G<br>A<br>T<br>C<br>C<br>G<br>T<br>G<br>A<br>T<br>T<br>T<br>G<br>A<br>T<br>T<br>G<br>A<br>C<br>A<br>A<br>G<br>C<br>A<br>C<br>T<br>G<br>T<br>C<br>T<br>G<br>T<br>G<br>C<br>G<br>A<br>A<br>C<br>G<br>T<br>A<br>T<br>C<br>G<br>A<br>A<br>A<br>C<br>C<br>T<br>G<br>A<br>T<br>T<br>G<br>A<br>A<br>C<br>G<br>G<br>T<br>A<br>A<br>C<br>T<br>C<br>T<br>C<br>T<br>G<br>G<br>A<br>A<br>A<br>C<br>T<br>C<br>A<br>T<br>C<br>C<br>C<br>C<br>T<br>C<br>T<br>T<br>T<br>T<br>C<br>T<br>G<br>T<br>A<br>G<br>A<br>T<br>G<br>T<br>G<br>T<br>T<br>C<br>C<br>T<br>C<br>A<br>T<br>C<br>G<br>G<br>T<br>T<br>C<br>C<br>C<br>G<br>G<br>A<br>G<br>A<br>A<br>A<br>A<br>C |
|                                      | TB10Cs5C1         | Myslyuk et al. 2008 | 89 | 1    | 1039 | 8655                                                                                                                                                                                                                                                                                                                                                                                                                                                                                                                                                                                                                                         | GAACGGTAACTCTCTGGAAACTCATCCCCTCTTTT<br>C<br>T<br>G<br>T<br>A<br>G<br>A<br>T<br>G<br>T<br>G<br>T<br>T<br>C<br>C<br>T<br>C<br>A<br>T<br>C<br>G<br>G<br>T<br>T<br>C<br>C<br>C<br>G<br>G<br>A<br>G<br>A<br>A<br>A<br>A<br>C                                                                                                                                                                                                                                                                                                                                                                                                                                                                                                                                                                                                                                                                                                                                                                                                             |
|                                      | TB10Cs5H3         | Myslyuk et al. 2008 | 71 | 1    | 157  | 1732                                                                                                                                                                                                                                                                                                                                                                                                                                                                                                                                                                                                                                         | C                                                                                                                                                                                                                                                                                                                                                                                                                                                                                                                                                                                                                                                                                                                                                                                                                                                                                                                                                                                                                                   |
| T<br>B<br>1<br>0<br>C<br>s<br>6      | TB10Cs6C1         | Doniger et al. 2010 | 70 | 1    | 0    | 0                                                                                                                                                                                                                                                                                                                                                                                                                                                                                                                                                                                                                                            | GCCTCATCCATTGTGCATAAACTCAGTTTGGAAAAAG<br>C<br>G<br>A<br>A<br>T<br>T<br>A<br>A<br>G<br>T<br>A<br>G<br>C<br>G<br>T<br>T<br>G<br>A<br>C<br>T<br>T<br>A<br>C<br>C<br>G<br>C<br>T<br>G<br>C<br>T<br>C<br>T<br>G<br>C<br>C<br>A<br>A<br>A<br>C<br>A<br>C<br>A<br>C<br>C<br>A<br>A<br>C<br>C<br>A<br>C<br>A<br>T<br>G<br>A<br>T<br>A<br>A                                                                                                                                                                                                                                                                                                                                                                                                                                                                                                                                                                                                                                                                                                  |



|                                      |                      |                   |             |   |           |                    |                                                                                                                                                                                                                                                                                                                                                                                                                                                                                                                                                                                              |
|--------------------------------------|----------------------|-------------------|-------------|---|-----------|--------------------|----------------------------------------------------------------------------------------------------------------------------------------------------------------------------------------------------------------------------------------------------------------------------------------------------------------------------------------------------------------------------------------------------------------------------------------------------------------------------------------------------------------------------------------------------------------------------------------------|
| T<br>B<br>1<br>0<br>C<br>s<br>7      | TB10Cs7C1            | DS                | 82          | 1 | 418       | 3642               | GCUAUGAUGCCCUGUCAAAUAAAUGCGUUCUGUUUG<br>AACUGACGUUUAAAGUAGGAUGUCACUGAGACACA<br>AGAAACUGA                                                                                                                                                                                                                                                                                                                                                                                                                                                                                                     |
| T<br>B<br>1<br>1<br>C<br>s<br>1      | TB11Cs1C1            | Liang et al. 2005 | 76          | 1 | 0         | 0                  | CCGATTAATAATGTATGTGACGCACGGTGTCTAAA<br>ATAGGGGTACCTGCGTGCTCTGCAGTTGGGTTC<br>TGAACA<br>CTTATGATGAGAAGACACGTTTACCTGACACCTCT<br>TCTGATTTAACATTGACGAGTAAAACTGCTAACA<br>GTTATCCCTGTCTGAC<br>GTGCGTGATGTTCAACAACCGCAATCACTCCCATA<br>CCTCTGATAGTATTGTTTGATTGACACCATTGCGT<br>ACTGATGC                                                                                                                                                                                                                                                                                                                |
|                                      | TB11Cs1C2            | Liang et al. 2005 | 86          | 2 | 98        | 732                |                                                                                                                                                                                                                                                                                                                                                                                                                                                                                                                                                                                              |
|                                      | TB11Cs1C3            | Liang et al. 2005 | 78          | 2 | 541       | 2315               |                                                                                                                                                                                                                                                                                                                                                                                                                                                                                                                                                                                              |
| T<br>B<br>1<br>1<br>C<br>s<br>1<br>' | TB11Cs1'H1           | DS                | 73          | 1 | 54        | 516                | TGAGTGGTTAAAAAAGGAACATGACTGGGGTTCT<br>GCTCTCTCCTTTCATGATGGAAAGGCCACGAGAAT<br>TC                                                                                                                                                                                                                                                                                                                                                                                                                                                                                                              |
| T<br>B<br>1<br>1<br>C<br>s<br>2      | TB11Cs2C1            | Liang et al. 2005 | 76          | 2 | 7934      | 5836<br>0          | TGAATGATGACTGACAAAAACATCACAGACTTTGAT<br>GACCCCATGAACAAGAAAAATTGTCGCCCCAGACT<br>GATT<br>GAAGTGATTGACACCTAGGCCGATGTAAAGCCGTC<br>GCAGATGGACGTCGATATCTTGTGAAAACAGTACT<br>ATTTTATGCCCTGACTGATC<br>AAAGCTCTTTTATGTAGTGTGCGTACCACGAAAGT<br>AGCAGGTACTIONGCACACGAAACTGGAGAGCGAGACT<br>C<br>CGCGACAAGGTCAGCCTGAGGGCACACCTTCAGTG<br>TGTGTACGGCCTCGGGAGGGCGTATATCCGCTCGA<br>GTTCGAGAGCGAGGGAAATGGTGGCGTGAAGCTCT<br>GCCACTGGTGCATCAGTAGCTCGGCATTACTGTGT<br>TCGATGCTCTGCGCTCAGTGGACATGATGCTCCGC<br>CGCCCATATATCCCCTTATGTATATCCTGTGTGCG<br>CTCTAGTTCCGTTGGGACCCTGAAGAGTAAGCACA<br>CTAAACCATGCATTATACATGACC |
|                                      | TB11Cs2C2            | Liang et al. 2005 | 92          | 2 | 2         | 3817<br>2442<br>71 |                                                                                                                                                                                                                                                                                                                                                                                                                                                                                                                                                                                              |
|                                      | TB11Cs2H1<br>(SLA1)  | Liang et al. 2005 | 75          | 2 | 8         | 2243<br>1288<br>51 |                                                                                                                                                                                                                                                                                                                                                                                                                                                                                                                                                                                              |
|                                      | TB11Cs2C3<br>(snR30) | Liang et al. 2005 | 179/2<br>70 | 2 | 4284<br>3 | 3345<br>18         |                                                                                                                                                                                                                                                                                                                                                                                                                                                                                                                                                                                              |
| T<br>B<br>1<br>1<br>C<br>s<br>3      | TB11Cs3H1            | Liang et al. 2005 | 75          | 1 | 46        | 595                | AAAGCCCTCATGAACAATCCCACCGGTGAGTGTAC<br>TCATTTAATCTCGTGCGTGGACCTAGGAGCGCCAA<br>GATTT                                                                                                                                                                                                                                                                                                                                                                                                                                                                                                          |

T  
B  
1  
1  
C  
s  
4  
'  
T  
B  
1  
1  
C  
s  
5

|            |                     |     |   |      |      |                                                                                                                                                                                                                                                                                                                                                                                                                                                                                                                                                                                            |
|------------|---------------------|-----|---|------|------|--------------------------------------------------------------------------------------------------------------------------------------------------------------------------------------------------------------------------------------------------------------------------------------------------------------------------------------------------------------------------------------------------------------------------------------------------------------------------------------------------------------------------------------------------------------------------------------------|
| TB11Cs3C1  | Liang et al. 2005   | 92  | 1 | 129  | 786  | GGACGTGATGAAGAAAAATTATTTACTTCTGTTTG<br>GAGAGGGTTCAGGAACACTCTCCATGACGTTACCA<br>TAATTAATCCATTCTCTGATCA<br>TTTTGATGAAAAACCTTTCATGCTGTGTGACGTAC<br>TCCCTTATGAGGGCAGGCACAAGCTGCTTGCGGCC<br>TAGTGTGTCATGCAATTGATTATAGACGGCATTCTGA                                                                                                                                                                                                                                                                                                                                                                |
| TB11Cs3C2  | Liang et al. 2005   | 106 | 1 | 3972 | 3194 | A<br>TCGTTGTACCGAATGTGGCGTGAGCGTTGTGCATA<br>CCGGCGTATTCGCAATGCCGCCCTAAACGTACAAA<br>GATTG                                                                                                                                                                                                                                                                                                                                                                                                                                                                                                   |
| TB11Cs3H2  | Liang et al. 2005   | 75  | 1 | 0    | 0    |                                                                                                                                                                                                                                                                                                                                                                                                                                                                                                                                                                                            |
| TB11Cs4C1  | Liang et al. 2005   | 90  | 5 | 306  | 3047 | TCTAATGATGACAGTCAATAGTTTCCTGTCAGCCT<br>GACGGCAGTAGAGCCATTTTGAAGACATAATTTTT<br>AACTCAGCTACACTGAATC<br>GCCACTGATGCTGTGATGCATAATTGTTGTTTCGAG<br>GTCCAAACAGTTTGAGCGATGCATTGATAACGGAA<br>CATCAAAAATCACCTTTCGGCTGAGCA<br>AAATCTTACCCTGTCTAGCTGCCTGTCAGTATACT<br>TTCGGTGACGGTATTGGCTCGAAAGTGAAGAGAG<br>ATCG<br>CAGTGTGATGGAAACAACGATTATGTGTACGTGAA<br>GGTCAATATGCCTTACTTTATGAGCGCGCTTATTG<br>AATACTAAAATCAAACCTCAACAGGTCTGACTG<br>AGAGGTATGCATTGAGACCCACTGCCTTCATATGT<br>AGGCGAGTGGGAGCATCAGCATCCCGAGATAA<br>ACAGCGCAGCATCCCTTGGGCCAGTGGCAACCATT<br>TAATGCCGTGGGGATGTGGCCCTGTCTGTTGCG<br>CGAGAGCC |
| TB11Cs4C2  | Liang et al. 2005   | 97  | 5 | 328  | 2164 |                                                                                                                                                                                                                                                                                                                                                                                                                                                                                                                                                                                            |
| TB11Cs4H1  | Liang et al. 2005   | 74  | 5 | 86   | 1844 |                                                                                                                                                                                                                                                                                                                                                                                                                                                                                                                                                                                            |
| TB11Cs4C3  | Liang et al. 2005   | 101 | 6 | 173  | 940  |                                                                                                                                                                                                                                                                                                                                                                                                                                                                                                                                                                                            |
| TB11Cs4H2  | Liang et al. 2005   | 69  | 6 | 1098 | 7053 |                                                                                                                                                                                                                                                                                                                                                                                                                                                                                                                                                                                            |
| TB11Cs4H3  | Liang et al. 2005   | 78  | 5 | 793  | 7442 |                                                                                                                                                                                                                                                                                                                                                                                                                                                                                                                                                                                            |
| TB11Cs4'H1 | DS                  | 60  | 1 | 443  | 2576 | TGTGTAAACAGGGTGTGCTTGCCGCGTAGCTGCAC<br>CGTGTGATAGAGGTAGCGGAGATGA<br>CGTGTGATGATATTAGTGATCTTTTGAAGTTAGCC<br>CTTCAATCCGAGAGTTTCGTGATGGAATAACCGTT                                                                                                                                                                                                                                                                                                                                                                                                                                             |
| TB11Cs4'C1 | DS                  | 70  | 1 | 123  | 1561 |                                                                                                                                                                                                                                                                                                                                                                                                                                                                                                                                                                                            |
| TB11Cs5C1  | Myslyuk et al. 2008 | 88  | 1 | 0    | 0    | TGTTGAGTGTGTGCGTGCGTGGGTGATGTCTTTTG<br>TGGAACCCAACCTGTACCTGCCGGGTGCGGGAAC<br>GAGATGCCCGGAGCTGA<br>CTCAACACCCACCAACCAGCCCCCTTCTGTGCGGT<br>AGCTTGCACAATGGTGGCCAAAGTGTGGTGTGAGA<br>TTT<br>CAAGCAGCATCAGTACAGCGGTGGTATCGCTAAGG<br>CACCATGATACTTCCGCTGGCGATGTGGCGAGAT<br>AC                                                                                                                                                                                                                                                                                                                     |
| TB11Cs5H1  | Myslyuk et al. 2008 | 73  | 2 | 237  | 1612 |                                                                                                                                                                                                                                                                                                                                                                                                                                                                                                                                                                                            |
| TB11Cs5H2  | Myslyuk et al. 2008 | 72  | 2 | 329  | 757  |                                                                                                                                                                                                                                                                                                                                                                                                                                                                                                                                                                                            |

|                                 |           |                        |    |   |      |      |                                                                                            |
|---------------------------------|-----------|------------------------|----|---|------|------|--------------------------------------------------------------------------------------------|
|                                 | TB11Cs5C2 | Myslyuk et al.<br>2008 | 80 | 1 | 0    | 0    | TGCTGTTTTTCGTCTTCCTTGCGTTTTTTCCCTCT<br>ATTTTCGTGTTCCCTTTCGCCTACAAAGTTCCCGGCG<br>GTGACCCTGA |
|                                 | TB11Cs5H3 | Myslyuk et al.<br>2008 | 71 | 1 | 44   | 186  | TAAGGTCAGTTCGAAGGCCAGTACTTGTACCATT<br>GTAAGTGCAATGTGGTTCAAAAAGCTGACCAAGATT<br>T            |
| T<br>B<br>1<br>1<br>C<br>S<br>6 | TB11Cs6H1 | DS                     | 65 | 1 | 1335 | 5266 | TTTGTCTACGTGTGACTTCACAGGCAGTTAGTTGC<br>CGCTGTGCCTGAGTCATGTGAGAGAGATAT                      |
| T<br>B<br>1<br>1<br>C<br>S<br>7 | TB11Cs7C1 | DS                     | 75 | 1 | 74   | 455  | ACCGGTGATGACTAAAGCGGGAATATTTTCGCATGT<br>GTGTACGAATACACATCGCCGCTGCACCTGAACAA<br>AAGAG       |

**S-4. Summary of *T. brucei* snoRNAs identified to date.** Each snoRNA is listed with its name, reference to the paper in which it was initially reported, genomic location (chromosome, start, end, and strand), the maximum number of reads to the gene, and its sequence. Novel snoRNAs, identified in this paper, are highlighted in yellow and designated DS.

## S-5

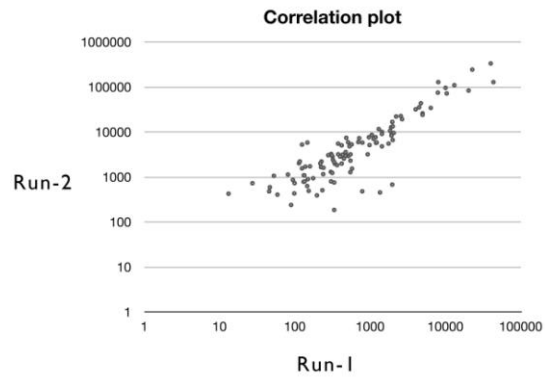

**S-5. Correlation plot between replicate experiments.** The correlation observed for the number of reads of snoRNAs in the two experiments.

S-6

A

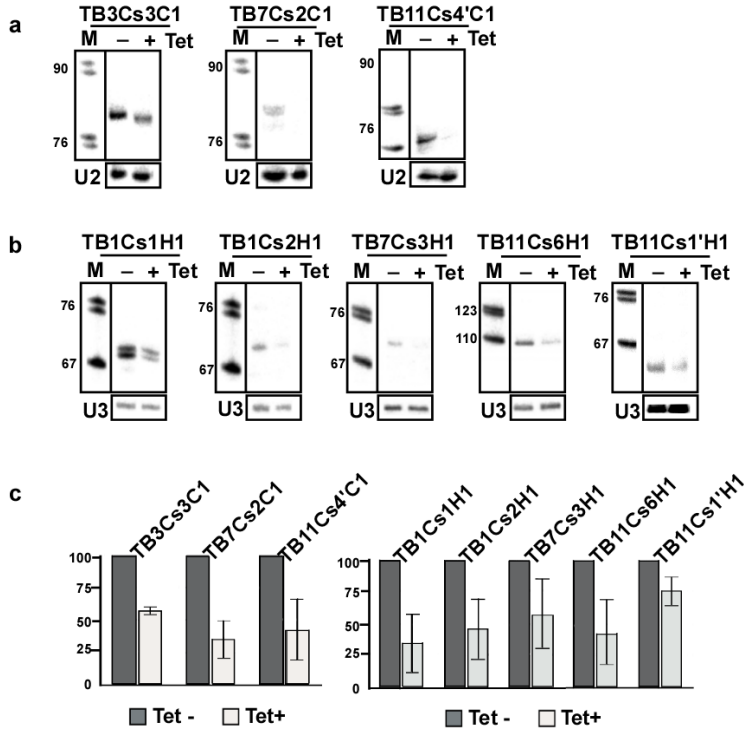

B

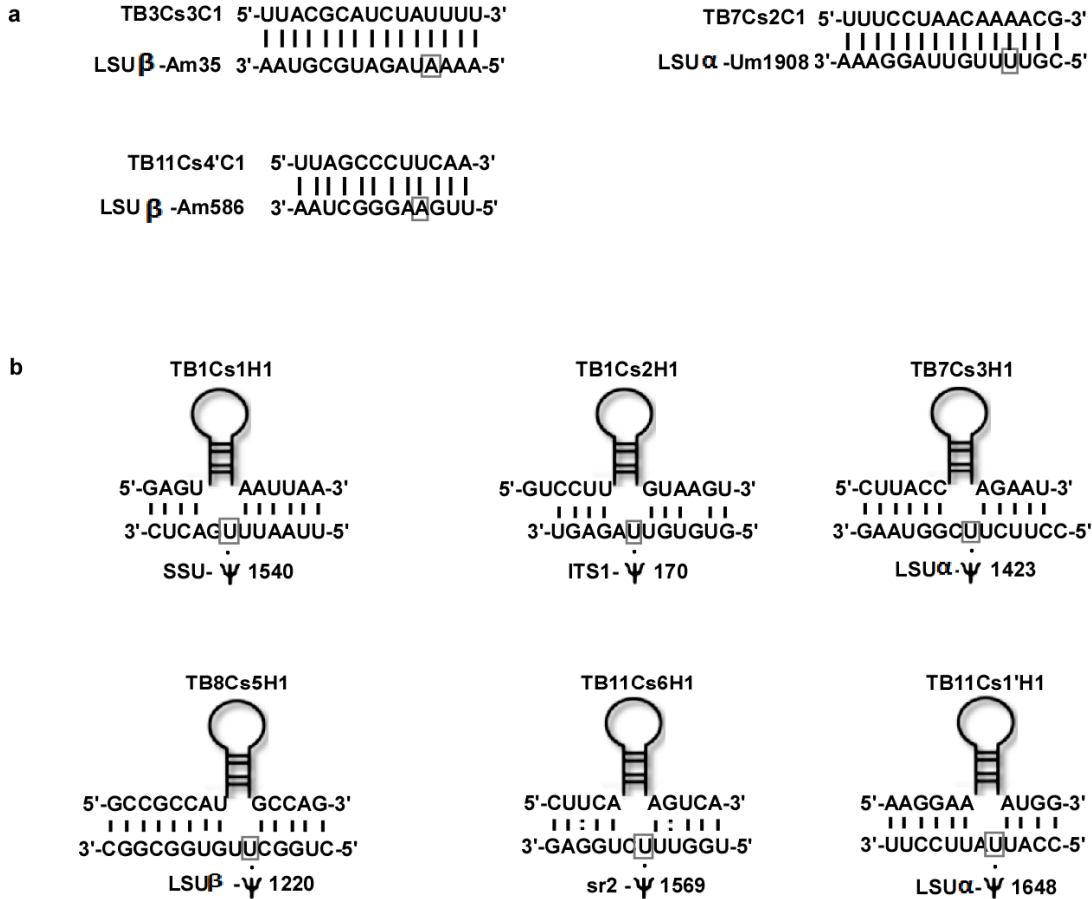

**S-6.A -The level of snoRNA in cells silenced for NOP58 or CBF5. A-a** - Level of C/D snoRNAs following NOP58 silencing. Total RNA (20 µg) was prepared from cells carrying the NOP58 silencing construct without induction (-Tet) or after 3 days of induction (+Tet). The level of the snoRNA was determined by primer extension. Primer extension with U2 snRNA was used to control for the amount of RNA in each sample. **b** - As in a, but analysis was performed on RNA isolated before and after 3 days of induction of CBF5 silenced cells. **c** - Quantitation of the data based on three independent silencing experiments. **B-a** - The potential base-pair interaction between rRNA and the C/D snoRNA. The position of the modified Nm is marked with a box. **b** - The potential for guiding pseudouridylation on rRNA is presented, and the pseudouridine position is indicated.

S-7

A

|            | Accuracy | Complete | Shorter       |               |      |       | Gap in the middle | Larger       |              |      |       | Total detected | Not detected by RNA-Seq | Total |
|------------|----------|----------|---------------|---------------|------|-------|-------------------|--------------|--------------|------|-------|----------------|-------------------------|-------|
|            |          |          | Shorter at 5' | Shorter at 3' | Both | Total |                   | Larger at 5' | Larger at 3' | both | Total |                |                         |       |
| C/D        | 54%      | 29       | 3             | 5             | 3    | 11    | 3                 | 3            | 7            | 1    | 11    | 54             | 10                      | 64    |
| H/ACA      | 74%      | 29       | 0             | 5             | 0    | 5     | 3                 | 2            | 0            | 0    | 2     | 39             | 7                       | 46    |
| Total      |          | 58       | 3             | 10            | 3    | 16    | 6                 | 5            | 7            | 1    | 13    | 93             | 19                      | 110   |
| Percentage |          | 62%      | 3%            | 11%           | 3%   | 17%   | 7%                | 5%           | 8%           | 1%   | 14%   | 100%           |                         |       |

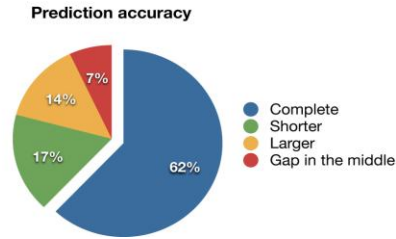

B

**TB6Cs1C2**

5' - **TGAAACTGAATTGCGGGCCCAATGATGTTGTTATTTAATTATACACCTGATCATGTTGTTGATGAG**  
**AGGAAACGCTGAGGTGTACGGCTCGACGT** - 3'

**TB8Cs1C4/TB8Cs1C1**

5' - **TCCCTTGATGATTGTGGCAACTCTCCACGGAACTTATCTGACAAAATTTGCCTACGAACCTATTA**  
**CCAAGGCTGAGGCTCTCTACAGTACCCTTGGCTTAAAGCTCTGTGTGTGATGATATACGACTATGAACAA**  
**CTCGTCAGAGTGCTATCTTTGATGATCACATACATTTTGCTTCTCCTACTGACAA****CATACCTGCATTTGC**  
**AATCACTCCTGTAA** - 3'

**TB8Cs2C0**

5' - **GCGCGTGATGAATAAATACAAACGACCAATAATCGGAAGCGTCAGTAACACCTCACGCATGACGC**  
**CACTTTGAATGCA****ATACTAATTATCTGACTC** - 3'

**TB8Cs2H1**

5' - **CACCTCCGCTTCGCTCGTGGCATTCTTCCA****GTGAGCGCACTTACGATGGATGGTGGAGGA**  
**AGA** - 3'

**TB8Cs2C1**

5' - **TACCTC****GATGATGTGATGAGAACAAGCATATGTCCGAGCTGACCACAATTGTGGCACAATGAGA**  
**GCATTACTCGAGTCCTTGAAAGCTGAGTG** - 3'

**TB8Cs3C2**

5' - **AGTGACGGTGTGATTACAGACAGGACGTAAGTGAAGTCAATGTCAATA****CTCCCGTATTACA** - 3'

**TB9Cs1H3**

5' - **TTAGTTCCCAACGGGCATGACTGCTTCCACTTGGGTTCTTGAGGCGGTGTGA****GAGTGT** - 3'

**TB9Cs1C1**

5' - **CTTCGTGATGATCCCGGAACTGAGTGTACCTTTTTTCAGCACTTTTCGTGCAATGGAATGTAATG**  
**GCACGGTGCCCTCTTGTGGGGTGTACTGATA****GAGATTAAACGGGAAACGTGCTGAT** - 3'

**TB9Cs2C7**

5' - **CTACTTGATGACATCAATGGACTGGAGTCTCTGAGTGTATTTGAATGACAATAACCCATTTAAAGA**  
**ATATTCTTCTTTCCCGGCTGATGG****TGTTTGGTTTCGTC** - 3'

- Larger in deep sequencing
- Shorter in deep sequencing

**TB9Cs2C1**

5' - GCCCATGACGATAAACCACTTACGACGGTCTTATGACACACACCCGAACATGGATTGAGCACGAGT  
 GTTACGATAGTTCTGGGGCGCCGCACAACATTCAGCCGCGTGCCTCGCTCCGAGGGCTAGC-3'

**TB9Cs2C5/TB9Cs2C6**

5' - GCCACTGATGAAAGAGCTTCCGATACCGCTAGGCGGAACGGAAACACACTATGTCGATGCAACTG  
 TGAACCTCTATCTTTCGCTCCGAGCTGACGTTGGGGTTAGCAGTTCGGCGAGTAGGTCCGTGTGATGAAT  
 ACCTAATATAACAAATTAACAGCAACATCTGAACAGAACCCGTGACGCTAATATTGTTCTGACGC-3'

**TB9Cs3H2**

5' -TCGAGTGCCTCAGGTATTGTGGTGTGTTGTTGCTTATCGCCATCACAGTTCAAGAGGCACAAGAA  
 GTGGATATCACT-3'

**TB9Cs4C1**

5' - GGATCGTGATGATATTAACCTGCTCCGCTACTGAGTGTGAAGCATGAAACGATATCCTTCAGGG  
 CTACTGATGCCTGCGTGGCAGTGTATGGGGTGT-3'

**TB10Cs1C4**

5' -AGAATGATGAGATTGCCATCATACTATTGGAAGACGAGTCTGAACCTGATGCATTTTATCATGCG  
 GCACTGACGATCTTACATTGGGGT-3'

**TB10Cs2C2**

5' -GATCGCTGATGAAGTTGATATGGTCCGTGTTTCAGATCGCTGAATTGACGCACAATAGCATATCTT  
 CTGAGTTCTGCACTGCCCCCTGACTATCGCTGTT-3'

**TB10Cs3C1/TB10Cs3H1**

5' -TCGCGTGATGAGGTGCAGAAGGCATGTCGCCGCTACGGCGGTGGCTCGCGTAGCCGCTGGCTGTG  
 CGCGTACTGTGAGCTACTGTACTCCATGGGTGAACAATCTCTGATGACGTGTACAGCGGGGAGCAGTGTG  
 GCTATGCGTTCCCGTCAGTAATACGGGCTAACGGTACGAAGCACGTGCGAGAGGT-3'

**TB11Cs2C2**

5' -CGTGAAGTGATTGACACCTAGGCCGATGTAAAGCCGTCGCAGATGGACGTCGATATCTTGTGAAAA  
 CAGTACTATTTTATGCCCTGACTGATGCCGTGGCCGC-3'

**TB11Cs3C2**

5' -TTTAACTGATGAAAACTTTTCATGCTGTGTGACGTAATCCCTTATGAGGGCAGGCACAAGCTGC  
 TTGCGGCCTAGTGTGTCATGAATTGATTATAGACGGCATTCTGAAA-3'

- Larger in deep sequencing
- Shorter in deep sequencing

**S-7. (A) Reads coverage of the snoRNAs versus the predicted consensus.** The pie chart illustrates the difference in coverage of the reads per snoRNA as compared to its consensus span. **(B) List of the sequences which differed from the consensus.** Each snoRNA is presented with its sequence illustrating the deviations from the consensus, areas where reads did not fully cover the snoRNA (orange) or where reads exceeded the boundaries of the predicted snoRNA sequence (green).



**A**

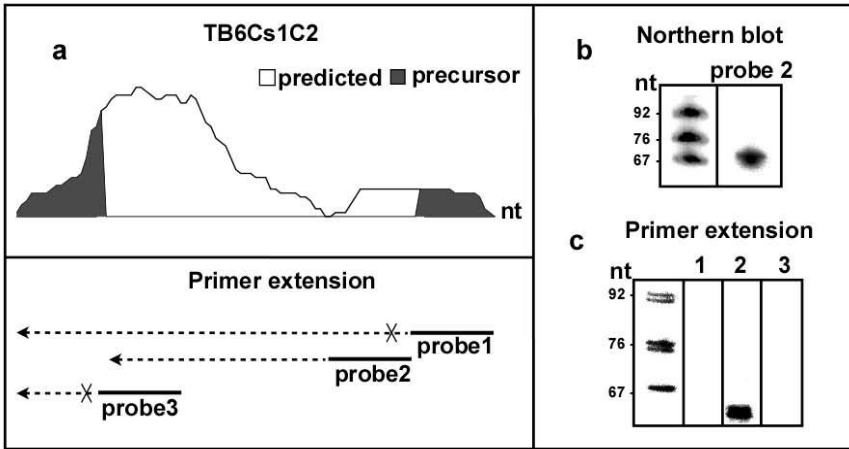

**B**

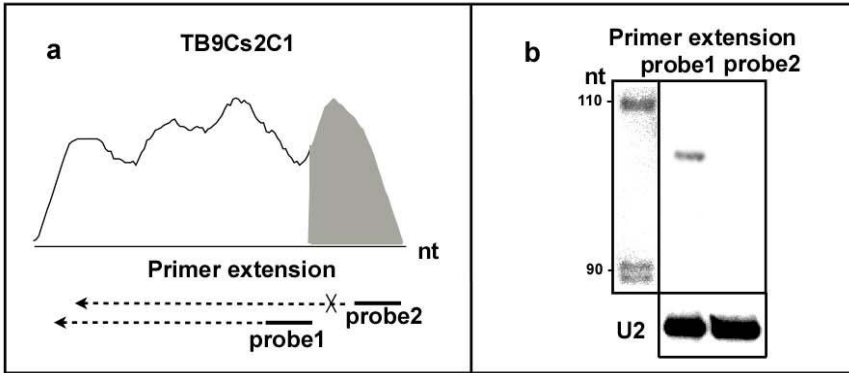

**C**

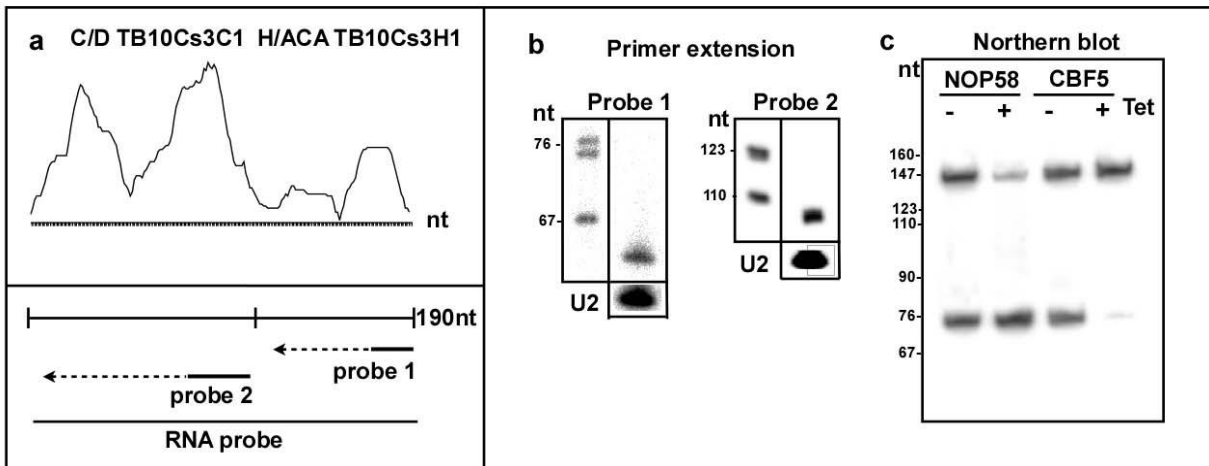

**S-8. Correlation between the RNA-seq reads and the transcripts in steady state.**

**A -a** - Schematic representation of the RNA-seq reads for TB6Cs1C2. The area representing the expected full length RNA is depicted in white and the area beyond the expected boundaries in gray (upper part). The position of the primer is indicated (lower part). **b** - RNA (20 $\mu$ g) was separated on a 10% denaturing gel and subjected to Northern analysis with probe 2. **c** - RNA (10 $\mu$ g) was subjected to primer extension with various probes, as indicated. pBR322 DNA-*Msp*I digest was used as a MW marker. **B-a** - Schematic representation of the RNA-seq reads for TB9Cs2C1. **b** - Primer extension with the two probes. Primer extension with U2 snRNA was used to control for the RNA level. **C-a** - Schematic representation of RNA-seq reads for TB10Cs3C1 and TB10Cs3H1. **b** - Primer extension with probe 1 and probe 2. **c** - Northern analysis to verify the identity of the RNAs. RNA was prepared from uninduced CBF5 or NOP58, and after 3 days of induction, the RNA was subjected to Northern analysis with a probe covering the two RNA molecules.

**S-9**

| Name      | Max # of reads | Chr     | Start   | End     | Strand | Sequence                                                                                                                                                             |
|-----------|----------------|---------|---------|---------|--------|----------------------------------------------------------------------------------------------------------------------------------------------------------------------|
| TBsRNA-1  | 183            | 1       | 82872   | 82920   | -1     | ATTTGGAAGAAGGCGTTGATTATTGCATGACCA<br>AAGGCTAAAAAGAGC                                                                                                                 |
|           |                | 11_02   | 270176  | 270224  | 1      |                                                                                                                                                                      |
|           |                | 4       | 31946   | 31994   | -1     |                                                                                                                                                                      |
|           |                | 5       | 33916   | 33964   | -1     |                                                                                                                                                                      |
|           |                | 9       | 2450733 | 2450781 | -1     |                                                                                                                                                                      |
| TBsRNA-2  | 361            | 1       | 593321  | 593430  | 1      | ATGATGCCTTGTGATTGTTTTGCCTTTTGCTAC<br>TATTCATCGGAGGCCGTGCGTGGCGTGCGCGGAT<br>TGTTGTGCAGGTGTACTGCCGGCGTGTCCCCGC<br>TGCGCGGT                                             |
|           |                |         | 594904  | 595013  | 1      |                                                                                                                                                                      |
|           |                |         | 598082  | 598191  | 1      |                                                                                                                                                                      |
|           |                |         | 599668  | 599777  | 1      |                                                                                                                                                                      |
|           |                | 601252  | 601361  | 1       |        |                                                                                                                                                                      |
| TBsRNA-3  | 1033           | 1       | 793143  | 793203  | 1      | TGCCGAATGGCTGTGGGTATGACACTTCCTCAGT<br>TAAGGGAAGGAGCGAGTGTGTGAATA                                                                                                     |
| TBsRNA-4  | 641            | 5       | 1271611 | 1271691 | -1     | ATAATGCACAAGACGTGTGTTCGTTGAGACGGCG<br>TTATTGCCGCTCCGCCTTAGATAGCAGATGGCC<br>AGGAGGTTGATACACCGTAATGGTAACATCCCTC<br>CTCTGCCTCACCAAAG                                    |
|           |                |         | 1273083 | 1273163 | -1     |                                                                                                                                                                      |
|           |                |         | 1273819 | 1273899 | -1     |                                                                                                                                                                      |
|           |                |         | 1275291 | 1275371 | -1     |                                                                                                                                                                      |
|           |                |         | 1276027 | 1276107 | -1     |                                                                                                                                                                      |
|           |                |         | 1276763 | 1276843 | -1     |                                                                                                                                                                      |
|           |                | 1277499 | 1277579 | -1      |        |                                                                                                                                                                      |
| TBsRNA-5  | 429            | 6       | 211576  | 211644  | 1      | CTTGAACCGTCGGCGGTAGCACGCAGCCCTGTA<br>GACTTCTGCGTGTGCCTGTCAATGTGTTCTCTGG<br>C                                                                                         |
|           |                |         | 218983  | 219051  | 1      |                                                                                                                                                                      |
|           |                |         | 227688  | 227756  | 1      |                                                                                                                                                                      |
| TBsRNA-6  | 249            | 5       | 1270801 | 1270831 | -1     | CTTCTGTGCCATACACTCCTCACTAGATCATCTG<br>GAGATGCGATTGCGGTGCCATTTTC                                                                                                      |
|           |                |         | 1271500 | 1271567 |        |                                                                                                                                                                      |
|           |                |         | 1272236 | 1272303 |        |                                                                                                                                                                      |
|           |                |         | 1272972 | 1273039 |        |                                                                                                                                                                      |
|           |                |         | 1273708 | 1273775 |        |                                                                                                                                                                      |
|           |                |         | 1274444 | 1274511 |        |                                                                                                                                                                      |
|           |                |         | 1275180 | 1275247 |        |                                                                                                                                                                      |
|           |                |         | 1275916 | 1275983 |        |                                                                                                                                                                      |
|           |                |         | 1276652 | 1276719 |        |                                                                                                                                                                      |
|           |                | 1277388 | 1277455 |         |        |                                                                                                                                                                      |
| TBsRNA-7  | 283            | 9       | 848025  | 848125  | 1      | AAAAACAGAGAACCCTGGTGGAGTTCTACAGCA<br>TCGGCAGTGAAAACAATATGCCACCGAAGAGCAA<br>CGAAGATTACGTGCCACCAAGGACAAGGCTGA                                                          |
| TBsRNA-8  | 913            | 9       | 848388  | 848473  | 1      | TTATGGTCGAGCGAAGGAAAGTTTAAACGAAAAC<br>GATCCAGTGCAAAGGGTAAAGAAAAGCAGGAATG<br>CGAAGGAATGGAAGAAAT                                                                       |
| TBsRNA-9  | 1091           | 1       | 689610  | 689661  | 1      | AGGGACGGTAGAAGCAGCAGCTGTATACCAATCG<br>GAGTGGCGTGGTTGCACA                                                                                                             |
| TBsRNA-10 | 275,218        | 11      | 2599303 | 2599454 | 1      | CGGGCGCAAGGATTTCCGATACTTCTGCATAGCA<br>AACAGCAAAGGGGCGTAGCTGTCCGCGAGGGAGG<br>GCACCGACGCCTTCCCCCACCCCGTGGCCCTCG<br>GCCGCACTGGACGCAAGTCCACCCCTGTCCGAA<br>GCCGCAATCGCCTT |
| TBsRNA-11 | 779            | 1       | 593360  | 593432  | 1      | ATCGGAGGCCGTGCGTGGCGTGCGCGGATTGTTG<br>TGCAGGTGTACTGCCGGCGTGTCCCGCTGCCG<br>GGTTG                                                                                      |
|           |                | 1       | 594943  | 595015  | 1      |                                                                                                                                                                      |
|           |                | 1       | 596535  | 596607  | 1      |                                                                                                                                                                      |
|           |                | 1       | 598121  | 598193  | 1      |                                                                                                                                                                      |
|           |                | 1       | 599707  | 599779  | 1      |                                                                                                                                                                      |

|           |      |    |         |         |    |                                                                                                                                                                                                                                                                                                             |
|-----------|------|----|---------|---------|----|-------------------------------------------------------------------------------------------------------------------------------------------------------------------------------------------------------------------------------------------------------------------------------------------------------------|
|           |      | 1  | 601291  | 601363  | 1  |                                                                                                                                                                                                                                                                                                             |
|           |      | 1  | 602875  | 602947  | 1  |                                                                                                                                                                                                                                                                                                             |
| TBsRNA-12 | 685  | 1  | 593736  | 593834  | 1  | TGATAGAGGACAGCATCTGTGAATGTGTGGTTACTCTTCTCCCTTTATCCCTAGCCTCTCCACTTCCAACCTCCCTCTGCCTCCTCTCACCCCT                                                                                                                                                                                                              |
|           |      | 1  | 595319  | 595417  | 1  |                                                                                                                                                                                                                                                                                                             |
|           |      | 1  | 596911  | 597009  | 1  |                                                                                                                                                                                                                                                                                                             |
|           |      | 1  | 598497  | 598595  | 1  |                                                                                                                                                                                                                                                                                                             |
|           |      | 1  | 600083  | 600181  | 1  |                                                                                                                                                                                                                                                                                                             |
|           |      | 1  | 601667  | 601765  | 1  |                                                                                                                                                                                                                                                                                                             |
| TBsRNA-13 | 1980 | 6  | 669222  | 669289  | -1 | CTCCAGTATCTCTGATATGTTTCGTGAAAAGAGAAAGCTATTTAAACGTTGCGTCTCTCAGCTGATTC                                                                                                                                                                                                                                        |
| TBsRNA-14 | 676  | 7  | 750112  | 750254  | 1  | GTTTCGTCTGCTCGGAAGGAGGAATAACGATTATCATCCAACAGTGAATATGAGCGGTTGGTGGCGCCTCAGGTGACACGGTTTGTTCGCAAGATTCTGTGCCGCCGCTTATTTGTTTCCGATTGAGCGCATATGCGCAGTT                                                                                                                                                              |
|           |      |    | 762781  | 762923  | 1  |                                                                                                                                                                                                                                                                                                             |
| TBsRNA-15 | 3924 | 8  | 1762421 | 1762718 | 1  | AACACACAATGGGGACCATCAGCCGCCCTGGAGGGATGCGGCCCTAAGTGGCACAGAAGCGCATAAAGCGCTTAAAGCGCCGACGACGACGATGCGCCAGCGCTCCAAGTAAGCGCCCTGATGTCATCGGTGAACA TTCCTCGTGGTGCCGTTTCAGTCTCTTTTTTGC GAGTTTCGCACGCCGAACCTCCCGATCAACGAAACGCATGCACATGTGCGTGCAACCTATTTATGGGTA CGGAAACAAGCATTGATGTCTTCCCTCCCTTTT TTCGTCTCTAGTTACCTTTCCATT |
| TBsRNA-16 | 3924 | 8  | 1762969 | 1763111 | 1  | AACACACAATGGGGACCATCAGCCGCCCTGGAGGGATGCGGCCCAAGTGGCACAGAAGCGCATAAAGCGCTTAAAGCGACGACGACGATGCGCCAGCGCTCCAAGTAAGTGGACAGTCGAAACCCTGAACGATCCCGC                                                                                                                                                                  |
| TBsRNA-17 | 283  | 8  | 1763124 | 1763185 | 1  | CAGTCTCGCTCACTTGTCTTGTGCGCGCATGGATT CGTGGCAGGGGAACAACCCCAAGTGTGTA                                                                                                                                                                                                                                           |
| TBsRNA-18 | 1176 | 8  | 1763478 | 1763627 | 1  | AGGATGGGGACCATCAGCCGCCCTGGAGGGATGCGCCCAAGTGGCACAGAAGCGCATAAAGCGCTTAAAGCGCCGACGACGATGCGCCAGCGCTCC AAGTAAGCGCCCTGATGTCATCGAAAGAGGTGCAATAAAGCGCGCTGGCGGCCCTCGCGGCC                                                                                                                                             |
| TBsRNA-19 | 1073 | 8  | 1763803 | 1763919 | 1  | CCTTCAGTTTTTTCCCTCTCATTCTTTGCTCCCTTTTTCGAGGCTCCTGCAATTTGGAATGGCTACGAGGTTTTTGAAGAAGTCAACTGCCAGAGGATGGG GGAAGAAGTCTAAAA                                                                                                                                                                                       |
| TBsRNA-20 | 132  | 9  | 1922622 | 1922720 | 1  | CTATATCAACCACGTTCCGGTTCATATGACCTCGTGGAAATCACTTCTGTTTCGTGCTCTTGAAGCATCAGAAGTGGCTGCGGTTTCTGTTTGTAGGGA                                                                                                                                                                                                         |
|           |      |    | 1919045 | 1919143 | 1  |                                                                                                                                                                                                                                                                                                             |
|           |      |    | 1926198 | 1926296 | 1  |                                                                                                                                                                                                                                                                                                             |
|           |      |    | 1933356 | 1933454 | 1  |                                                                                                                                                                                                                                                                                                             |
|           |      |    | 1929776 | 1929874 | 1  |                                                                                                                                                                                                                                                                                                             |
| TBsRNA-21 | 925  | 10 | 1823778 | 1823865 | -1 | AAGCAGTGTCTTCTGGGCGTTAGATGTCTTACAAA TGGGCGTTCCATTTAATTTGTAGCTCCTAACGCAAGTAAACACTGCGAGATTTT                                                                                                                                                                                                                  |
| TBsRNA-22 | 513  | 10 | 3228472 | 3228547 | -1 | GCCTGCAGCGGTAAGCACTTTTCTTTTAGCTCA CATTCCGGGATAGAGGGTTCTTAGTCTAATTGGGCAAGAACA                                                                                                                                                                                                                                |
| TBsRNA-23 | 858  | 6  | 226718  | 226873  | 1  | TTCCCTGCTTCAGATGGGCCCGCAGCTGAAGTTGTTTCGTGCGCTGCCCGCCACTGCTGCGTTGCTGCTGGAGAAACGATGTTGGAGGTTGACGGGTGTGTGCTTTTGAAGACTTTGTATGAATATGGAAGGAA GCTCGCAGCGTTACTACAG                                                                                                                                                  |
|           |      | 10 | 2480389 | 2480544 | -1 |                                                                                                                                                                                                                                                                                                             |
| TBsRNA-24 | 537  | 10 | 288923  | 289026  | -1 | CCTCTCTCCGATGCGTCAGCCACACCGCGACTCTGTGTTGAGGGGCTGCGTTGCGGTTGCTCGTGATGAGGATCTGCAGCCAGTTTCTTCTTTGGGATTGAA                                                                                                                                                                                                      |
| TBsRNA-25 | 869  | 11 | 4134243 | 4134299 | -1 | CTAATCCAAGACTTACCCATGTTATGGTTTTTGT TGGTTTTGCTGACCGAAGAGAGTG                                                                                                                                                                                                                                                 |
|           |      |    | 4140798 | 4140854 | -1 |                                                                                                                                                                                                                                                                                                             |

|           |      |    |         |         |    |                                                                                                               |
|-----------|------|----|---------|---------|----|---------------------------------------------------------------------------------------------------------------|
| TBsRNA-26 | 6415 | 11 | 3893229 | 3893298 | -1 | CCATCCGTTGCCGTAAAGTTTCGTTTACTGGTTG<br>TGGTGTGTTGGTGGCAGTCAGAAGAAGTGAGATG<br>TA                                |
| TBsRNA-27 | 798  | 11 | 2704498 | 2704584 | 1  | ACATGATGCTCTGCCGTTGTTATACTCGCTATGC<br>ACGAAGTTGGTACTCTAGTCTGTTTGACCTTGAT<br>GAGTTGCCTGCTTTGGTAT               |
| TBsRNA-28 | 148  | 11 | 2704117 | 2704215 | 1  | ACCGCGACAGTTTATTTTGTAGTTTTTGGCCCTTTA<br>TGGTTTATCTCTATGAAAACGTGCGAAGATTAAG<br>GGAAATAATGGCGTGAAGCTCTGCTGCTCGT |
| TBsRNA-29 | 536  | 11 | 1666815 | 1666870 | -1 | AAACGTAGGAAGCAAACGGGGACGGAAGACAC<br>CGTAAGGATGCTGTCATCTTT                                                     |
| TBsRNA-30 | 276  | 11 | 2099249 | 2099338 | -1 | TTACCTGGAGGCACTCGGCAATGACATTATAATG                                                                            |
|           |      |    | 2100435 | 2100524 | -1 | TTCTGTCATCCACTGGTGATACGAAAATGACCCC<br>GGGAGAGGATGGCGGCACGACA                                                  |
| TBsRNA-31 | 1420 | 11 | 517081  | 517168  | -1 | AAGGCTGCTCCAAGAAGGCTGTCGCTAAGAAGG                                                                             |
|           |      |    | 533986  | 534043  | -1 | CTGCTCCAAGAAGGCTGTCGCTAAGAAGGCTGC                                                                             |
|           |      |    | 762781  | 762923  | 1  | TCCCCAAAAGGCTGTTGCCA                                                                                          |
|           |      |    |         |         |    |                                                                                                               |

**S-9. List of novel ncRNAs identified in this study.** Each novel small RNA was named sRNA 1-31 and is listed along with its genomic location (chromosome, start, end, and strand), and sequence.

S-10

| Sequence                                                                                                                                                                                                                                                                                                                                                                                                                                                                                                                                                                                                                                                                                                                                                                                                                                                                                                                                                                                                                                                                                                                                                                                                                                                                                                                                                                                                                                                                  | Kolev et al.2010, ID           | snoRNA                                                              |
|---------------------------------------------------------------------------------------------------------------------------------------------------------------------------------------------------------------------------------------------------------------------------------------------------------------------------------------------------------------------------------------------------------------------------------------------------------------------------------------------------------------------------------------------------------------------------------------------------------------------------------------------------------------------------------------------------------------------------------------------------------------------------------------------------------------------------------------------------------------------------------------------------------------------------------------------------------------------------------------------------------------------------------------------------------------------------------------------------------------------------------------------------------------------------------------------------------------------------------------------------------------------------------------------------------------------------------------------------------------------------------------------------------------------------------------------------------------------------|--------------------------------|---------------------------------------------------------------------|
| <p>&gt;lcl Tb927_03_v4:255259-255636 No definition line found<br/>                     GCCACATAACACCCCATCTATTTAGCTAACAGTAAAGCAAATAAAAAAATTATAGATATTGGAGGCCATGAGTTTCATAT<br/>                     GCTGCAAGGAAATCGAGGCAGTAATGGCATTCCCAGGGAAAGCGAAGAAGGAAAATATTTCTCCAGCTTGTGGACAGAT<br/>                     CCCAGTCGCTACGATTTCTGCCATGATGCGGTGTTGGCGCCACCACCGCTACCACAAAATGAAACCA<b>CTGATGACTATAA</b> TB3Cs1C1<br/> <b>CGTTTCACTCTTGTTCGTAGGAAATGTCTTGACGAAACTTATACTTCGTTTGATTCTGA</b>ATTATTTATTACTTCCTTCACA<br/>                     CCCTATCATTCGTCGCCCTTATTTACTCTTTCCGTTGGAACAATGATGTGAATCTAT<br/>                     &gt;lcl Tb927_03_v4:651407-651967 No definition line found<br/>                     TTCATGATATTGTTCAATGGGACGCCGACGCGCTAGGACCGTGGAGGCATCCCCGTGGCGCTACCAGTGCATATTTAT<br/>                     AGGGGGAAGGAGGAGGAAAGGAAGTGCACCGGTTCCCTTATTGGCCGCTCGAATGGCTGAAAGAATGCTCGAGTAT<br/>                     GTTGAAGTTAGTATCTGTAATCACCTTCATTCAGGGACTGGTAGTGCCTTCAGCAGATTATGCACCTATTTCCCTCCC<br/>                     ATTTTGTACTGTACCCTTAGCAATGGAACATTCAGTTGGATTGTTTCGTGTGTGTGACCTAACAAAGTTGGGTGTG<br/>                     GAAAAGCGCGCCCATGTTATTGTTTCACTGGAAGACCCTTATCCTACCAGCGGGCTCACAGTGTATCGGCACCACCGC<br/>                     TACCACAAAATGAAGCCA<b>CTGATGACTATAACGTTTCACTCTTGTTCGTACGAAATGTCTTGACGAAACTTATACTTCGTTT</b> TB3Cs1C1<br/> <b>GGTTCTGA</b>GTTATTTATTCTTCCCTTCGCACCTATCATTCTGCACCCCTTATTACTCTTTCTGTTGGAACAATGATGT<br/>                     G</p> | <p>Tb3.NT.16<br/>Tb3.NT.31</p> | <p>TB3Cs1C1</p>                                                     |
| <p>&gt;lcl Tb927_03_v4:1159436-1160156 No definition line found<br/>                     ACGGAACCTCTATTACAAGCTTACGCTGCCGATGGCCGTACAACCTTGAAGCTGATGCATTTGGCGTACCCTCAGCGTTTCC<br/>                     GTGCTCACCTTTATCCCCCCTCTCCACACCACCCACATGGCATAACATTTACACAACCGTTTGGCCATTAACCTTGTA<br/>                     CGCCTTCGCTTTTTTCTTTGTAACGCTGCGATGTTGACAAAATCGCGACAGCGGGGAGCACAGTTTTCCCTTCGAGGCAA<br/>                     AGCGCTAGATCCACAACTACCCGTTGTA<b>TAATGAGGGTCTAAGAGCTGGGGACCGGAACCTTTCCATGTTCTTCCAGT</b> TB3Cs2'H1<br/> <b>GTCATTGCCCTCAGAGATCGAGAC</b>GTGCAACAACGAAAATTTGCGCTAAACATTTTAGTACCGCTGCCAGGAGGTGCCATC<br/>                     ACGAGGGAGCTCCCGAACACTTAAAGACTGCCGTGTCGGGGGAGGAAATGCAAAGCATCGCATAAATGAATCAAATAAC<br/>                     AATGCTGGTAATCGTGTCT<b>GCAGCAGAGATGTTGAGGGGCTTTGCTGCACGAAGTGTGGCCACAATAGCAAATACTG</b> TB3Cs2'H2<br/> <b>CGCCATAGGTACTCTGCAAGAAAT</b>GAAGACACTCCCTCCCCCAAGAATATAAAAGAGTTTAAAGATGAGCATTTTTT<br/>                     CTTTTTTAAAAAAGCAGAAGCGACAATAATTAACAGCAAACCTGTGTCGGCATAGCCATTAGCAATCAACTACTCTT<br/>                     C</p>                                                                                                                                                                                                                                                                                                                                                                                     | <p>Tb3.NT.52</p>               | <p>TB3Cs2'H1<br/>TB3Cs2'H2</p>                                      |
| <p>&gt;lcl Tb927_07_v4:1059609-1060315 No definition line found<br/>                     TGGTGAGTGGAGTGAACAGTTCAGCAAAACCTGCGTGACTTTTTCGTTGTAGAAAGTAAAAGAACGGGGACTCTAGGT<br/>                     ACAGTTTTTCATTTGTCGCCACTTCATGCTCATTTCTCAGAAAGGTCTGAATGATGCCCCATATGGATCATTGCTGCCCA<br/>                     CCGTCAGTGACGTAAGTGAATGCTCATTTCCGCTAAAGGGTTTTCCAACCTCCCTTTTCGGTTACCCCTTCCCGTTGTCATTG<br/>                     TCATAAATGTCATAGTTATTATAATTATTGTCATTACCTCCACTCTTTTTTGTGTTGCTTACGGGGGACGTCACGA<br/>                     ATGGGTAGTCAGTGCAGTCCCGCTTCAAGTCATAGGCCACCGTGGCGTTACCCCATTCGAAGAGCCGGAGTGGTCTA<br/>                     AAAAAACAACAACAACAACACCCGCTTTCGTGTGCACCGCCCTTACCCAGTCTGCCTACG<b>GTGATGAAAATAC</b> TB7Cs1C1<br/> <b>ATGTATATGCTAACTTTCTGTACTCCATGGAGTGAGCATGAAGTGAATTAFCGCGAGAGAAGTCTGAAA</b>CGTTTTTAAA<br/>                     TCCCCCCTGTACTCTCTTCTTCTTGTGGTTTCCATCTCAGTACTTCGATGCTTGGTATGACACACGAATACTCGGTG<br/>                     TTACTCAGACGTGGTGACGAAGTAACGGATACTTTCTTTCATCACAGCGCTTGTGTTGTTTCTTT</p>                                                                                                                                                                                                                                                                                                                                                                                                                                          | <p>Tb7.NT.42</p>               | <p>TB7Cs1C1</p>                                                     |
| <p>&gt;lcl Tb927_08_v4:513118-513754 No definition line found<br/>                     GTAATTAGGTTTAAAGGCATGCCATAGCTCCTCACTTGGAGTCAACTTGTGATCCGTAGCATGTGGAGCGGGATGTG<br/>                     AGAGTCACACA<b>AAACGAGGGACATCGTCGGGGCTCTGATTCAACTTCTGTGGGGCCAAACCGAAACAACACCTTCGAAGA</b> TB8Cs4H2<br/> <b>TAT</b>ACTTCGTTGTTGTTTTGTTGTTTACACAATATTGCTTTTTCTCCGTTACTTGGGCTAATAAGTTACCTGCC<br/>                     TGTACGTCGACCGCTACCTTTACGTGCACATTTCACTTCCGCTATGCGCACTTGCAAACTTACACTTATGTAGTA<br/>                     TATGTTACACGTTGCTTTTTGTTTCTTTCTTATTTCAGTGTGCTACACGATGGCTTCCAGCATATTTAACCT<br/>                     GGTACCTTTGGCAGTTAGTAAGGCCACCACCGATGCCAACCCCACTGCCTGAGGAGGGCTTTACTGATTATAAAAAA<br/>                     CAAAACAGGAGCAAGAAGGAACAAAATATTAGAAAGAAAGCGGCAGGAGGGGGGGAGGTGAGAGGAAAGAAAGATG<br/>                     GGAGTCTTAACCTCTGCGAGTATTAGTATCAACCTTTCTCATCGCTCTGAAAGGATTATGTTTTGCGGTGTTG</p>                                                                                                                                                                                                                                                                                                                                                                                                                                                                                                                                                          | <p>Tb8.NT.22</p>               | <p>TB8Cs4H2</p>                                                     |
| <p>&gt;lcl Tb927_09_v4:615962-616620 No definition line found<br/>                     AGAACAAATATGTTAGTTCCCAACGGGCATGACTGCTTCCACTTGGGTTCCCTGAGGCGTGTGAGAGTGTGAGTGTGTAC<br/>                     AGCACAGAAAATGAAGCTAGTTATGGCGTACCCTGCTGCTCTAGTCCGACACTGTGCGAGATGCGTTATTTGTACCT<br/>                     TCCCCAGGAGTGTCTGCTTATGTTTAACTAATCCTTTCTTACCCTCTGTGCTTTCTTGATTTGAACCTACTCTCTCC<br/>                     CCTCCATGCATTCAAGGCAC<b>AAACACGGGCAATCCGAGGTCACTGAGCTTCACTTCGTGCCGATGATGCCTTCTGGTGG</b> TB9Cs1H2<br/> <b>CTCCGGAGAAG</b>ATGTTGTTGGTCTGCTTCG<b>TGATGA</b>TCCCGCAACTGAGTGTACCTTTTTTTCAGCACTTTTCGTGCAATG TB9Cs1C1<br/> <b>GAATGTAATGGCAGGTGCCCTCTTGTGTTGGTGTACTGATAGCAGATTTAACGGGAAACGTGCTGATATAGTTGCCTTC</b><br/>                     ACTACAGTGATATCAACTTCTCC<b>GTACACTGAGAACCGCTATTAGCTCCCAACGGGTATGACTGCTTCCACTTGGGTTT</b> TB9Cs1H3<br/> <b>CTGAGGCGTGTGAGAGTGTGAGTGTGTACAGCACAGAAAATGAAGCTAGTTATGGCGTACCCTGCTGCTCTAGTGCCG</b> TB9Cs1H1<br/> <b>ACACTGTGCGAGATGCGTT</b></p>                                                                                                                                                                                                                                                                                                                                                                                                                                                                                 | <p>Tb9.NT.99</p>               | <p>TB9Cs1C1<br/>TB9Cs1H1<br/>TB9Cs1H2<br/>TB9Cs1H3</p>              |
| <p>&gt;lcl Tb927_09_v4:1865684-1867813 No definition line found<br/>                     AATTAAGACAAAAGATTCAAGAGGCACAAGAAGTGGATATCACTGTTTATGATTGTGCTGGTTTTGTTTTCGTAAGCGC<br/>                     GTATACAAAT<b>TACTGATGATATAACACGATATTCAGGTAAGATATTCAGGAGTAACGACTGAGATAACATCATGCACC</b> TB9Cs3C1<br/> <b>ACTCTGACCA</b>ATACTTCTCCCTACTGTGGTTATGGAATATGTTTCC<b>TCCATGATGCCATGACAAGACTATAAGAGCAC</b> TB9Cs3C2<br/> <b>AGTTTGAAGTCACTTCAACAAGCGGACGAGAACCTGCTGCAATATTCTGATGA</b>TTGGAAGGCATATGGGTGAATATAT<br/>                     GTGACAGTGAA<b>GCACAATTTACACGGATTACCCCTGACTTATATTTTAAATGCCGGTGTATCCGCCAGTGTGTGCCAGA</b> TB9Cs3H1<br/> <b>TAT</b>ATCAGCTGTTTCT<b>CTATGATGTTAAAAGAAGTTTTGTAGTAGGGTAAAATCTGACATCCGACCATGAAGGTACGAA</b> TB9Cs3C3</p>                                                                                                                                                                                                                                                                                                                                                                                                                                                                                                                                                                                                                                                                                                                           | <p>Tb9.NT.106</p>              | <p>TB9Cs3C1<br/>TB9Cs3C2<br/>TB9Cs3C3<br/>TB9Cs3H1<br/>TB9Cs3H2</p> |

|                                                                                                                                                                                                                                                                                                                                                                                                                                                                                                                                                                                                                                                                                                                                                                                                                                                                                                                                                                                                                                                                                                                                                                                                                                                                                                                                                                                                                                                                                                                                                                                                                                                                                                                                                                                                                                                                                                                                                                                                                                                                                                                                                                                                                                                                                                                                                                                                                                                                                                                                                                                                                 |                 |                                                                                         |
|-----------------------------------------------------------------------------------------------------------------------------------------------------------------------------------------------------------------------------------------------------------------------------------------------------------------------------------------------------------------------------------------------------------------------------------------------------------------------------------------------------------------------------------------------------------------------------------------------------------------------------------------------------------------------------------------------------------------------------------------------------------------------------------------------------------------------------------------------------------------------------------------------------------------------------------------------------------------------------------------------------------------------------------------------------------------------------------------------------------------------------------------------------------------------------------------------------------------------------------------------------------------------------------------------------------------------------------------------------------------------------------------------------------------------------------------------------------------------------------------------------------------------------------------------------------------------------------------------------------------------------------------------------------------------------------------------------------------------------------------------------------------------------------------------------------------------------------------------------------------------------------------------------------------------------------------------------------------------------------------------------------------------------------------------------------------------------------------------------------------------------------------------------------------------------------------------------------------------------------------------------------------------------------------------------------------------------------------------------------------------------------------------------------------------------------------------------------------------------------------------------------------------------------------------------------------------------------------------------------------|-----------------|-----------------------------------------------------------------------------------------|
| <pre> TTTAAATGTGCTTTTCATGTGCTTCTGCTATTGTGGTTGCACAGAGGCGCTATGTCTGAGAAATTTCTATCTTTCTCCACTTC TTTACTTACTTTCTCTCTTACTGCTTTACTCCCACTAATTTTTAAATCGTTGTACAACCTGCTTGGTTCCAGTGGCC TB9Cs3H2 TCAGGTATTGTGGTGTGTTGGTGTATCCGCAATCACAGGTTTCAAGAGCCACAAGAAGTGATATCACTGTTTATGATTGT GCTGGTTTTGTTCGTAAGCGGTATACAATAACTGATGTATAACAGATATTCAGGTAAAGATTATCAGGAGTAACT TB9Cs3C1 GACTGAGATAACATCATGCACCCTCTGACCAATACTTCTCCCTACTGTGGTTATGGAATATGTTTCCC TCATGATGC TB9Cs3C2 CATGACAAGACTATAAAAAGCACAGTTTGAAGTACTTTCACAAGACGGAGGAGAACGTCGCTGCAATAATCTGATGATGG AAGGGCATATGGTGAATATATGTGACAGTGAAGCACAATTTACACGGATTACCCCTGACTTATATTTTTAATGCCGGTGT TB9Cs3H1 TATCCGCCAGTGTGTGCCAGATAATACAGCTGTTTCTCTATGATGTTAAAAGAAGTTTGTAGTAGGGTAAAATCTGA TB9Cs3C3 CATCCGACCATGAAGGTACGAATTTAATGTGCTTTTCATGTGCTTCTGCTATTGTGGTTGCACAGAGGCGCTATGCTGAG AATTTCTATCTTTCTCCACTTCTTTACTTACTTTCTCTTCACTGCTTACTCCACACTATTTTTTAAATCGTTGTTA CAACTGCTTGGTTCCAGTGGCCFCAGGTATTGTTGGTGTGTTGTTGCTTATCCGCAATCACAGGTTCAAGAGCCACAAGAAGT TB9Cs3H2 GGATATCACTGTTTATGATTGTGCTGTTTTGTTTCGTAAGCGTGTATACAATAACTGATGTATAACACGATATTCAG TB9Cs3C1 GTAAGATTATCAGGAGTAACTGACTGAGATAACATCATGCACCCTCTGACCAATACTTTTCCCCTACTGTGGTTGTGG AATATGTTTCCC TCATGATGCCATGACAAGACTATAAAAAGCACAGTTTGAAGTACTTTCACAAGACGGAGGAGAACGTC TB9Cs3C2 GCTGCAATATTCTGATGATGGGAAGGCATATGGGTGAATATATGTGACAGTGAAGCACAATTTACACGGATTACCCCTG TB9Cs3H1 ACTTATATTTTAAATGCCGGTGTATCCGCCAGTGTGTGCCAGATAATACAGCTGTTTCTCTATGATGTTAAAAGAAGT TB9Cs3C3 TTTGTAGTAGGGTAAAATCTGCATCCGACCATGAAGTACGAATTTAATGTGCTTTTCATGTGCTTCTGCTATTGTGGTT GCACAGAGGCGCTATGCTGAGAAATTTCTACTTCTTCCACTTCTTTACTTACTTCTCCCTTCACTGCTTACTCCCA CACTATTTTTTAAATCGTTTACAGTGCCTTGGTTCCAGTGGCCCTCAGGTATGTTGGTGTGTTGGCTTATCCGCAATCAC TB9Cs3H2 AGGTTCAAGAGGACACAAGAAGTAGATATCACTGTTTATGATTGTGCTGTTTTGTTTCGTAAGCGGTATACAATAATAC TGATGTATAACAGATATTCAGGTAAGATTATAATGAGTAAATGTAAT </pre>                                                                                                                                                                                                                                                                                                                                                                                                                                                                                                                                                                                                                                                                                                                                                                                     |                 |                                                                                         |
| <pre> &gt;lcl Tb927_09_v4:1822081-1822986 No definition line found TAGTGTGATTAACATTTGTTTACAGTGCACGTGGATGTTATTGATGGCTCCCTTTTCGGAACGCACATCTCCCGATGG TTTTCTTTGCCCATTTTTCGCTCAACATTTTATTGCGAGTGTAGAGAACATGGAACATATGCACGTTTATATGATAAGGCA TB9Cs5C1 ACTTGATGACTTACACACGCTTCACTAAATATCGTACGAGCGATTACTGATCAACACTTCTATCTCCCTCTCTTTCCAG AATGTATATGCACGAGGAGTGTGTGTAATAATCTCTACCTCTGTTTTGTTTCTCACACACTCTCTCTATACCCCAA TTTGAGCGGTACACACATTTTGCATACATACGTACTGGGCACTGTGTTGGTGTGATGTTTTTTTTTAAATTTTGTCT TTGGCTCCTTCTGCCATTCCTTTATTTGCAAGTGCACATCTCACAAAGCCGGCTAAGAGTCAATCCCGTGGTCTTATC TB9Cs5H1 GTGTACCAGGTAATGTAGTAACTACGGCAAGATATATGCATACAGCCGATGTGTATGATGCACATTGGAATGCGTAT ATCCATAGACATTACAGTATGTGTGCTTGCATGTGTAAGGCATGATGACGAAACAATTTTGCACCTCAGTTTGAATTAG TB9Cs5C2 CAAAATGTGAAGATGAAATGACACAGCTATTTTATGGGCTGTCTGATCTCAGACAGACGTTTATAAGCGGACGCTTCT CTCCTTTCTTTTCAAGGGCGGAGTGTCTAAGGACATGTGACTTATAACAATAGTTTTTATGACTACCTTATTGGCCCTCCCT TTCTTTCCCTCCCTCTGCCTTGTCTTTTACATGTAAACACAAGCATGTTTATGTTATCATATAAATTAGCACTTATAT TTACTGTTTATGTGTGTTGATTGTT </pre>                                                                                                                                                                                                                                                                                                                                                                                                                                                                                                                                                                                                                                                                                                                                                                                                                                                                                                                                                                                                                                                                                                                                                                                                                                                                                                                                                                                                                                                                                                                                                                        | Tb9.NT.105      | TB9Cs5C1<br>TB9Cs5C2                                                                    |
| <pre> &gt;lcl Tb927_10_v4:1728986-1731333 No definition line found TATATGTACCGTAGCACCAACGAATGCCACCACCCTTGTGAGAAATGATGAGATTGCCATCATACTATTGGAAGACGA TB10Cs1C4 GTCTGAACCCCTGATGCATTTTATCATGCGGCACTGACGATCTTACATTGCGGTTAGTTGTGATCCCTTTGCCCATGTGTT TTTGTATCTGCTTGCAGGAACGTGGCAGGCGCCGAGGTCACACTCGTGTCTGCGGTGGTTCAACAACATGTTCCAG TB10Cs1H3 TTGTAGGTTCTTTGTTACTGGTGTGTATGATGAGAAACCTATTTTTATGTAACCTCGGAGAACTGAGCATATTACCTGAT TB10Cs1C1  GAGTAAACAATCAATCGTTAGATAGTAGACTGATGTTA CCTCTGGTTTTATGTGTGTTGTAACCTTCCACTGTTGTC TA10Cs1H1 TTATCATCCCCCTTTAATAGCGAGTGGTCTTTGTGTGCATCTCCGCAAACCACTCGTCTACACCGGGGAAAGATAACGA GTGGAATGTTGTTAGTGTGTGTGCTGTGTCGCTACTAGTAAAGGATGATGAGGATGCGGCCACCCACGCGAGCT TB10Cs1C2 (MRP) GATGCGGTGTGTTGTTGACACTGCAGGCGTGTAGTTTCCCCTCCGCTGCCGTTGCAAAAGCAAACCAATTTTGGGCAACA TACGCAGCGCGCGCCACAAGACGCTCCACCGCTCGACGGGTGCCGCCATGACGCGGGTCCGAGCCAAAGTCCCTCG CCGAAATTTCCGAAGGAGTGTAGTCTGCTGCGGTGGGAGACCTGCGCGCAGTAAACCTCGTCCGCTGGCGGTGCGGGG GCCACCGGCTGTGGTGGTTGATCCCCTCTGGTGGATCCACAGCAGCAACTACGCGGGCCGTACTTTGCTGGTGCAGAGA CTCCCCACCCGTTGGTATGAAATGGCGGGCACCCTGAGTACAGTATAGCCATGAGCGGCATGTGCAGAAAGAGGGCTTAC AAAGGAGGACGCGGAGCGAGCGAATGGTAAACACTGGCGCGTGCAGAGAAAGCAGCATATTTACCGCATCCGTTTG CGGCGTGTGGTGGCACCCCGTACTGTCATATGCGTTCACATTCACCTCCTCTCTTTTCTCATTTTTTATCCCCCTAC TTGAGAACAGATAACAACCTACCCACCTTGCCATACCCCTTACACACCTATTATGATTGTACCTGCACCATCAGTGA TB10Cs1C3 TGAGCATCAATTCACATCGCGCACACCGATGATTCAAAATGAGTACGCTACGAAATGGAATAAATTAATTCGAGAAAGAA CAGCTGAGATGCTACGTGCTTGTGCGCTTGTGCTACTTCCCCTTGTAGTCCCCCTTCTATACCTGTGTCGTGCTCAT TCCATCTTAATCGAAGTGTGTTCTGTTCTGATGACAGCACTCATTTCAAGCTGCGCGAGCATAAGCGTGTGCTCCG TB10Cs1H2 TGGTCCGGTGACGTGCCAGACACCGCTCACACCTATTACTGTGATGGGTGCCACTAGCCTGTGTGAGAAATGATGATT TB10Cs1C4 GCCATCATACTATTGGAAGACGAGTCTGAACCCCTGATGCATTTTATCATGCGGCACTGACGATCTTACATTGCGGTTAGT TGTGATCCCTTTGCCCATGTGTTTTTGTATCTGCTTGCAGGAACCTGGCAGGCTACCGAGGTCACACTCGTGTCTGCG TB10Cs1H3 TGGTTCAACAACATGTTCCAGATTAGGTTCTTTGTTACTGGTGTGTATGATGAGAAACCTATTTTTATGTAACCTCGG TB10Cs1C1 GAGAAGCTGAGCATATTACTGATGAGTAAACAACTAATCGTTAGATAGTACACTGATGTTA CCTCTGGTTTTATGTGTG GTTGTAACCTTTCCACTGTTGCTATTATCATCCCCCTTTAATAGCGAGTGGTCTTTGTGTGCATCTCCGCAAACCACTCGT TACACCAGGGGAAAGATAACGAGTGGAAATGTTGTTAGTGTGTGTTGCTCTGTGCTTTGAGTTGCCCTCCGTTGTTCTTA ACCTCAGACTCTGCTCTTACAGTTTCCGGTTTTATCGTTTTTTTTTCTTTTGCCTTCATGTAATAATCTTTTTTTTTATCC TCTTGTGTGAACCTTGTACGGATGCTTTCCATCAGGTTACAACATAAGTGAAGTGTGATTTTTGTGATGTAATGGGTTT TCGCGAGTGCAGCTGGCCGTTGACCGGTTTTGATCATATAACGAGTACATTTAGCGCTTCATGATGTTTGTCTTGGCC GACGGTGTGGCACTGCAGAACGGACAAGCTAACGTATCTGTGCTATGTTTTTGTCTGTACGTGCATATAAGATTTGTTT ACCCGAGTTATATATTTGTTTGTGTT </pre> | Tb10.NT.18<br>2 | TB10Cs1H1<br>TB10Cs1C1<br>TB10Cs1C2<br>TB10Cs1C3<br>TB10Cs1C4<br>TB10Cs1H2<br>TB10Cs1H3 |
| <pre> &gt;lcl Tb927_10_v4:3810708-3811435 No definition line found ATATGTATACACACACACTCTCTCTCTCCGAATGCCAGGCTTTCTGTCTGTTCCGGTCCGTTGATTAGCAGTG TB10Cs3C5 </pre>                                                                                                                                                                                                                                                                                                                                                                                                                                                                                                                                                                                                                                                                                                                                                                                                                                                                                                                                                                                                                                                                                                                                                                                                                                                                                                                                                                                                                                                                                                                                                                                                                                                                                                                                                                                                                                                                                                                                                                                                                                                                                                                                                                                                                                                                                                                                                                                                                                                   | Tb10.NT.18<br>7 | TB10Cs3C1<br>TB10Cs3H1                                                                  |





|                                                                                                                                                                                                                                                                                                                                                                                                                                                                                                                                                                                                                                                                                                                                                                                                                                                                                                                                                                                                                                    |                          |                                                                                                                 |
|------------------------------------------------------------------------------------------------------------------------------------------------------------------------------------------------------------------------------------------------------------------------------------------------------------------------------------------------------------------------------------------------------------------------------------------------------------------------------------------------------------------------------------------------------------------------------------------------------------------------------------------------------------------------------------------------------------------------------------------------------------------------------------------------------------------------------------------------------------------------------------------------------------------------------------------------------------------------------------------------------------------------------------|--------------------------|-----------------------------------------------------------------------------------------------------------------|
| <p>CGCAATGAGGCCAAA <b>CGATGAAAAATAAATGGATCGCTGACTCTGAACACATTATCTGATTGACAGGACATTTCTTTGAC</b> TB10Cs2"C2<br/> <b>TATACCTCTGAATT</b>GTGCCCCACTTCTCTCTCCATTCTCCCTCTTTCTGTTGGTTTCCCCCCCCCCCCCTCTGCTGCT<br/> GCCACTACTATTCCCTCCAGGTGTCTATTGCTCCTGGTGCATTACCATTAACTGCGGTA<b>TGATTACAAAGCAATTTTATCC</b> TB10Cs2"C3<br/> <b>TCACCCGTGACGTGAGTGGTTCTGTGACGAGAAACCGATTGACAATAATACCAAGATCTGCTATGAGCCCGTGATGTTGTG</b> TB10Cs2"C4<br/> <b>TGCAGACGCTGTATTAATCCCGCCCCGATGGCAAACCTCATGCCCGGGCGATTTCATGCACAGCGGAGATGCGTATTGTC</b><br/> TCACTTCCCTTATCGTAAAGTCCACTTCTTTCTCTGTTGCGTGCCTGTTTCAAATGTACGCCCGCGGGTTTTGTGAAT<br/> GAGGCTCCCCATTCGGTGTGTTGTCGGGTAATCTGGTTTTGTGCGTGGCGGGTGTGCGCTGCGTTTAGTAGACGTT<br/> AACCGATGGAGTTGTTACAAACCCCCATTTATTCCGATTTCGCTATTCCGCAGGGCGGTGGTTTAGCTCTTCGAGCACAT<br/> TTGT</p>                                                                                                                                                                                                                                         |                          | <p><b>2</b><br/> <b>TB10Cs2"C</b><br/> <b>3</b><br/> <b>TB10Cs2"C</b><br/> <b>4</b></p>                         |
| <p>&gt;lcl Tb927_11_01_v4:4208173-4208926 No definition line found<br/> CTTCATAGTACGAAAATTTCTGAACCTTTGTTCGTTTCGGCGATCGTGCATCGCACG<b>TGTTGAGTGTGTGCGTGCCTGG</b> TB11Cs5C1<br/> <b>GTGATGCTTTTTGTGGAACTCCAACCTGTACCTGCCGGGTGCGGGAACGAGATGCCCGGGAGCTGA</b>ATTCTCCCCCGC<br/> TCCCTCTTTTTGCTCAACACCCACCAACCCAGCCCTTTCTGTGCGGTAGCTTGCACAATGGTGGCCAAAGTGTGGTGTG<br/> AGATTTTTGGCGACC<b>CAAGCAGCATCAGTACAGCGGTGGTATCGCTAAGGCACCATGATACTTTCCGCTGGCGATGTGGC</b> TB11Cs5H2<br/> <b>GAGATAC</b>TATCGGAGGT<b>TGCTGTTTTCTGCTTCCTTGGCTTTTTTCCCTCTATTTGCTGTTCTTTTCGCCTACAAAGT</b> TB11Cs5C2<br/> <b>TCCCGCGGTGACCTGATGC</b>TTCCCTTAAGGTCAGTTCGAAGGCCAGTACTTGTACCATTGTAAGTGCAATGTGGTCA TB11Cs5H3<br/> <b>AAAGCTGACCAAGATTTGTTAATTTGTGCTCATTGTGTGCATGAATGAGAAATGCTCTATCCGTTTCTGACATTTT</b><br/> ATTGG<b>CTCAACACCCACCAACCCAGCCCTTTCTGTGCGGTAGTTTTCCACAATGGTGGCCAAAGTGTGGTGTGAGATTTT</b> TB11Cs5H1<br/> TGGTGACC<b>CAAGCAGCATCAGTACAGCGGTGGTATCGCTAAGGCACCATGATACTTTCCGCTGGCGATGTGGCGAGATAC</b> TB11Cs5H2<br/> GTATCGGAGGTCACTATTGGAATTTTCATATTGG</p> | <p>Tb11.NT.20<br/> 1</p> | <p><b>TB11Cs5C1</b><br/> <b>TB11Cs5C2</b><br/> <b>TB11Cs5H1</b><br/> <b>TB11Cs5H2</b><br/> <b>TB11Cs5H3</b></p> |
| <p>&gt;lcl Tb927_10_v4:2872888-2873319 No definition line found<br/> GACAGAATTATAGGTTCAATAACGGAAGGAAAGTTTGTGAATGCAGCAAAGGCAAGATATGTGAACGAGCTTCAACCACA<br/> GAGGTGCTATAAATTTAGGAGGCTGCAGGGCCAAGCTGGCGCTTTCTCTTTCCCTAAGAGGAGAAGGGAGCGCTCCATGT<br/> GACGCCAAACAAAAGTTCATTCACCTCCCGTTCGCATCCTGTGTGATTCCCTTTCTAACAAAACCGT<b>GCACGTGATGAGA</b> TB10Cs2"C1<br/> <b>GTATGTTCTTTCTATATACTGATTTGTCCATTGAAGTACACAGATACATATTCATAGACTGTCGTTTTCCCTGACC</b>GCATT<br/> TCCACCGTTTTCCCCCTCTTTGGATGGATTGATTCGATAAATCTTTCTGTTGTGGTCTTTTCCACACCCCTGCGTTACA<br/> TGTACCATGCAGTTGCTGTTGAGCTGCATCG</p>                                                                                                                                                                                                                                                                                                                                                                                                                                                    | <p>Tb10.NT.13<br/> 2</p> | <p><b>TB10Cs2"C1</b></p>                                                                                        |

**S-10. Summary of published snoRNAs found in the Kolev *et al.* 2010 dataset.**

Comparison between the published snoRNAs and the novel transcripts identified in Kolev *et al.* 2010, revealed several snoRNA clusters that are present in these polyadenylated transcripts. Each snoRNA is listed with its TB-sno identifier along with its corresponding identifier and sequence from the Kolev *et al.* 2010 dataset. The sequence of each snoRNA is highlighted within the novel transcript.



|                                                                                                                                                                                                                                                                                                                                                                                                                                                                                                                                                                                                                                                                                                                                                                                                                                                                                                                                                                                                                                                                                                                                                                                                                                                                                                                                                                                                                                                   |             |                          |
|---------------------------------------------------------------------------------------------------------------------------------------------------------------------------------------------------------------------------------------------------------------------------------------------------------------------------------------------------------------------------------------------------------------------------------------------------------------------------------------------------------------------------------------------------------------------------------------------------------------------------------------------------------------------------------------------------------------------------------------------------------------------------------------------------------------------------------------------------------------------------------------------------------------------------------------------------------------------------------------------------------------------------------------------------------------------------------------------------------------------------------------------------------------------------------------------------------------------------------------------------------------------------------------------------------------------------------------------------------------------------------------------------------------------------------------------------|-------------|--------------------------|
| <p>GTGTACCAGGGTAATGTAGTAACTACGGCAAGATATATGCATACAGCCGATGTGTATGTATGCACATTGGAATGCGTATATCCATAGACATTACAGGTATGTGTGCTTGCATGTGTA<br/> <b>CGGCATGATGACGAAACAATTTTGCACGTCAGTTTGAATTAGTB9Cs5C2</b><br/> CAAATGTGAAGATGAAATTGACACAGCTATTTTATGGGCTGTCTGATCTCAGACAGACGTTTATAAGCGGACGCTTCTCTCCTTTCTTTCAAGGGCGGAGTGTAAAGGACATGTTGACTTATAACAATAGTTTTTCATGACTACCTTATTGGCCCTCCTTTCTTTCCCTCCTCTGCCTTGTTCCTTTCACATGTAACACAAGCATGTTTATGTATCATATAAATTAGCACTTATATTTACTGTTTATGTGTGTTGATTTGTT</p>                                                                                                                                                                                                                                                                                                                                                                                                                                                                                                                                                                                                                                                                                                                                                                                                                                                                                                                                                                           |             |                          |
| <p>&gt;lcl Tb927_10_v4:1823486-1824759 No definition line found<br/> AAAATACTTTTCTTAGAAAAGGATCGCTTGTAAATGTTTCTGCCTGCTTTAACGCAAGAGCTCTAGACGTTCTTTTCTCCA<br/> TCGTTGTTTTTTAGAACGACAGCTCTCCTCCGATGATTCAGAAGTCGGGAGTGAAGCTAAGTTATTTAAGTGTAGGTA<br/> GACAGGACTATGGTAATAAACTCAGATGACGGCAATATGTAGCCGCTGCGGTTAATGTTAGTACCATTGTACAAAT<br/> TCGTCCGCCCTCACATCCTTTTGTTCGATGGGTTTCGGAATTGCCCTTAACCGTACGCATCTGTATATGTGAATAC<br/> GCGTGGTTGGGCATGTGTATAGGTGCCGTTCTTTACGGTTGCGGTGGTAAATGGCAGACAAGGGTTGATTTCCGG<br/> TACCGCTGTGTACCTTACAATACTGGCGGTTGCTTAGTACATCAACCCGAGATTATTTTACGCTGAGCCCGCTTCTCT<br/> CGTGATTGGGATAACCCTAATTTATCCCTCCTCTTACCCTTTCCATTTTACACGAATATATGTGTTTATATGGAT<br/> ACAGATCCTCCTATTTAGTAATATTTCTGATGAGTTTCTGCCCTAACCCCTAACCCCTAACCCAAACGCTGCTGTA<br/> CGCGGTGTGCTTCGTACGCATGTTGAATTCATGTTGGGATAGGAGTGGCACCACAAAGCGGCGTGAGATGACATGCGTT<br/> TAACTACCGATGTGACTACGGCACCCTGAAATCTCTGATCTCACTGGAGCTCCCGGGCCGGCCGCAACTCCCTTT<br/> TTTCTTTCCCTCCTTTTGTCTCTCTCTCTCTCCCATTTCCCTTTCCACACAGCTATACGTGGGCGTATTACT<br/> GTGGCCTACTCAAAAGCAGT<b>TTTCTGGGCGTTAGATGCTTTACAATGGGCGTTCCATTTAATTTGATAGCTCCTAACG</b><br/> <b>CAAGTAAACACTGCGAGATT</b>CAACGCGAATGGTGGATGAAAGCAGCACATTTGTGCAAACGTGATTTCCCTCCGTTGTA<br/> TGCGTTCAACACTTTAAAGAGGTGTTTGGTGACTTCCTCATCTTGTGCGCATGCCAATGTAACATCCCGTTATT<br/> TTTATTTTTTTTATTTTGAAGCAGCAGTCGATACCGTTGCACGTGCGCAGATCAGTTGAAGTTCATCTCTTAACTT<br/> TCCTCTGAATTTGTCGGTGGCTTCTGCTCTCGTTCTTTTATTTGTGTATGCTGTGTATACCCGAAGTG</p> | Tb10.NT.77  | TB10Cs1'H1               |
| <p>&gt;lcl Tb927_11_01_v4:2564137-2564659 No definition line found<br/> GAGTGGCGTGTCTCAATCAAGTACTAGGAAAGTCACAGTAGCAATGGCCGCAACACAAAGGTACCGGTGCTGTTGGTA<br/> GCGGCTCTATCAGACAGGCAATTAAGAATATTTATCGTTTGTGCGTATGTAAGAATTGCGAAGATTGGGTTGTCTGGT<br/> GGTGGCTGTGACAGGGTTCCATTTTCCATTCGGTTCCTCTTTTCTTTTACCTTTGCT<b>TGAGTGGTTAAAAA</b><br/> <b>AAGGAACATGACTGGGGTCTGCTCTCTCCTTTTCATGATGGAAGGCCACGAGAATTC</b>GTAATTTTAAATTTAGTGCTT<br/> ACCACCGTTGGCTCCGCTCTGTGCCATGCAAAAATACTCAGAGCTGTGTTGGTGGTGTCTCCATGTGTGTTTATACC<br/> CTGGCATCATTGCGTTAAAGGTGTTTGGTTGCCGTTTCCCGTTCACACTTCCCGCTGTTATTAGTAGTGCTATTCCGCT<br/> ATCGTTTTCTGTCTGTCGCACCTTTTATCGTTCGTTAACAC</p>                                                                                                                                                                                                                                                                                                                                                                                                                                                                                                                                                                                                                                                                                                                                                                                              | Tb11.NT.111 | TB11Cs1'H1               |
| <p>&gt;lcl Tb927_11_01_v4:3945635-3946258 No definition line found<br/> TTGGAAGGAAAGCATAATGTTTGAATAGCCGTCGCTAGGAGCCCTCCCGGATGCATGTTGATTACCCCTGCAATGGGC<br/> TACCAGTGTGTACAAAAGAGAAGCGGTGCCGT<b>GTGATGATATTAGTGATCTTTTGAAGTTAGCCCTTCAATCCGAGAGT</b><br/> <b>TB11Cs4pC1</b><br/> <b>TTCGTGATGGAATAACCGTTTATATTTGATTCTGAGATT</b>CTTTCCGATCTTTCTTTAAGTATTTGAAACTGGTTTGTCTC<br/> ACATACTTACCCCTCTCGACCAGCTCTGCTATTCGCTTTATCTACTGTTTCCCTACATTCTGTCGGTGGCCCAACT<br/> CCCTCTTGGCCCTGTTCAACGTGCC<b>TGTGTAACAGGGTGTGCTTGGCCGTTAGCTGCACCGTGTGATAGAGGTAGCGG</b><br/> <b>TB11Cs4pH1</b><br/> <b>AGATGATACTCCATGTACTTTGTCAAGTAAGAT</b>ATGATGTTATCATGTTATCTTGAAGTTAGCCCTTCAATCCGACAA<br/> ATTTGTGATGGAATAACTATACTATGTTATTAGCTGAAGTCTTGAATCTTTCTTGTCTTCTCCCTTCAATTAATCAACCT<br/> TGTTGCTGACTACTTTACTTTTGTTCGTACGGTTGCAGCACCATTGTTGCGTACGTATCTTTG</p>                                                                                                                                                                                                                                                                                                                                                                                                                                                                                                                                                                                                              | Tb11.NT.187 | TB11Cs4'C1<br>TB11Cs4'H1 |
| <p>&gt;lcl Tb927_11_01_v4:4381385-4382100 No definition line found<br/> TACGGATAGCAGAAAATGTAACAAGTACGTGAAGGAAGGAAAAGATAGTGAACCACGATCAATGCACTAAAAGAA<br/> AAAAAATCCTCTCCCTTTTGTGTAAATCGGTGGTGGATGAAGGAAGTTAGGAGGTAATGACTTATGCACCCATTTT<br/> CTCTACCGCTGTATGTGCGTGTAGCCTCTATAACAATAGTGGTGGAGCCCTTTAGATGCTAATAACAATCTCATCA<br/> TTAAGGGTGCAAAAAGTGTGTTTATCGTATGTCGT<b>TTTGCTACGTGTGACTTCACAGGCAGTTAGTTGCCGCTGTGC</b><br/> <b>CTGAGTCATGTGAGAGAGATATT</b>CTGGTGGCTTAACCCGTCAGTTGCTCATCTTTTATCTGTTGGTGTGACAAAT<br/> AGAATACATGTGGGATAAGATAACTCTTTGGGTGGATGTTGATCTATTAAGTCTTCTTACCTCTTCTGCAAGTTGT<br/> GGTTACCGCAAAAGGTATAGTCGTGGTGTGATGAAGTCAATTTACAGCGGAGTTCATTTCCCTAAGTAAATATCCCTAT<br/> TTTAAAGGGGAGCGGAACGACTTCCCTTACGGTCTCAGTAATGCAATGAACTAGTTTCCCTACCGAATAGTCGGAAGTCCCT<br/> GTTTAGCATCTTTGCTGTGTGAAATGTTGACCCCTTCTCTCTTTTGCCTCTGTGACAGGGTAAATAAGT</p>                                                                                                                                                                                                                                                                                                                                                                                                                                                                                                                                                                                           | Tb11.NT.214 | TB11Cs6H1                |

**S-11. Summary of newly identified snoRNAs found in the Kolev *et al.* 2010 dataset.**

Comparison between the newly identified snoRNAs in this study and the novel transcripts identified in Kolev *et al.* 2010, revealed several snoRNAs that are present in these polyadenylated transcripts. Each snoRNA is listed with its TB-sno identifier along with its corresponding identifier and sequence from the Kolev *et al.* 2010 dataset. The sequence of each snoRNA is highlighted within the novel transcript.

S-12

| Sequence                                                                                                                                                                                                                                                                                                                                                                                                                                                                                                                                                                                                                                                                                                                                                                                                                                                                                                                                                                                                                                                                                                                                                                                                                                                                                                                                                                                                                                                                                                                                                                                                                                                                                                                                                                                                                                                                                                                                                                                                                                                                                                                                                                                                                                                                                                                                                                                                                                                                                                                                                                                                                                                                                                                                                                                                                                                                                                                                                                                                                                                                                                                                                                                                                                                                                                                                                                                                                                                                                                                                                                                                                                                                                                                                                                                                                                                                                                                                                                                                                                                                                                                                                                                                                                                                                                                                                                                                                                                                                                                                                                                                                                                                                                                                                                | Kolev <i>et al.</i><br>2010, ID | sRNA             |
|-------------------------------------------------------------------------------------------------------------------------------------------------------------------------------------------------------------------------------------------------------------------------------------------------------------------------------------------------------------------------------------------------------------------------------------------------------------------------------------------------------------------------------------------------------------------------------------------------------------------------------------------------------------------------------------------------------------------------------------------------------------------------------------------------------------------------------------------------------------------------------------------------------------------------------------------------------------------------------------------------------------------------------------------------------------------------------------------------------------------------------------------------------------------------------------------------------------------------------------------------------------------------------------------------------------------------------------------------------------------------------------------------------------------------------------------------------------------------------------------------------------------------------------------------------------------------------------------------------------------------------------------------------------------------------------------------------------------------------------------------------------------------------------------------------------------------------------------------------------------------------------------------------------------------------------------------------------------------------------------------------------------------------------------------------------------------------------------------------------------------------------------------------------------------------------------------------------------------------------------------------------------------------------------------------------------------------------------------------------------------------------------------------------------------------------------------------------------------------------------------------------------------------------------------------------------------------------------------------------------------------------------------------------------------------------------------------------------------------------------------------------------------------------------------------------------------------------------------------------------------------------------------------------------------------------------------------------------------------------------------------------------------------------------------------------------------------------------------------------------------------------------------------------------------------------------------------------------------------------------------------------------------------------------------------------------------------------------------------------------------------------------------------------------------------------------------------------------------------------------------------------------------------------------------------------------------------------------------------------------------------------------------------------------------------------------------------------------------------------------------------------------------------------------------------------------------------------------------------------------------------------------------------------------------------------------------------------------------------------------------------------------------------------------------------------------------------------------------------------------------------------------------------------------------------------------------------------------------------------------------------------------------------------------------------------------------------------------------------------------------------------------------------------------------------------------------------------------------------------------------------------------------------------------------------------------------------------------------------------------------------------------------------------------------------------------------------------------------------------------------------------------------|---------------------------------|------------------|
| <p>&gt;lcl Tb927_01_v4:80586-84883 No definition line found</p> <p>CTCTATGCAAGAAGGAGGTGTAAGTTAAAAAACTTAGTTTTGAAGTGCCAAACATGTCCACTTCAGTACACCCATCA<br/> CTAACGGAACTACAAATCTTCACAGAGTGGTGTAGTTTGTGTGGGAGTTTCCGAACTGACGGGAAGAGATGTGAATGTAC<br/> GAAGTAAAAACGGGAAGATATCACCTGATGTGTTCTTTTGAATTTTATAAAGCAACGAGACACGATGTTACACATATG<br/> GTCAAGTGAAGTATTGCACTACAACCTGTCAAATAAACAAATTTGCAGCAACTAAAGGGGAATAAATGCAACAACAGGTC<br/> CCGGAAGCATGGAGTTGAGTGGTCTTTACTTATAGCATAACCAAAGCTTCACAAAGGAAACACCTTGAGAAACATTTCTAC<br/> AATGGGAAAGTAAAAACGATGCAGGAGGAAGTACCTGAAAGGGGTGGAGAATAAAACGGTGCATCACTCTTTTTAAAAA<br/> ATACAGTAGCCCTCAAAGCTGGGGACTCAAAGAATAATGGAGTGGCACCAGAGCACCTTTTACAACCAATAGTAAA<br/> CTCATTTGGTGAAGGAGTTATAATAATAATTTATTTTATTTGAGTTCACACACAAAGCCATCCGTACATCATGGC<br/> AATGGTTTCAGGAGCCAATAGAAATAGGAAAGTGAATGTGGCTGAGGACTAAAACATGTGAGGAACAGGGAAATTCATCATG<br/> CGGTGTTTTATGCATTGGCGGAAAATCATTACCGCATTCCAGCATAGGATGTAAGTGCATCTTATTTGTGTTGTAAG<br/> TTTACGACTCTCAGAGCAACGCCATTTTCAGTACAGGAGAACTTCCATCATCTCTATTGGACACACCCGACGCGGATG<br/> TTGTTTTTGGGTCCGTCTTTACAATACGGTAACAGGTGAACCCATCAAACAACACACACATGTTGTAATGGTGATTC<br/> GATAATATCTTTCAGGAAGTCCGTCCAGAGTGGTATCCAGTTGCAATATGAGTAGTGACCTGAATTACACCCAGCCATG<br/> CGATGGCAAAAAGAAATACACAGCTCCGAAAAAAAAGAGAAAAATGTTATACCACACTCACACGGCAGGCAAGCCCTCAA<br/> TAGTGGATTTTGGGGGAACCTTCAAAGAAATTCAAAAGCATACCACAGAGTCAACGATGCTAAATATCAACTGG<br/> GAAAAGGATATTGCCAGTGTGAGAAAAGTCTAGGGAGGAACCTCTGGAGGAAAAGAGGAAAAATCATAGCCATTACCACA<br/> AAAGGAAAAATGTGATACCATACTGAAAAGACCATACTGTAATGATAGAACATCCCATAAAGAGAAGAGCACTGCTGACAC<br/> GCGCAGCGGCAGTAGTTGCAATGGAGCAGCAGATTGACAACATATTTATTAATACAAATGGGAAAGCACATCTACACAATG<br/> GAACTCCAACGAAGCACAGTGGGTATCTCAGATATGTGACAGTGCCTGACGAACTGATTTTAAATGTTTTGAT<br/> GTAAGATACAATTTGGAAGGAATGTGGCGCCCAAGTGTGAGGGAAGCCGGGACTTATAACCGTGAATAACTTTCCCAAAT<br/> ATCGATTGCACAGCATTCTTGACACTCACAAGGAAAAACAAGGTGACCTCACGGGATGAGGAAAAAAAAGACTTCAC<br/> CTCTCCAATAGGAAATGAATGTGGGAATGATTTCCCTTCCGTGGATTTGACAGAGGATGATGCAAGCAGCGAGTAAGCGA<br/> TTTGTATGGGGTTGGAGCATTAAAGATAGCACAGATGATGCAAGAAACAAGAGAGAAAAGTATCAAAGAAGGAGTCA<br/> GAATTCGCGCATTTGTAGAAAATGATGCCAAAATAATGAAGCAGCCGCGTATCATTGGCACAGTTTCAGAGAGACATATGAC<br/> AGGATGAGTTATGTGCTATTTCTTTGTGATTTGGGGAAACACAGATTTTGAAGAAGGGCTTGATTTATGCAATGACCAAG<br/> GCTAAAAAGAGCAGGGATGATTTATAGGCATATCTCCCATTTGGGTCACTTTTCCCACTATTTAAATACTCTCCATGACCA<br/> GTCTGTAGCATTGTTTATCTAAAGTCACTCTCCAAAGTGAAGTTGCCTGAGGATGTTCCGCTGGAGTTCGGATGCC<br/> TTAACTAAAATGAGGAACCTTTGCAATTCGAATTCGAACTCCCATCAGTTAATAAAGAGAACCTGGAGTTTACACACAT<br/> CACAAGGCTCTTTTCAGGACATGCATCTCTCGTGAGGCTGCAGCAGGCGACCCCTGAAATATGAGGACTCAAACATGGA<br/> TATGCAACATATTTATAGTGTGAGGCACATGACGTGGTTAAATGTCGTGAAAACAAAATAGTTACGAGCATGGAGGAAT<br/> GTAGGCATACATCATTTGGTGATTTGCAAAAGATGACACAACAATGTGATTTTATTGGAGTTTTAGTTTAAACCATGAAA<br/> AGCAGAGATGAGGATGGCTGGGACAAAGTACACAACAATTCGAGTATCCCTGCTATGTGAAAAAATCTACTATAGA<br/> ATAAATGAAACTGTTGTATCATGCATGATGTACGTGGCAGCAGGAGTGAGAAAAACAATAGCTTTCTCCTTACTACTA<br/> CTACTGCTACTTATTTTTTAAATGAAAGCCTGCATTTATGAATGGTTGTTTTGGACTTAGGAGTGCAGAGTATTTTGT<br/> ACGGTTATATTTCTTAAACACACCTGTACTCCCGTTTATTTACACAGCTGTCTGCAAGAGAGTGAATTTTTAGAAA<br/> CCCACACAACACACCTCTTTCCGCCCACAGGATGAGTTAAAGACGCTTTCAGACACTTCCGCTTCGTAGTAAAT<br/> TATCGTTTTCAATTCATATTTTGGTGGATGATGAGGAAACCTTACTGTTTTTTCAGCATGATAATTTTTCGTATATCT<br/> TTCTTGTGGGTAGTAAAAAGGGAAGGTAAGAATTAACCATTCATTTATTTGTTATTTATGCTGTTGAGAACTATGACTA<br/> TGAGAGATGGCTTAGGGAAGATGTGTGAAATGCGTCACTATATACCTTTATGAAAGTGTGACGGTACAGAGCGATTCAA<br/> ATAAATGAAAGTAAAGAAATAACGATTAAGTATTAAGTTTTCTCAGTTATTTTATGTTTGTGAAGTACGCTTATTT<br/> GAATGAAATCCTCCGCTTGAAGGAAGATATTAACATTTATGATACCTTCACTTCACTTAACTTACCTTATTTGTATCGTC<br/> TTACTTTAAATGGATGAAAAGATGTTTCATGCTGATGTTTAAACGCTTTTGCATGTCACATCTGATTATATATGATAAA<br/> TATATTTATATATATTCATGAACCGGAAGAAATAAATAGTAGCGCGTCACTTTTGTCTCTCAAATATAAACATCGCT<br/> AGACATTCATAGTGCAGAGTTTATAATCTGAAGTGAACACCAACATTTGAATATTTACTCATGCACTAATTTATTACAC<br/> ACTTCATAGCATCAGAAATCGAATAATACTCGAAGTATTTATTTATTTGCTTGTGAGGCACATAACCGGTAAGCAGTAA<br/> ATATTATGCCTTGCAGTATTTTATGAACTGGAGTTAATGAGTGTAGTGCTAACAAATCCTTTAGTTATATCACACG<br/> CAATCTTTTACCATTTAATCTCTTTTTTTATTTTTCTTTGTTCTCTACTTGTCACTCAAACCTTTGTACAATAG<br/> TTTATCCATGAGGAAGTTTATTAAGCTTTCAAACATGCTTTGATGTTGTTATTTCTGTTGTTTTGATAGAGGCATC<br/> CGCGCTAATTTACTTTCAGGCGTCAGATATTTGGAATGAGAGTTAATGTTGTCAGCTGTGCTGTTATGTATATAT<br/> ATATGCACAGAAACAAAATTAATCTGAGGAAAGCTGCGTAATATTTCTTGATTTTTTATTCTTACTTTTTAGAGAATA<br/> ATATAATGCATATATTTGTTTGTGTTGTGCTGATTTGTTACAATTACATTTATCATTTCTACACACACACATACT<br/> GAGTAAATATGGAATGATTTGTTAAGAAATGAGCAGATGTTGTTGTTATGTTGTTGTTGTTGTTGTTGTTGTTGTTGTT<br/> GCGAATTATAATATGTTGTTAAATTTGTATCATATATTTGTGTTTTTATAAGTTTTCAAATTTATTTATGTTTCTATT<br/> TTTGATTAATTTGTGCTTACATCACCAGTACCGTCTTTACTGTTTCCCTGTTTGAAC</p> | <p>Tb1.NT.4</p>                 | <p>TBsRNA-1</p>  |
| <p>&gt;lcl Tb927_07_v4:749919-750430 No definition line found</p> <p>TTAGCTGAATTTCTGGTTTTTGGAGTTATCATGATGTACGTGCTGTAGCCGTGGCCATGTTGGCAATATTCTTCG<br/> CAGCTTTAGTGTCTTTTTACGCGGTAAGTTATCTGCTGGATTCAGTTGCCACGAGCAACCGTGGAAATTTGGCAGTATTCT<br/> GGGCTGATGCCCGGTGAGTCACTACGAGAATTCGTCGTGCTCGGAAGGAGGAATAACGATTATCATCCAACAGTGA<br/> ATATGAGCGGTTGGTGGCGCTCAGGTGACACGGTTTGTTCGCAAGATTCTGCGCCGCGCTTATTTGTTTCCGATTGAG<br/> CGCATATGCCGAGTTAGGTAATGTTCCGTTGGTGTGCTGTGGATCTACTGATGTGATCTGTTGTTGTTGTTGTTGTT<br/> TTGAAGAACATTTTTTAAATACCTTATATTTGTTTTAAATCTCTCTTCCCTTTTTGTTACCTAATGTGGCCGTAAG<br/> CATCCTTAATTAATATTTTGGTTGCCATTGTT</p>                                                                                                                                                                                                                                                                                                                                                                                                                                                                                                                                                                                                                                                                                                                                                                                                                                                                                                                                                                                                                                                                                                                                                                                                                                                                                                                                                                                                                                                                                                                                                                                                                                                                                                                                                                                                                                                                                                                                                                                                                                                                                                                                                                                                                                                                                                                                                                                                                                                                                                                                                                                                                                                                                                                                                                                                                                                                                                                                                                                                                                                                                                                                                                                                                                                                                                                                                                                                                                                                                                                                                                                                                                                                                                                                                                                                                                                                                                                                                                                                                                                                                                                                            | <p>Tb7.NT.25<br/>Tb7.NT.26</p>  | <p>TBsRNA-14</p> |

|                                                                                                                                                                                                                                                                                                                                                                                                                                                                                                                                                                                                                                                                                                                                                                                                                                                                                                                                                                                                                                                                                                                                                                                                                                                                                                                                                                                                                                         |                          |                          |
|-----------------------------------------------------------------------------------------------------------------------------------------------------------------------------------------------------------------------------------------------------------------------------------------------------------------------------------------------------------------------------------------------------------------------------------------------------------------------------------------------------------------------------------------------------------------------------------------------------------------------------------------------------------------------------------------------------------------------------------------------------------------------------------------------------------------------------------------------------------------------------------------------------------------------------------------------------------------------------------------------------------------------------------------------------------------------------------------------------------------------------------------------------------------------------------------------------------------------------------------------------------------------------------------------------------------------------------------------------------------------------------------------------------------------------------------|--------------------------|--------------------------|
| <p>&gt;lcl Tb927_07_v4:762590-763210 No definition line found<br/> AGCTGAATTTTCATGGTTTTGGAGTTATCACATGATGTACGTGCTTGTAGCCGTGGCCATGTTGGCAATATTTCTTCGCA<br/> GCTTTAGTGCTGTTTTTACGCGGTAAGTTATCTGCTGGATCAGTTGCCACGAGCAACGGTGGAAATGGCAGTGATTTCTGG<br/> GCTGATGCCCGGTGAGTCACTACTACGAGA<b>GTTCGTCGTGCTCGGAAGGAGGAATAACGATTATCATCCAACAGTGAAT<br/> ATGAGCGGTTGGTGGCGCCTCAGGTGACACGGTTTTGTTCGCAAGATTCGTGCCGCCCGCTTATTTGTTTCCGATTGAGCG<br/> CATATGCCCGAGT</b>AGGTAATGTTCCGTTGGTGTGCTGTGGATCTACTGATGTGATCTGTTGTTGTTGTTGTTTT<br/> GAAGAACATTTTTTAAATACCTTATATTTGTTTTAATCTCTCTCTAGTTTTCGTTACACTAATGTGGCCGTAAGCA<br/> TCCTTAATTAATTTTTGGTTGCCATTGTTAGGTGCTCCGCACTTATGTTTACTGTTGGTAATGAAACTATTTCTCTTA<br/> TTATTATTATTCTTTTTCTATCCCTTGGCCTTACCATTATCTTTTTTTCTTACTTT</p>                                                                                                                                                                                                                                                                                                                                                                                                                                                                                                                                                                                                                                                                                   |                          |                          |
| <p>&gt;lcl Tb927_08_v4:1762415-1762818 No definition line found<br/> ACATTAG<b>AACACACAATGGGGACCATCAGCCGCCCTGGAGGGATGCGGCCTAAGTGGCACAGAAGCGCATAAAGCGCTT<br/> AAAGCGCCGACGACGACGATGCGCCAGCGCTCCAAGTAAGCGCCCTGATGCATCCGTGAACATTCTCGTGGTGGCGTT<br/> CAGTGCTCCTTTTTTGGCAGTTTCGCACGCCGAACCTCCGATCAACGAAACGCATGCACATGTGCGTGCAACCTATTTAT<br/> GGGTACGGAAACAAAGCATTGATGCTTCCGCCCTTTTTTCGTGCTCAGTTACCTTTCCATTTTCTACTTCTAGAGT<br/> GGAAACAAGTGTCAATGTTTTCTTCCCTTTGGAGGTATGCCTGTGCTATAATGTTCCCTTCTTATATTATGTCTTGGC<br/> CCTC</b></p>                                                                                                                                                                                                                                                                                                                                                                                                                                                                                                                                                                                                                                                                                                                                                                                                                                                                                                               | Tb8.NT.93                | TbS RNA-15               |
| <p>&gt;lcl Tb927_08_v4:1762963-1763379 No definition line found<br/> CATTAG<b>AACACACAATGGGGACCATCAGCCGCCCTGGAGGGATGCGGCCAAGTGGCACAGAAGCGCATAAAGCGCTTA<br/> TbS RNA-16<br/> AAGCGACGACGACGACGATGCGCCAGCGCTCCAAGTAAGTGGACAGTCAACCGCTGAACGATCCCGC</b>GGTFCGCGCGAA<br/> <b>T</b>CAGTGTGCTCAGTGTCTTGTGCGGCATGGATT<b>CGTGGCAGGGGAAACACCCAAGTGTGTA</b>TTACCCCTTATGATTTG<br/> <b>TbS RNA-17</b><br/> TTCCTTTTTTTTTCTTCTGTTTTGATACGCCGAGGAGCGGCCCTTTTTCCCGTGTGGTTGTTCTTTTTGTTAGCGCT<br/> CTCCTTCAATACTGCGTGGTGTCTGTTACCGTACGGCAGTAACCATCTCGGGGGCGGGGGGGGGTCCCTTTTTCC<br/> AAGCTCACCTCACCG</p>                                                                                                                                                                                                                                                                                                                                                                                                                                                                                                                                                                                                                                                                                                                                                                                                                                                   | Tb8.NT.94                | TbS RNA-16<br>TbS RNA-17 |
| <p>&gt;lcl Tb927_08_v4:1763474-1764050 No definition line found<br/> TCTAGTCAGAAAGGTGA<b>AGGATGGGGACCATCAGCCGCCCTGGAGGGATGCGGCCAAGTGGCACAGAAGCGCATAAAGC<br/> GCTTAAAGCGCCGACGACGACGATGCGCCAGCGCTCCAAGTAAGCGCCCTGATGCATCGAAAAGAGGTGCAATAAAGCG<br/> CGCTGCGCGCCCGCTCGCGCCCG</b>CGTTTTGTCGATACCTGGTTCGTAAGTGGCACAGAAGCGCATAAAGC<br/> TGTCTGGGAAGCGCTTAGGAGGGCATCCGATTGTACCGTTTCAAGTTTTGGTGTGCTTCTCTCTACTACTAT<br/> GTTTTGCTCCTTCAAGTTTTTCCCTCTCATCTTTGCTCCCTTTTTGCGAGGCTCCTGCAATTGGAATGGCTACGAGGT<br/> TTTGGAAAGAGGTCACTGCCAGAGGATGGGGGAAGAAGTCTAAAAGTAATCAGGGGAAAAGACAGCAGCAAAAAAACA<br/> TAACGGAATGTCTGGGTGAGTTGAGGCCCTCTCGGGTGCAGCCACAGTCACTCTCTGGCTGTCTGTTTTTTTTTTGT<br/> TTCGATTCTCTCGCTAC</p>                                                                                                                                                                                                                                                                                                                                                                                                                                                                                                                                                                                                                                                                                                                                        | Tb8.NT.95                | TbS RNA-18               |
| <p>&gt;lcl Tb927_10_v4:1823486-1824759 No definition line found<br/> AAAATACTTTTCTTAGAAAAGGATCGCTTGTAAATGTTTCTGCCTGCTTAAACGCAAGAGCTCTAGACGTTCTTTTCTCCA<br/> TCGTTGTTTTTTAGAACGACACGCTCTCCTCCGATGATTCAGAAGTCGGGAGTGAAGCTAAGTTATTTAAGTGTACAGTAA<br/> GACAGGGACTATGGTAATAAACTCAGATGACGGCAATATTTAGCCGCTGCGGTTAATGTTTAGTACCATGTACAAAAT<br/> TCGTCCGCCCTCAGTTCTTTGTTTCGATGGGGTTCGGAATGGCCCTTAAACCGTACGCATCTGTATATGTGAATAC<br/> CGGTGGTTGGGCATGTGTATAGGTGCCGTTCTTTACGGTTGCGGTGGTGAATGGCAGACAAGGGTGTATTTCCGG<br/> TACCGCTGTTACCTTACAATACTGGCGGTTGCTTAGTACATCAACCCGAGATTATTTTCAGCTGAGCCCGCCTTCTCT<br/> CGTGATTGCGATAAACCACTAATTTATCCCTCTCTTACCCTTTCCATTTTTACAGCAATATATGTGTTCATATGGAT<br/> ACAGATCCTCCTATTAGTAATATTTCTGATGAGTTTCTGCCCTAACCTAACCTAACCCAAACGTAACGCTGCTA<br/> CGCGGTGTGCTTCTGACGATGTTGAATTCATGTTGGGATAGGAGTGGCACCACAAAGCGCGTGAAGTACATGCGT<br/> TAACTACCGATGTGACTACGCCACCCACTGAATCTCTGATCTCACTGGAGCTCCCGGGCCGCGGCAACTCCTTT<br/> TTTCTTTTCCCTCTTTTTGTTCTCTCTCTCTCTCCCTTCCCTTCCACACAGCTATACGTGGGCGTATTACT<br/> GTGGGCACTACTCA<b>AAGCAGTGTCTTGGCGTTAGATGCTCTTACAATAAGGGCGTTCATTTAATTTGAGTCTCCTAACG<br/> CAAGTAAACACTGCGAGATT</b>CAACCGCAATGGTGGATGAAAGCAGCACATTTGTGCAACCGTGAATTTCCCTCCGTTGTA<br/> TGCGTTCAACAACCTTAAAGAGGTGTTTGGTGAATCTCTCTGTCGCGATGCCTAATGTAACATCCCGTTATT<br/> TTTATTTTTTTTATTTTGAAGCAGCAGTGCATATCCGTTGCACGTCGCACGATCAGTTGAAGTTCATCTCTTAACTT<br/> TCCCTCTGAATTTGTCCGTCGCTTCTGCTCTGTTCTTTATTTGTTGATGTGTGATACCCGAAGTG</p> | Tb10.NT.77               | TbS RNA-21               |
| <p>&gt;lcl Tb927_10_v4:3228053-3228620 No definition line found<br/> TCGCTCAAGTCTTCTGGATTTCCTCCCGGGGAGAAACTAGCGGTGCCATTCACGCTTGCACGGCCCA<b>AGCCTGCA<br/> GCGGTAAGCACTTTTCTTTAGCTCACATTCGGGGATAGAGGGTCTTAGTCTAATTTGGGCAAGAACA</b>GAGAGGGTACA<br/> ATGGGTTTCTTCGACTCTGACCTCAGCTACCCACGGTGGCAGCAGAGCGCATGAAGCACAAGCCGCTCGTCTTGTGCA<br/> GGGCCCAATTCATATTTTCATGGACGTCAAGTGCCTCCGATGCAAGAACAATCACTGTGGTATACGCCATGCCACGCTCAG<br/> AGGTTAAGTGAATGGTTGCGTACCATGCTCTGCCGCCCACTGGTGGTAAGGCAATCCTGGTAACTGGCTGCGGATTC<br/> CGCAAAAACAGATCATTAAAGCAAGGTACAGATGGGCTTTCACCGGATTTGGCGTCGTGAAGCAGATGTAAGCTATT<br/> TTCCCTGGGATTCGAATGGAATGAAAAGCAAAATTTCTGTTTTCTTTTTTTTTTGGCGTCTATAGCAACTCATCTAC<br/> GCCTCTC</p>                                                                                                                                                                                                                                                                                                                                                                                                                                                                                                                                                                                                                                                                                                                                        | Tb10.NT.77               | TbS RNA-22               |
| <p>&gt;lcl Tb927_06_v4:226530-226986 No definition line found<br/> GGTCTCTGCCTTTAATTTGTTGGATGAGCTATTTCAATTAATTTTTTGCTTCTCTTTTTGGGTTGCAATAATAGT<br/> TCCTTCAACCTTACGGCCAGAAATGGGAACAAGTGTAGACCGCCAATTTGGCGAAGGGGCTGCAATGTTGCTTT<br/> ATTTCAATGGTGGTTTTATGTGCAAGT<b>TCCCTGCTTCAGATGGGCCCGCAGCTGAAGTGTGTTTCCGCTGCCCTGCCCC<br/> C</b>CACTGCTGCGTTGCTGCTGGAGAAACGATGTTGGAGGTTGACGGGTGTGTGCTTTTGAAGACTTTGTATGAATATGGAA<br/> <b>GGAGCTCGCAGCGGTTACTACAG</b>GCAGTTAAGGGCTGAGTGTGCTTCTTATTGCTCTCCCTCTTGGAGTAT<br/> TCTTGTGGGAGAGTATTTATATATCCGAGTTTCGGTTAATTTGCCCTTAGGGATG</p>                                                                                                                                                                                                                                                                                                                                                                                                                                                                                                                                                                                                                                                                                                                                                                                                                                                                   | Tb6.NT.31<br>Tb10.NT.118 | TbS RNA-23<br>TbS RNA-23 |

|                                                                                                                                                                                                                                                                                                                                                                                                                                                                                                                                                                                                                                                                                                                                                                                                                                                                                                                                                                                                                                                                                                                                                                                                                                                                                                                                                                                                                                                                                                                                                                                                                                  |                                                                                                           |                                                                                                       |
|----------------------------------------------------------------------------------------------------------------------------------------------------------------------------------------------------------------------------------------------------------------------------------------------------------------------------------------------------------------------------------------------------------------------------------------------------------------------------------------------------------------------------------------------------------------------------------------------------------------------------------------------------------------------------------------------------------------------------------------------------------------------------------------------------------------------------------------------------------------------------------------------------------------------------------------------------------------------------------------------------------------------------------------------------------------------------------------------------------------------------------------------------------------------------------------------------------------------------------------------------------------------------------------------------------------------------------------------------------------------------------------------------------------------------------------------------------------------------------------------------------------------------------------------------------------------------------------------------------------------------------|-----------------------------------------------------------------------------------------------------------|-------------------------------------------------------------------------------------------------------|
| <pre>&gt;lcl Tb927_10_v4:2480293-2480653 No definition line found TTCCTTCTAAACCTTCAGGCCAGAAATGGGAAACAAGTGTTAGACCGGCCAACTTGGGCGAAGGGGTCTGCATTTTGCTT TATTTTCATTGGTGGTTTTATGTGCAGTGT<span style="background-color: yellow;">TTCCCTGCTTCAGATGGGCCCGCAGCTGAAGTTGTTTCGCTGCCCTGCC</span> <span style="background-color: yellow;">CCCAC</span><span style="background-color: yellow;">TGCTGCGTTGCTGCTGGAGAAACGATGTTGGAGGTTGACGGGTGTGTGCTTTTGAAGACTTTGTATGAATATGGA</span> <span style="background-color: yellow;">AGGAAGCTCGCAGCGGTTACTACAG</span><span style="background-color: yellow;">GCAGTTAAGGGCTGAGTGTGTGCCTTTTCTATTGCCTCTCCCCCTTTGAGCTA</span> <span style="background-color: yellow;">TTCTTGTCCGGAGAGTGATTATTTATCCGAGTTTCGGTTA</span></pre>                                                                                                                                                                                                                                                                                                                                                                                                                                                                                                                                                                                                                                                                                                                                                                                                                                                                                      |                                                                                                           |                                                                                                       |
| <pre>&gt;lcl Tb927_11_01_v4:4133914-4134707 No definition line found TGGTTACGTATATATATATATATATATATATAGCACATTCCTCCACAAAGATCTATATATGTTGTGTTTTGGATTACT GTTTGGAAATGCCTCCATGTGCGCTGCCGTGTTTACTTTGTTTGTGTACCTCCCCGTAGTTAGGCACCTTCTTGCCATGAC ATCATAGCAACTTGTGCTGCATCCACCCACTGAGGTATAATTCAGATCCACATCCTTATTGCGTTCAGCGCCTTCATTA TTTGAGTAGTGGGAAGCTGCTGTATTAGTTGGGTGAGGGGATACGGATCTGTTTTCCGCTTTCCCTATTGTCATGTGAGT CACACAACCTCACTTTTCTCTTCTACATCGCCACACTCTTCTATCTTTTTGGACCCCTTTTTTCGTATCCGGATTA TTCGGTTT<span style="background-color: yellow;">CTAATCCAAGACTTACCCATGTTATGGTTTTTGTGGTTTTGCTGACCGAAGAGAGTG</span><span style="background-color: yellow;">AAGTGGTTATGCTGT</span> <span style="background-color: yellow;">GTGTGTCGCTTTTCATGTAGCTGTTGCTGTGCTTCTCTTGATACCCCTTTGTA</span><span style="background-color: yellow;">CTTCA</span><span style="background-color: yellow;">TATATATATACGTGTTGTGTAAT</span> <span style="background-color: yellow;">TATTACTACTGCCGTCGGTGATACCGGTTAATGAACGCTCTTCCAAAATACGTGAATGTGCTTCTTTTTCTAGTTTAA</span> <span style="background-color: yellow;">TCTTTTTGTGATATTGTTCA</span><span style="background-color: yellow;">GTTTTTCGTA</span><span style="background-color: yellow;">ACCCCTGCTGTTTATA</span><span style="background-color: yellow;">ACGTA</span><span style="background-color: yellow;">ACTTTTGTG</span><span style="background-color: yellow;">CGCTCTCT</span><span style="background-color: yellow;">CTATTGTC</span> <span style="background-color: yellow;">TGTCTCGTCAGTTCA</span><span style="background-color: yellow;">ATTCTTACTCGCAGTAACGTTTTTCCCTCCTTTTGGCTGCAGGCAACAAGATTTG</span></pre> | <p style="background-color: yellow;">Tb11.NT.195</p> <p style="background-color: yellow;">Tb11.NT.197</p> | <p style="background-color: yellow;">TBsRNA-25</p> <p style="background-color: yellow;">TBsRNA-25</p> |
| <pre>&gt;lcl Tb927_11_01_v4:4140700-4141266 No definition line found TGGTTACGTATATATATATATATATATATATAGCACATTCCTCCACAAAGATCTATATATGTTGTGTTTTGGAT TACTGTTTGGAAATGCCTCCATGTGCGCTGCCGTGTTTACTTTGTTTGTGTACCTCCCCGTAGTTAGGCACCTTCTTGCCA TGACATCATAGCAACTTGTGCTGCATCCACCCACTGAGGTATAATTCAGATCCACATCCTTATTGCGTTCAGCGCCTTCA TTAATTTGAGTAGTGGGAAGCTGCTGTATTAGTTGGGTGAGGGGATACGGATCTGTTTTCCGCTTTCCCTATTGTCATGT GAGTCACACAACCTCACTTTGCTTTTTCTCTACATCGCCACACTCTTCTATCTTTTTGGACCCCTTTTTTCGTATCCGGA TTAATTCGGTTT<span style="background-color: yellow;">CTAATCCAAGACTTACCCATGTTATGGTTTTTGTGGTTTTGCTGACCGAAGAGAGTG</span><span style="background-color: yellow;">AAGTGGTTATG</span> <span style="background-color: yellow;">CTGTGTGTGTCGCTTTTCATGTAGCTGTTGCTGTGCTTCTCTTGATACCCCTTTGTA</span><span style="background-color: yellow;">CTTCA</span><span style="background-color: yellow;">TATATATATACGTGTTGTG</span> <span style="background-color: yellow;">TAATTAT</span></pre>                                                                                                                                                                                                                                                                                                                                                                                                                                                                                                                                                                                                                                                                  | <p style="background-color: yellow;">Tb11.NT.185</p>                                                      | <p style="background-color: yellow;">TBsRNA-26</p>                                                    |

**S-12. Summary of novel sRNAs found in the Kolev *et al.* 2010 dataset.**

Comparison between the novel sRNAs identified in this study and the non-coding RNAs identified in Kolev *et al.* 2010, revealed several sRNAs that are present in these polyadenylated transcripts. Each sRNA is listed with its TB-sRNA identifier along with the its corresponding identifier and sequence from the Kolev *et al.* 2010 dataset. The sequence of each sRNA is highlighted within the novel transcript.
